# Supplementary material for: Separating the post-Glacial coancestry of European and Asian Y chromosomes within haplogroup R1a
Source: Springer Nature journal article supplement (doi:10.1038/ejhg.2009.194), 2009-11-04
Supplement: 41431_2010_BFejhg2009194_MOESM21_ESM.pdf [file 41431_2010_BFejhg2009194_MOESM21_ESM.pdf]

**Table S1. Frequencies of haplogroups R1a\*-M420, R1a1\*-SRY10831.2 and R1a1a\*-M17/M198**

| Population or country/territory         | N   | R1a* | R1a1* | R1a1a* | Reference      |
|-----------------------------------------|-----|------|-------|--------|----------------|
| <b>Europe</b>                           |     |      |       |        |                |
| Friesland                               | 94  | nd   | 0     | 7      | 1              |
| England                                 | 310 | nd   | 0     | 1      | 1              |
| Greece                                  | 132 | nd   | 0     | 8      | 1              |
| Crete                                   | 168 | 0    | 0     | 18     | 2              |
| Crete                                   | 193 | 0    | 0     | 17     | updated from 3 |
| Finland east                            | 306 | nd   | 0     | 18     | 4              |
| Finland west                            | 230 | nd   | 0     | 20     | 4              |
| Belgium                                 | 54  | nd   | 0     | 2      | 5              |
| Denmark                                 | 107 | nd   | 0     | 19     | 5              |
| Norway                                  | 51  | nd   | 1     | 9      | 5              |
| Galicia                                 | 100 | 0    | 0     | 1      | 5              |
| Austria                                 | 129 | nd   | 0     | 18     | 5              |
| Germany                                 | 95  | nd   | 0     | 6      | 5              |
| Swedes, Sweden                          | 305 | nd   | 3     | 36     | 6              |
| Sweden                                  | 160 | 0    | 0     | 39     | 7              |
| Saami, Sweden                           | 38  | 0    | 0     | 6      | 6              |
| Estonia                                 | 118 | 0    | 0     | 44     | 7              |
| Estonia                                 | 100 | 0    | 0     | 35     | This study     |
| Latvia                                  | 113 | 0    | 0     | 44     | 7              |
| Lithuania                               | 164 | 0    | 0     | 56     | 7              |
| Karelians, Russia                       | 132 | 0    | 0     | 33     | 7              |
| Romania                                 | 335 | 0    | 0     | 57     | This study     |
| Croatia Krk Island                      | 74  | 0    | 0     | 27     | This study     |
| Croatia Brac Island                     | 49  | 0    | 0     | 12     | This study     |
| Croatia Hvar Island                     | 91  | 0    | 0     | 6      | This study     |
| Croatia Korcula Island                  | 134 | 0    | 0     | 21     | This study     |
| Croatia mainland                        | 108 | 0    | 0     | 29     | This study     |
| Herzegovina                             | 141 | 0    | 0     | 17     | This study     |
| Albanians, Kosovo                       | 114 | 0    | 0     | 4      | This study     |
| Serbia                                  | 113 | 0    | 0     | 21     | This study     |
| FYROM, Macedonia                        | 79  | 0    | 0     | 11     | This study     |
| Greeks, Macedonia                       | 57  | 0    | 1     | 6      | 8              |
| Czech Republic                          | 53  | 0    | 0     | 20     | This study     |
| Belorussia                              | 50  | 0    | 0     | 21     | This study     |
| Russians, Russia                        | 39  | 0    | 0     | 15     | This study     |
| <b>Middle East, Central, South Asia</b> |     |      |       |        |                |
| Tajiks, Turkmens                        | 38  | 0    | 0     | 3      | This study     |
| Azer                                    | 29  | nd   | 0     | 3      | 1              |
| Tuvas, Russia                           | 104 | 0    | 0     | 8      | This study     |
| Altaians, Russia                        | 58  | 0    | 0     | 24     | This study     |
| Mongolia                                | 402 | nd   | 0     | 10     | 1              |
| Pakistan                                | 176 | nd   | 0     | 43     | 9              |
| India                                   | 728 | 0    | 0     | 115    | 9              |
| India Jammu (Brahmin)                   | 61  | 0    | 0     | 23     | This study     |
| India Andhra-Pradesh (Brahmin)          | 19  | 0    | 0     | 5      | This study     |
| India Madhya-Pradesh (Brahmin)          | 54  | 0    | 0     | 19     | This study     |
| India Uttar-Pradesh (Brahmin)           | 171 | 0    | 0     | 85     | This study     |
| India Uttranchal (Brahmin)              | 21  | 0    | 0     | 10     | This study     |
| India West-Bengal (Brahmin)             | 49  | 0    | 0     | 24     | This study     |
| India Asur Jharkhand                    | 88  | 0    | 0     | 5      | This study     |
| India Ho Jharkhand                      | 45  | 0    | 0     | 0      | This study     |
| India Mawasi Jharkhand                  | 27  | 0    | 0     | 1      | This study     |
| India Mawasi Madhya-Pradesh             | 12  | 0    | 0     | 1      | This study     |
| India Mahali Jharkhand                  | 32  | 0    | 0     | 3      | This study     |
| India Santhal Jharkhand                 | 20  | 0    | 0     | 2      | This study     |
| India Birhor Chattishgarh               | 27  | 0    | 0     | 1      | This study     |
| India Birhor Maharashtra                | 35  | 0    | 0     | 1      | This study     |
| India Baiga Madhya-Pradesh              | 23  | 0    | 0     | 2      | This study     |
| India Baiga Orissa                      | 42  | 0    | 0     | 1      | This study     |
| India Kharia Chattishgarh               | 37  | 0    | 0     | 2      | This study     |

|                                 |     |    |   |    |                 |
|---------------------------------|-----|----|---|----|-----------------|
| India Savara Orissa             | 21  | 0  | 0 | 2  | This study      |
| India Garo Meghalaya            | 25  | 0  | 0 | 1  | This study      |
| India Khasi Meghalaya           | 21  | 0  | 0 | 1  | This study      |
| Oman                            | 121 | 1  | 0 | 11 | updated from 10 |
| Iran                            | 87  | 0  | 0 | 9  | This study      |
| Iran                            | 150 | 2  | 1 | 19 | updated from 11 |
| Qatar                           | 72  | 0  | 0 | 5  | 12              |
| United Arab Emirates            | 164 | 1  | 0 | 12 | updated from 12 |
| Lebanon                         | 914 | 0  | 0 | 23 | 13              |
| Syria                           | 44  | nd | 0 | 1  | 1               |
| Turkey                          | 173 | nd | 0 | 18 | 1               |
| Turkey                          | 89  | 2  | 0 | 3  | This study      |
| Turkey                          | 523 | 1  | 0 | 36 | updated from 14 |
| <b>Caucasus</b>                 |     |    |   |    |                 |
| Georgia                         | 68  | nd | 0 | 3  | 1               |
| Armenians, Armenia and Diaspora | 734 | nd | 2 | 37 | 1               |
| Armenia                         | 25  | 0  | 0 | 1  | This study      |
| Megrels                         | 67  | 0  | 0 | 6  | This study      |
| Abkhazes                        | 162 | 0  | 0 | 15 | This study      |
| Osetins South                   | 23  | 0  | 0 | 1  | This study      |
| Osetins North                   | 134 | 0  | 0 | 1  | This study      |
| Avars                           | 42  | 0  | 0 | 1  | This study      |
| Chamalals                       | 27  | 0  | 0 | 2  | This study      |
| Bagvalals                       | 28  | 0  | 0 | 1  | This study      |
| Andis                           | 49  | 0  | 0 | 1  | This study      |
| Lezgis                          | 31  | 0  | 0 | 0  | This study      |
| Darginians                      | 68  | 0  | 0 | 0  | This study      |
| Tabasarans                      | 43  | 0  | 0 | 1  | This study      |
| Adyghes                         | 160 | 0  | 0 | 18 | This study      |
| Karachays                       | 69  | 0  | 0 | 19 | This study      |
| Kumyks                          | 76  | 0  | 0 | 10 | This study      |
| Balkars                         | 136 | 0  | 0 | 35 | This study      |
| Cherkessians                    | 126 | 0  | 0 | 16 | This study      |
| Kabardians                      | 141 | 0  | 1 | 19 | This study      |
| Abazas                          | 89  | 0  | 0 | 17 | This study      |
| Nogays                          | 87  | 0  | 0 | 11 | This study      |
| Karanogays                      | 77  | 0  | 0 | 7  | This study      |
| Tats                            | 10  | 0  | 0 | 0  | This study      |

**Table S2. Frequencies of haplogroup R1a1a\* and R1a1a7\***

| Population/Region                           | N   | Frequency % |               |         | Reference      |
|---------------------------------------------|-----|-------------|---------------|---------|----------------|
|                                             |     | R1a1a total | R1a1a*(xM458) | R1a1a7* |                |
| <b>Western Europe</b>                       |     |             |               |         |                |
| Norway                                      | 74  | 23.0        | 23.0          | 0       | This study     |
| Sweden South (Malmö)                        | 141 | 18.4        | 16.3          | 2.1     | This study     |
| Denmark East                                | 17  | 5.9         | 5.9           | 0       | This study     |
| Denmark Island (East)                       | 10  | 10.0        | 10.0          | 0       | This study     |
| Denmark North                               | 43  | 11.6        | 11.6          | 0       | This study     |
| Denmark West                                | 19  | 15.8        | 15.8          | 0       | This study     |
| Denmark Southeast                           | 23  | 13.0        | 8.7           | 4.3     | This study     |
| Netherlands West                            | 47  | 4.3         | 0             | 4.3     | This study     |
| Netherlands North                           | 22  | 9.1         | 9.1           | 0       | This study     |
| Netherlands Southeast                       | 19  | 5.3         | 5.3           | 0       | This study     |
| Ireland East                                | 16  | 6.3         | 6.3           | 0       | This study     |
| Ireland North                               | 21  | 9.5         | 9.5           | 0       | This study     |
| Ireland South                               | 24  | 0           | 0             | 0       | This study     |
| Ireland Southwest                           | 22  | 0           | 0             | 0       | This study     |
| Ireland West                                | 16  | 0           | 0             | 0       | This study     |
| England Central                             | 25  | 0           | 0             | 0       | This study     |
| England North                               | 29  | 3.4         | 3.4           | 0       | This study     |
| England Southeast                           | 25  | 0           | 0             | 0       | This study     |
| England Southwest                           | 25  | 0           | 0             | 0       | This study     |
| France East                                 | 25  | 4.0         | 4.0           | 0       | This study     |
| France                                      | 16  | 0           | 0             | 0       | This study     |
| France West                                 | 14  | 0           | 0             | 0       | This study     |
| France, HGDP-CEPH                           | 12  | 0           | 0             | 0       | This study     |
| Spain, Andalusia                            | 29  | 0           | 0             | 0       | 15             |
| Germany                                     | 16  | 6.3         | 6.3           | 0       | This study     |
| Germany West                                | 100 | 5.0         | 5.0           | 0       | This study     |
| Germany East                                | 47  | 29.8        | 19.1          | 10.6    | This study     |
| Germany South                               | 91  | 11.0        | 4.4           | 6.6     | This study     |
| Germany Central                             | 19  | 15.8        | 5.3           | 10.5    | This study     |
| Germany North                               | 65  | 15.4        | 12.3          | 3.1     | This study     |
| Austria                                     | 19  | 26.3        | 21.1          | 5.3     | This study     |
| Switzerland Northeast                       | 32  | 6.3         | 6.3           | 0.0     | This study     |
| Switzerland Northwest                       | 27  | 3.7         | 3.7           | 0.0     | This study     |
| Switzerland South                           | 16  | 0           | 0             | 0       | This study     |
| Switzerland                                 | 16  | 0           | 0             | 0       | This study     |
| <b>Central, Eastern and Northern Europe</b> |     |             |               |         |                |
| Poland (Zamosc)                             | 98  | 57.1        | 20.4          | 36.7    | Updated from 8 |
| Poland Southwest (Wroclaw)                  | 93  | 55.9        | 32.3          | 23.7    | This study     |
| Poland Central                              | 42  | 47.6        | 14.3          | 33.3    | This study     |
| Poland South                                | 22  | 50.0        | 13.6          | 36.4    | This study     |
| Poland North                                | 17  | 52.9        | 29.4          | 23.5    | This study     |
| Poland West                                 | 15  | 26.7        | 20.0          | 6.7     | This study     |
| Poland East                                 | 13  | 46.2        | 30.8          | 15.4    | This study     |
| Ukraine Central-eastern (Dneprovskii)       | 114 | 43.9        | 21.1          | 22.8    | This study     |
| Ukraine West (Lvov, Ivanovo-Frankovsk)      | 157 | 43.3        | 27.4          | 15.9    | This study     |
| Ukraine Western-central (Hmel'nitsk)        | 179 | 49.2        | 41.3          | 7.8     | This study     |
| Ukraine Southeast (Donetsk)                 | 93  | 34.4        | 23.7          | 10.8    | Updated from 8 |
| Ukraine East (Belgorod)                     | 56  | 46.4        | 41.1          | 5.4     | This study     |
| Ukraine Central                             | 28  | 17.9        | 10.7          | 7.1     | This study     |
| Belorussia Central                          | 50  | 42.0        | 38.0          | 4.0     | This study     |
| Belorussia West (Brest)                     | 97  | 58.8        | 36.1          | 22.7    | This study     |
| Belorussia Northeast (Vitebsk)              | 100 | 60.0        | 47.0          | 13.0    | This study     |
| Czech Republic (2 locations)                | 88  | 34.1        | 8.0           | 26.1    | This study     |
| Slovakia (Bratislava)                       | 82  | 45.1        | 18.3          | 26.8    | This study     |
| Slovakia West                               | 109 | 44.0        | 25.7          | 18.3    | This study     |

|                                    |     |      |      |      |                 |
|------------------------------------|-----|------|------|------|-----------------|
| Slovakia East                      | 38  | 52.6 | 34.2 | 18.4 | This study      |
| Slovakia South                     | 23  | 60.9 | 39.1 | 21.7 | This study      |
| Slovakia North                     | 22  | 45.5 | 31.8 | 13.6 | This study      |
| Hungary                            | 113 | 20.4 | 15.9 | 4.4  | Updated from 16 |
| Slovenia (2 locations)             | 180 | 30.0 | 27.2 | 2.8  | This study      |
| Russians Russia South (Belgorod)   | 143 | 62.2 | 50.3 | 11.9 | Updated from 17 |
| Russians Russia Central (Kostroma) | 52  | 30.8 | 19.2 | 11.5 | Updated from 17 |
| Russians Russia Central (Pskov)    | 132 | 47.0 | 34.8 | 12.1 | Updated from 17 |
| Russians Russia South (Orel)       | 110 | 61.8 | 47.3 | 14.5 | Updated from 17 |
| Russians Russia Southwest          | 22  | 27.3 | 13.6 | 13.6 | This study      |
| Russians Russia Northwest          | 14  | 42.9 | 28.6 | 14.3 | This study      |
| Estonia                            | 210 | 34.3 | 28.6 | 5.7  | This study      |
| Karelians (Russia)                 | 140 | 40.7 | 27.1 | 13.6 | This study      |
| Vepsa (Russia)                     | 39  | 38.5 | 23.1 | 15.4 | This study      |
| <b>Circum-Uralic region</b>        |     |      |      |      |                 |
| Chuvashis (Russia)                 | 117 | 25.6 | 25.6 | 0    | This study      |
| Bashkirs (Russia)                  | 126 | 28.6 | 28.6 | 0    | This study      |
| Maris (Russia)                     | 49  | 26.5 | 26.5 | 0    | This study      |
| Komis-permyans (Russia)            | 60  | 36.7 | 36.7 | 0    | This study      |
| Komis (Russia)                     | 52  | 5.8  | 1.9  | 3.8  | This study      |
| Tatars from Bashkortostan (Russia) | 39  | 15.4 | 12.8 | 2.6  | This study      |
| Tatars from Tatarstan (Russia)     | 66  | 39.4 | 34.8 | 4.5  | This study      |
| Udmurts (Russia)                   | 141 | 18.4 | 16.3 | 2.1  | This study      |
| <b>South-eastern Europe</b>        |     |      |      |      |                 |
| Croatia mainland                   | 108 | 26.9 | 24.1 | 2.8  | Updated from 17 |
| Croats Osijek (Croatia)            | 29  | 37.9 | 37.9 | 0    | Updated from 8  |
| Croats Split (Croatia)             | 89  | 25.8 | 16.9 | 9.0  | Updated from 8  |
| Croatia Krk Island                 | 74  | 36.5 | 24.3 | 12.2 | Updated from 17 |
| Croatia Korcula Island             | 134 | 15.7 | 12.7 | 3.0  | Updated from 17 |
| Croatia Brac Island                | 49  | 24.5 | 22.4 | 2.0  | Updated from 17 |
| Croatia Hvar Island                | 91  | 6.6  | 6.6  | 0    | Updated from 17 |
| Croats, Bosnia                     | 90  | 12.2 | 7.8  | 4.4  | Updated from 8  |
| Bosnia (2 locations)               | 163 | 23.3 | 12.9 | 8.6  | Updated from 8  |
| Serbs, Bosnia                      | 83  | 13.3 | 8.4  | 4.8  | Updated from 8  |
| Serbia                             | 113 | 15.9 | 12.4 | 3.5  | Updated from 18 |
| Albanians, Kosovo                  | 114 | 3.5  | 3.5  | 0    | Updated from 18 |
| Montenegro                         | 103 | 6.8  | 6.8  | 0    | This study      |
| Herzegovina                        | 141 | 12.1 | 11.3 | 0.7  | Updated from 18 |
| FYROM, Macedonia                   | 79  | 13.9 | 10.1 | 3.8  | Updated from 18 |
| Albania                            | 55  | 10.9 | 5.5  | 5.5  | Updated from 8  |
| Greece (2 locations)               | 263 | 12.9 | 9.1  | 4.2  | Updated from 8  |
| Greeks, Macedonia                  | 57  | 12.8 | 1.8  | 8.8  | Updated from 8  |
| Crete                              | 193 | 8.8  | 7.8  | 1.0  | Updated from 3  |
| Crete                              | 168 | 10.7 | 7.1  | 3.6  | Updated from 2  |
| Romania                            | 335 | 17.0 | 11.6 | 5.4  | This study      |
| Italy South (2 locations)          | 163 | 1.8  | 1.8  | 0    | This study      |
| Italy North                        | 124 | 6.5  | 6.5  | 0    | This study      |
| Italy Northeast                    | 64  | 7.8  | 7.8  | 0    | Updated from 8  |
| <b>Caucasus Northern</b>           |     |      |      |      |                 |
| Osetins North                      | 134 | 0.7  | 0.7  | 0    | This study      |
| Karachays                          | 69  | 27.5 | 27.5 | 0    | This study      |
| Avars                              | 42  | 2.4  | 2.4  | 0    | This study      |
| Chamalals                          | 27  | 7.4  | 7.4  | 0    | This study      |
| Bagvalals                          | 28  | 3.6  | 3.6  | 0    | This study      |
| Andis                              | 49  | 2.0  | 2.0  | 0    | This study      |
| Lezgis                             | 31  | 0    | 0    | 0    | This study      |
| Darginians                         | 68  | 0    | 0    | 0    | This study      |
| Tabasarans                         | 43  | 2.3  | 2.3  | 0    | This study      |
| Karanogays                         | 77  | 9.1  | 1.3  | 7.8  | This study      |

|                                              |     |      |      |     |                 |
|----------------------------------------------|-----|------|------|-----|-----------------|
| Abazas                                       | 89  | 19.1 | 15.7 | 3.4 | This study      |
| Adygghes                                     | 160 | 11.3 | 9.4  | 1.9 | This study      |
| Balkars                                      | 136 | 25.7 | 23.5 | 2.2 | This study      |
| Cherkessians                                 | 126 | 12.7 | 10.3 | 2.4 | This study      |
| Kabardinians                                 | 141 | 14.2 | 13.5 | 0.7 | This study      |
| Nogays                                       | 87  | 12.6 | 11.5 | 1.1 | This study      |
| Kumyks                                       | 76  | 13.2 | 11.8 | 1.3 | This study      |
| <b>Caucasus Southern</b>                     |     |      |      |     |                 |
| Osetins South                                | 23  | 4.3  | 4.3  | 0   | This study      |
| Armenians                                    | 25  | 4.0  | 4.0  | 0   | This study      |
| Abkhazes                                     | 162 | 9.3  | 8.6  | 0.6 | This study      |
| Megrels                                      | 67  | 9.0  | 7.5  | 1.5 | This study      |
| Georgians Tbilisi (Georgia)                  | 65  | 10.8 | 9.2  | 1.5 | Updated from 8  |
| <b>Near, Middle East, India</b>              |     |      |      |     |                 |
| Turkey West                                  | 163 | 6.1  | 5.5  | 0.6 | Updated from 14 |
| Turkey Central                               | 152 | 3.3  | 2.6  | 0.7 | Updated from 14 |
| Turkey East                                  | 208 | 8.7  | 8.2  | 0.5 | Updated from 14 |
| Egypt                                        | 147 | 2.7  | 2.7  | 0   | This study      |
| Oman                                         | 121 | 9.1  | 9.1  | 0   | This study      |
| Jordan                                       | 76  | 5.3  | 5.3  | 0   | This study      |
| Palestine                                    | 49  | 0    | 0    | 0   | This study      |
| Yemen                                        | 62  | 0    | 0    | 0   | 12              |
| Iran                                         | 150 | 14.0 | 14.0 | 0   | Updated from 11 |
| Iran                                         | 87  | 10.3 | 10.3 | 0   | This study      |
| Pakistan North                               | 85  | 16.5 | 16.5 | 0   | Updated from 9  |
| Pakistan South                               | 91  | 24.2 | 24.2 | 0   | Updated from 9  |
| India, Central Uttar Pradesh Brahmins, Caste | 68  | 39.7 | 39.7 | 0   | This study      |
| India, Maharashtra, Tribe                    | 210 | 14.3 | 14.3 | 0   | This study      |
| <b>Central Asia, South Siberia</b>           |     |      |      |     |                 |
| Turkmens, Tajiks                             | 38  | 7.9  | 7.9  | 0   | This study      |
| Uzbekistan                                   | 54  | 13.0 | 13.0 | 0   | This study      |
| Kazahs, Kazakstan                            | 133 | 1.5  | 1.5  | 0   | This study      |
| Kurds (sampled in Kazakstan)                 | 23  | 30.4 | 30.4 | 0   | This study      |
| Altaians (Russia)                            | 61  | 39.3 | 39.3 | 0   | This study      |
| Tuvas (Russia)                               | 103 | 7.8  | 7.8  | 0   | This study      |
| Khakassians (Russia)                         | 76  | 34.2 | 32.9 | 1.3 | This study      |
| Kyrgyzstan                                   | 154 | 50.0 | 50.0 | 0   | This study      |

**Table S3. Frequencies of Y chromosome haplogroups R1a1a-M17 and R1a1a6-M434.**

| Population or country/territory     | N   | R1a1a-M17 frequency | R1a1a6-M434 frequency | Reference |    |            |
|-------------------------------------|-----|---------------------|-----------------------|-----------|----|------------|
| <b>Pakistan</b>                     |     |                     |                       |           |    |            |
| Baloch                              | 60  | 9                   | 15%                   | 5         | 8% | This study |
| Balti                               | 13  | 6                   | 46%                   | 0         |    | This study |
| Brahui                              | 111 | 39                  | 35%                   | 0         |    | This study |
| Burusho                             | 96  | 24                  | 25%                   | 0         |    | This study |
| Hazara                              | 29  | 0                   |                       | 0         |    | This study |
| Kalash                              | 44  | 8                   | 18%                   | 0         |    | This study |
| Kashmiri                            | 10  | 5                   | 50%                   | 0         |    | This study |
| Makrani                             | 60  | 15                  | 25%                   | 4         | 7% | This study |
| Mohanna                             | 70  | 50                  | 71%                   | 0         |    | This study |
| Parsi                               | 90  | 7                   | 8%                    | 0         |    | This study |
| Pathan                              | 96  | 43                  | 45%                   | 0         |    | This study |
| Rajput                              | 10  | 6                   | 60%                   | 0         |    | This study |
| Sindhi                              | 134 | 65                  | 49%                   | 2         | 1% | This study |
| Syed                                | 31  | 4                   | 13%                   | 0         |    | This study |
| <b>India</b>                        |     |                     |                       |           |    |            |
| <b><i>Punjab/Haryana</i></b>        |     |                     |                       |           |    |            |
| Ahir                                | 24  | 15                  | 63%                   | 0         |    | This study |
| Balmiki                             | 24  | 8                   | 33%                   | 0         |    | This study |
| Khatri                              | 15  | 10                  | 67%                   | 0         |    | This study |
| <b><i>Gujarat</i></b>               |     |                     |                       |           |    |            |
| Brahmins                            | 16  | 3                   | 19%                   | 0         |    | This study |
| Scheduled Castes                    | 9   | 3                   | 33%                   | 0         |    | This study |
| Rabari                              | 34  | 11                  | 32%                   | 0         |    | This study |
| Vasava                              | 50  | 5                   | 10%                   | 0         |    | This study |
| Tadvi                               | 50  | 7                   | 14%                   | 0         |    | This study |
| Bhil                                | 50  | 8                   | 16%                   | 0         |    | This study |
| Dungari Bhil                        | 50  | 13                  | 26%                   | 0         |    | This study |
| Kathodi                             | 15  | 6                   | 40%                   | 0         |    | This study |
| Dungari Grassia                     | 51  | 15                  | 29%                   | 0         |    | This study |
| Rathawa                             | 49  | 3                   | 6%                    | 0         |    | This study |
| Koli                                | 24  | 5                   | 21%                   | 0         |    | This study |
| Bhanusali                           | 6   | 4                   | 67%                   | 0         |    | This study |
| Lohana                              | 20  | 12                  | 60%                   | 0         |    | This study |
| <b><i>Rajasthan</i></b>             |     |                     |                       |           |    |            |
| Meena                               | 80  | 23                  | 29%                   | 0         |    | This study |
| Meena                               | 56  | 21                  | 38%                   | 0         |    | This study |
| Meghwal                             | 50  | 15                  | 30%                   | 0         |    | This study |
| Bhill                               | 50  | 9                   | 18%                   | 0         |    | This study |
| <b><i>Other states of India</i></b> |     |                     |                       |           |    |            |
| Birhor                              | 15  | 1                   | 7%                    | 0         |    | This study |
| Chakma                              | 20  | 0                   |                       | 0         |    | This study |
| Darlong                             | 24  | 0                   |                       | 0         |    | This study |
| Gadaba                              | 27  | 0                   |                       | 0         |    | This study |
| Kuruman                             | 21  | 1                   | 5%                    | 0         |    | This study |
| Meo                                 | 16  | 5                   | 31%                   | 0         |    | This study |
| Malayali                            | 18  | 2                   | 11%                   | 0         |    | This study |

|            |    |   |     |   |            |
|------------|----|---|-----|---|------------|
| Manipuri   | 6  | 3 | 50% | 0 | This study |
| Nicobarese | 17 | 0 |     | 0 | This study |
| Patel      | 12 | 1 | 8%  | 0 | This study |
| Riang      | 22 | 0 |     | 0 | This study |
| Sholiga    | 16 | 0 |     | 0 | This study |
| Tharu      | 16 | 0 |     | 0 | This study |
| Tharu-Rana | 16 | 3 | 19% | 0 | This study |
| Urali      | 11 | 0 |     | 0 | This study |

### Europe & MidEast

|                         |     |    |     |   |                      |
|-------------------------|-----|----|-----|---|----------------------|
| Greece                  | 171 | 19 |     | 0 | Updated from 3       |
| Egypt                   | 147 | 4  |     | 0 | Updated from 10      |
| Oman                    | 121 | 11 |     | 3 | 2.5% Updated from 10 |
| Turkey                  | 523 | 36 |     | 0 | Updated from 14      |
| Iran                    | 150 | 19 |     | 0 | Updated from 11      |
| Tibet                   | 156 | 3  |     | 0 | Updated from 19      |
| Nepal                   | 188 | 46 |     | 0 | Updated from 19      |
| Crete                   | 361 | 34 | 9.4 | 0 | Updated from 2;3     |
| Assyrians               | 88  | 1  |     | 0 | This study           |
| Bedouin (HGDP-CEPH)     | 28  | 2  |     | 0 | This study           |
| Uyгур,China (HGDP-CEPH) | 8   | 2  |     |   | This study           |
| Tu, China (HGDP-CEPH)   | 7   | 1  |     |   | This study           |
| Tajekistan              | 24  | 3  |     | 0 | This study           |
| UAE                     | 164 | 12 | 6.9 | 0 | Updated from 12      |
| Qatar                   | 72  | 5  | 7.3 | 0 | Updated from 12      |

**Table S4. Coalescent times and median haplotypes of haplogroup R1a1a\* and R1a1a7\* by populations.**

|                          | R1a1a* |                |     | M458A median haplotypes by population |      |       |        |      |      |      |      |      |      | R1a1a7* |                |     | M458G median haplotypes by population |      |       |        |      |      |      |      |      |      |
|--------------------------|--------|----------------|-----|---------------------------------------|------|-------|--------|------|------|------|------|------|------|---------|----------------|-----|---------------------------------------|------|-------|--------|------|------|------|------|------|------|
|                          | N      | T <sub>D</sub> | SE  | D19                                   | D388 | D389I | D389II | D390 | D391 | D392 | D393 | D439 | A7.2 | N       | T <sub>D</sub> | SE  | D19                                   | D388 | D389I | D389II | D390 | D391 | D392 | D393 | D439 | A7.2 |
| Karelia                  | n.d.   |                |     |                                       |      |       |        |      |      |      |      |      |      | 12      | 3              | 1.8 | 16                                    | 12   | 13    | 16     | 25   | 10   | 11   | 13   | 11   | 10   |
| Vepsa                    | n.d.   |                |     |                                       |      |       |        |      |      |      |      |      |      | 6       | 2.4            | 1   | 16                                    | 12   | 13    | 16     | 25   | 10   | 11   | 13   | 11   | 10   |
| Estonia                  | 14     | 8              | 1.9 | 16                                    | 12   | 13    | 17     | 25   | 11   | 11   | 13   | 10   | 10   | 11      | 6.3            | 3.5 | 15                                    | 12   | 13    | 16     | 25   | 10   | 11   | 13   | 11   | 10   |
| Ukraine                  | 18     | 7.4            | 2.1 | 16                                    | 12   | 13    | 17     | 25   | 11   | 11   | 13   | 10   | 10   | 7       | 4.7            | 1.8 | 16                                    | 12   | 13    | 16     | 25   | 10   | 11   | 13   | 11   | 10   |
| Russia                   | 10     | 8.7            | 3.4 | 16                                    | 12   | 13    | 17     | 25   | 11   | 11   | 13   | 10   | 10   | 12      | 8              | 2.9 | 16                                    | 12   | 13    | 16     | 24   | 10   | 11   | 13   | 11   | 10   |
| Hungary                  | 15     | 9.2            | 2.5 | 16                                    | 12   | 13    | 17     | 25   | 11   | 11   | 13   | 10   | 10   | 5       | 6.5            | 2.8 | 17                                    | 12   | 13    | 17     | 25   | 10   | 11   | 13   | 11   | 10   |
| Germany                  | 28     | 9.9            | 2.8 | 16                                    | 12   | 13    | 17     | 25   | 11   | 11   | 13   | 10   | 10   | 15      | 7.5            | 2.3 | 16                                    | 12   | 13    | 16     | 25   | 10   | 11   | 13   | 11   | 10   |
| Denmark                  | 12     | 9.7            | 2.8 | 15                                    | 12   | 13    | 17     | 25   | 11   | 11   | 13   | 10   | 10   | 1       |                |     |                                       |      |       |        |      |      |      |      |      |      |
| Czech Rep.               | 3      |                |     |                                       |      |       |        |      |      |      |      |      |      | 7       | 5.7            | 2.1 | 16                                    | 12   | 13    | 17     | 25   | 10   | 11   | 13   | 11   | 10   |
| Slovakia                 | 70     | 11.2           | 2.7 | 16                                    | 12   | 13    | 17     | 25   | 11   | 11   | 13   | 10   | 10   | 56      | 8.3            | 2.6 | 16                                    | 12   | 13    | 17     | 25   | 10   | 11   | 13   | 11   | 10   |
| Poland                   | 19     | 11.3           | 3.7 | 16                                    | 12   | 13    | 17     | 25   | 11   | 11   | 13   | 10   | 10   | 27      | 10.7           | 4.1 | 17                                    | 12   | 13    | 17     | 25   | 10   | 11   | 13   | 10   | 10   |
| Slovenia                 | 33     | 6.9            | 1.6 | 16                                    | 12   | 13    | 17     | 25   | 10   | 11   | 13   | 10   | 10   | 3       |                |     |                                       |      |       |        |      |      |      |      |      |      |
| Greece                   | 13     | 7.8            | 2.4 | 16                                    | 12   | 13    | 17     | 25   | 11   | 11   | 13   | 10   | 10   | 6       | 0.6            | 0.6 | 16                                    | 12   | 13    | 16     | 25   | 10   | 11   | 13   | 11   | 10   |
| Italy                    | 8      | 5.9            | 1.8 | 16                                    | 12   | 13    | 18     | 25   | 10   | 11   | 13   | 10   | 10   | 0       |                |     |                                       |      |       |        |      |      |      |      |      |      |
| Croatia                  | n.d.   |                |     |                                       |      |       |        |      |      |      |      |      |      | 18      | 5.3            | 1.9 | 16                                    | 12   | 13    | 16     | 25   | 10   | 11   | 13   | 11   | 10   |
| Crete                    | 12     | 11.2           | 3.1 | 16                                    | 12   | 13    | 17     | 25   | 11   | 11   | 13   | 10   | 10   | 7       | 6.6            | 2.5 | 16                                    | 12   | 13    | 16     | 25   | 10   | 11   | 13   | 11   | 10   |
| Turkey                   | 34     | 9.3            | 2.4 | 16                                    | 12   | 13    | 17     | 25   | 11   | 11   | 13   | 10   | 10   | 3       | 3.6            | 1.8 | 16                                    | 12   | 13    | 16     | 25   | 10   | 11   | 13   | 11   | 10   |
| Nepal <sup>1</sup>       | 48     | 14.2           | 4.3 | 16                                    | 12   | 13    | 18     | 25   | 11   | 11   | 13   | 10   | 10   | 0       |                |     |                                       |      |       |        |      |      |      |      |      |      |
| Altay, Tuva              | 17     | 8.1            | 2.6 | 16                                    | 12   | 14    | 17     | 26   | 11   | 11   | 13   | 11   | 10   | 0       |                |     |                                       |      |       |        |      |      |      |      |      |      |
| Caucasus                 | 11     | 12.2           | 3.4 | 15                                    | 12   | 13    | 17     | 25   | 11   | 11   | 13   | 10   | 10   | 23      | 7.9            | 2.2 | 16                                    | 12   | 13    | 16     | 25   | 10   | 11   | 13   | 11   | 10   |
| Oman                     | 11     | 12.5           | 2.9 | 16                                    | 12   | 13    | 17     | 25   | 11   | 11   | 13   | 10   | 10   | 0       |                |     |                                       |      |       |        |      |      |      |      |      |      |
| UAE                      | 12     | 9.7            | 4.2 | 16                                    | 12   | 13    | 17     | 25   | 11   | 11   | 13   | 10   | 10   | 0       |                |     |                                       |      |       |        |      |      |      |      |      |      |
| Iran                     | 25     | 9.4            | 2.9 | 16                                    | 12   | 13    | 17     | 25   | 11   | 11   | 13   | 10   | 10   | 0       |                |     |                                       |      |       |        |      |      |      |      |      |      |
| Pakistan                 | 43     | 15.0           | 3.0 | 16                                    | 12   | 13    | 17     | 25   | 11   | 11   | 13   | 10   | 10   | 0       |                |     |                                       |      |       |        |      |      |      |      |      |      |
| Kyrgyzstan               | 66     | 5.6            | 1.8 | 16                                    | 12   | 14    | 18     | 25   | 11   | 11   | 13   | 10   | 10   | 0       |                |     |                                       |      |       |        |      |      |      |      |      |      |
| India sum <sup>2</sup>   | 113    | 14.0           | 3.1 | 15                                    | 12   | 13    | 17     | 25   | 10   | 11   | 13   | 10   | 10   |         |                |     |                                       |      |       |        |      |      |      |      |      |      |
| India East <sup>2</sup>  | 19     | 11.8           | 3.1 | 16                                    | 12   | 14    | 17     | 25   | 11   | 11   | 13   | 10   | 10   |         |                |     |                                       |      |       |        |      |      |      |      |      |      |
| India North <sup>2</sup> | 32     | 12.4           | 3.4 | 15                                    | 12   | 13    | 18     | 25   | 11   | 11   | 13   | 10   | 10   |         |                |     |                                       |      |       |        |      |      |      |      |      |      |
| India South <sup>2</sup> | 39     | 12.3           | 3.1 | 15                                    | 12   | 13    | 17     | 25   | 10   | 11   | 13   | 10   | 10   |         |                |     |                                       |      |       |        |      |      |      |      |      |      |
| India West <sup>2</sup>  | 17     | 15.8           | 4.7 | 15                                    | 12   | 13    | 18     | 25   | 10   | 11   | 13   | 10   | 10   |         |                |     |                                       |      |       |        |      |      |      |      |      |      |
| Other populations        | 25     |                |     |                                       |      |       |        |      |      |      |      |      |      | 5       |                |     |                                       |      |       |        |      |      |      |      |      |      |
| Total                    | 660    | 12.7           | 2.6 | 16                                    | 12   | 13    | 17     | 25   | 11   | 11   | 13   | 10   | 10   | 224     | 7.9            | 2.6 | 16                                    | 12   | 13    | 16     | 25   | 10   | 11   | 13   | 11   | 10   |

T<sub>D</sub> time estimates (in ky) calculated for N>5, according to the method described in Zhivotovsky et al. 2004(20) assuming mutation rate (6.9 x 10<sup>-4</sup> per 25 years) assuming a founder at the median haplotype estimated for each individual population (9).

1 - Data from 19

2 - Data from 9



Table S5: Description of R1a associated SNPs

| Marker | reference<br>nosequence<br>number | hg      | nucleoti<br>de<br>change | amplico<br>n size<br>(bp) | SNP<br>position<br>from 5'<br>end | Primer forward 5'-3'     | Primer reverse 5'-3'      | reference  |
|--------|-----------------------------------|---------|--------------------------|---------------------------|-----------------------------------|--------------------------|---------------------------|------------|
| M417   | rs17316771                        | R1a1a*  | G to A                   | 283                       | 153                               | TGCAGAAAGAAGAGGAGGACAGCC | CATGTGTAGTTGGGGGACCACATCC | 21         |
| M420   | rs17250535                        | R1a*    | T to A                   | 275                       | 26                                | GGCAAACTTTTTCATTGCTGG    | CTAAAAAACTTAACCCATCACAC   | 21         |
| M448   | rs17222202                        | R1a1*   | T to A                   | 317                       | 107                               | GTGAGAAAGAGAAATGCCAGG    | GACATACATCCTCTGTTCCC      | 21         |
| M449   | rs17306692                        | R1a*    | C to A                   | 317                       | 138                               | TCAACCAACAATTTGCAACCC    | TCTGTGAGCAAGGTGACAGC      | 21         |
| M459   | rs17316227                        | R1a1*   | A to G                   | 316                       | 149                               | TGAAGATGCAAACCAGCACG     | CAATAGTCTCACAAGAGAAGAAATG | 21         |
| M511   | rs17307677                        | R1a*    | T to C                   | 322                       | 264                               | GGATGAATTGATGAAGAGATGT   | CTCAGAGAAAAGACATTTTCAG    | 21         |
| M512   | rs17222146                        | R1a1a*  | C to T                   | 356                       | 161                               | TGTTCCCTCTGTGAGACTGAGC   | CAGAACCATGTCATATCAGG      | 21         |
| M513   | rs17222573                        | R1a*    | A to G                   | 319                       | 137                               | GAGATCTTCACTGTCTTTTTAC   | GTGTATTTGAAATGGTTCAGGTG   | 21         |
| M514   | rs17315926                        | R1a1a*  | C to T                   | 377                       | 245                               | CTTTTTCTTATGACAAGATTTT   | GAATACCTGTTGTATCTTAGC     | 21         |
| M515   | rs17221601                        | R1a1a*  | T to A                   | 233                       | 112                               | GTATTGTCCATATAAGGTCTCTG  | CCAAAGTGCTGGAATTACAGATG   | 21         |
| M516   | rs17307105                        | R1a1*   | A to G                   | 263                       | 173                               | CTTCTGAACATAAGTGTTTCAGG  | AGTCTGGTTTTGGTTAAAAGC     | 21         |
| none   | rs17250901                        | NT      | A to T                   | 380                       | 272                               | AGAAGAGATTTCTAGCCAGAGT   | GGGGTAGAAAATTATTGGTC      | 21         |
| Page07 | rs34297606                        | R1a1a*  | C to T                   | 333                       | 62                                | CTGACCCCTGACTCCAAGCA     | AAAAAAGAAAATGGGGACTCACTG  | 22         |
| Page68 | rs34351054                        | R1a1a8  | C to T                   | 340                       | 41                                | AGAATTGCTTGAACCTCTCAGAC  | GAGATACCTGGAGGTGAGAAG     | 22         |
| M334   | unassigned                        | R1a1a7a | C to A                   | 499                       | 356                               | CCTTGGCATTTTGTGGGCTGG    | AAAGGGGGCCTGAGTGAGCACT    | this study |
| M434   | unassigned                        | R1a1a6  | G to A                   | 325*                      | 213                               | CCAAAATTAGTGGGGAATAGT    | GATCACCCAGGGTCTGGAGTT     | this study |
| M458   | unassigned                        | R1a1a7* | A to G                   | 283                       | 87                                | AGAAGAGATTTCTAGCCAGAGT   | CCAGAAAAAATAATTCCTGGA     | this study |

\* amplicon size varies since it contains DYS438 pentanucleotide locus

NT=not typed

## Literature Cited in Supplementary Tables S1-S5

1. Weale ME, *et al.* (2001) Armenian Y chromosome haplotypes reveal strong regional structure within a single ethno-national group. *Hum Genet* Online publication.(Online publication.):1-11.
2. Martinez *et al.* (2007) Paleolithic Y-haplogroup heritage predominates in a Cretan highland plateau. *Eur J Hum Genet* 15(1): 121-126
3. King RJ, *et al.* (2008) Differential Y-chromosome Anatolian influences on the Greek and Cretan Neolithic. *Ann Hum Genet* 72(Pt 2):205-214.
4. Lappalainen T, *et al.* (2006) Regional differences among the Finns: a Y-chromosomal perspective. *Gene* 376(2):207-215.
5. Brion *et al.* (2005) A collaborative study of the EDNAP group regarding Y-chromosome binary polymorphism analysis. *Forensic Sci Int* 153 (2-3): :103–108.
6. Karlsson AO, Wallerström T, Gotherström A, & Holmlund G (2006) Y-chromosome diversity in Sweden - a long-time perspective. *Eur J Hum Genet* 14(8):963-970.
7. Lappalainen T, *et al.* (2008) Migration waves to the Baltic Sea region. *Ann Hum Genet* 72(Pt 3):337-348.
8. Battaglia *et al.* (2009) Y-Chromosomal Evidence of the Cultural Diffusion of Agriculture in Southeast Europe. *Eur J Hum Genet* 17(6): 820-830.
9. Sengupta S, *et al.* (2006) Polarity and temporality of high-resolution Y-chromosome distributions in India identify both indigenous and exogenous expansions and reveal minor genetic influence of Central Asian pastoralists. *Am J Hum Genet* 78(2):202-221.
10. Luis JR, *et al.* (2004) The Levant versus the Horn of Africa: evidence for bidirectional corridors of human migrations. *Am J Hum Genet* 74:532-544.
11. Regueiro M, Cadenas AM, Gayden T, Underhill PA, & Herrera RJ (2006) Iran: tricontinental nexus for Y-chromosome driven migration. *Hum Hered* 61(3):132-143.
12. Cadenas AM, Zhivotovsky LA, Cavalli-Sforza LL, Underhill PA, & Herrera RJ (2008) Y-chromosome diversity characterizes the Gulf of Oman. *Eur J Hum Genet.* 16(3):374-386.
13. Zalloa *et al.* (2008) Y-Chromosomal Diversity in Lebanon Is Structured by Recent Historical Events. *Am J Hum Genet.* 82: 873–882.
14. Cinnioglu C, *et al.* (2004) Excavating Y-chromosome haplotype strata in Anatolia. *Hum Genet.* 114(2):127-148.
15. Semino O, *et al.* (2000) The genetic legacy of Paleolithic Homo sapiens sapiens in extant Europeans: a Y chromosome perspective. *Science* 290(5494):1155-1159.
16. Tambets *et al.* (2004) The western and eastern roots of the Saami--the story of genetic "outliers" told by mitochondrial DNA and Y chromosomes. *Am J Hum Genet.* 74(4):661-82.
17. Barać *et al.* (2003) Y chromosomal heritage of Croatian population and its island isolates. *Eur J Hum Genet.* 11(7):535-42.
18. Perić *et al.* (2005) High-resolution phylogenetic analysis of southeastern Europe traces major episodes of paternal gene flow among Slavic populations. *Mol Biol Evol.* 22(10):1964-75.

19. Gayden *et al.* (2007) The Himalayas as a Directional Barrier to Gene Flow. *Am J Hum Genet.* 80:884–894.
20. Zhivotovsky LA, *et al.* (2004) The effective mutation rate at Y chromosome short tandem repeats, with application to human population-divergence time. *Am J Hum Genet* 74(1):50-61.
21. Hinds DA, *et al.* (2005) Whole-genome patterns of common DNA variation in three human populations. *Science* 307(5712):1072-1079.
22. Repping S, *et al.* (2006) High mutation rates have driven extensive structural polymorphism among human Y chromosomes. *Nat Genet* 38(4):463-467.

**Table S 6**

| Population | Haplogroup | DYS19 | DYS388 | DYS389I | DYS389B | DYS390 | DYS391 | DYS392 | DYS393 | DYS439 | DYS461 |
|------------|------------|-------|--------|---------|---------|--------|--------|--------|--------|--------|--------|
| Adygei     | R1a1a*     | 16    | 12     | 12      | 17      | 25     | 11     | 11     | 13     | 11     | 10     |
| Altay      | R1a1a*     | 16    | 12     | 14      | 17      | 26     | 11     | 11     | 13     | 11     | 10     |
| Altay      | R1a1a*     | 16    | 12     | 14      | 17      | 26     | 11     | 11     | 13     | 11     | 10     |
| Altay      | R1a1a*     | 16    | 12     | 14      | 17      | 26     | 11     | 11     | 13     | 11     | 10     |
| Altay      | R1a1a*     | 16    | 12     | 14      | 17      | 25     | 11     | 11     | 13     | 11     | 10     |
| Altay      | R1a1a*     | 16    | 12     | 14      | 17      | 26     | 11     | 11     | 13     | 11     | 10     |
| Altay      | R1a1a*     | 16    | 12     | 14      | 17      | 26     | 11     | 11     | 13     | 11     | 10     |
| Altay      | R1a1a*     | 16    | 12     | 14      | 17      | 26     | 11     | 11     | 13     | 11     | 10     |
| Altay      | R1a1a*     | 16    | 12     | 14      | 18      | 26     | 11     | 11     | 13     | 11     | 10     |
| Altay      | R1a1a*     | 16    | 12     | 14      | 18      | 25     | 11     | 11     | 13     | 11     | 10     |
| Altay      | R1a1a*     | 16    | 12     | 14      | 18      | 26     | 11     | 11     | 13     | 11     | 10     |
| Altay      | R1a1a*     | 16    | 12     | 14      | 18      | 26     | 11     | 11     | 13     | 11     | 10     |
| Altay      | R1a1a*     | 16    | 12     | 14      | 17      | 26     | 11     | 11     | 13     | 11     | 10     |
| Altay      | R1a1a*     | 17    | 12     | 13      | 18      | 24     | 11     | 11     | 14     | 10     | 10     |
| Altay      | R1a1a*     | 16    | 12     | 14      | 18      | 26     | 11     | 11     | 13     | 11     | 10     |
| Austria    | R1a1a*     | 16    | 12     | 14      | 17      | 25     | 11     | 11     | 13     | 10     | 10     |
| Austria    | R1a1a*     | 16    | 12     | 14      | 17      | 25     | 10     | 11     | 13     | 10     | 10     |
| Austria    | R1a1a*     | 16    | 12     | 13      | 16      | 25     | 10     | 11     | 13     | 10     | 10     |
| Austria    | R1a1a*     | 16    | 12     | 13      | 17      | 25     | 10     | 11     | 13     | 10     | 10     |
| Belarus    | R1a1a*     | 16    | 12     | 13      | 17      | 25     | 11     | 11     | 13     | 11     | 10     |
| Belarus    | R1a1a*     | 15    | 12     | 13      | 17      | 26     | 11     | 11     | 13     | 10     | 10     |
| Cambodia   | R1a1a*     | 14    | 12     | 14      | 17      | 22     | 11     | 11     | 14     | 12     | 10     |
| Caucasus   | R1a1a*     | 16    | 12     | 14      | 17      | 25     | 11     | 11     | 13     | 11     | 11     |
| Caucasus   | R1a1a*     | 15    | 12     | 13      | 17      | 24     | 11     | 11     | 13     | 10     | 10     |
| Caucasus   | R1a1a*     | 15    | 12     | 12      | 17      | 25     | 11     | 11     | 13     | 10     | 10     |
| Caucasus   | R1a1a*     | 16    | 12     | 13      | 18      | 25     | 11     | 11     | 13     | 10     | 10     |
| Caucasus   | R1a1a*     | 15    | 12     | 13      | 19      | 25     | 10     | 11     | 14     | 10     | 10     |
| Caucasus   | R1a1a*     | 16    | 12     | 12      | 17      | 24     | 11     | 11     | 13     | 11     | 10     |
| Caucasus   | R1a1a*     | 15    | 12     | 12      | 17      | 25     | 11     | 11     | 13     | 10     | 10     |
| Caucasus   | R1a1a*     | 15    | 12     | 13      | 17      | 25     | 10     | 11     | 13     | 10     | 10     |
| Caucasus   | R1a1a*     | 16    | 12     | 13      | 18      | 25     | 12     | 11     | 13     | 10     | 10     |
| Caucasus   | R1a1a*     | 15    | 12     | 13      | 16      | 26     | 10     | 11     | 13     | 12     | 10     |
| Caucasus   | R1a1a*     | 16    | 12     | 14      | 17      | 25     | 10     | 11     | 13     | 12     | 10     |

|                |        |    |    |    |    |    |    |    |    |    |    |
|----------------|--------|----|----|----|----|----|----|----|----|----|----|
| Central Asia   | R1a1a* | 17 | 12 | 13 | 17 | 24 | 11 | 12 | 13 | 10 | 10 |
| Central Asia   | R1a1a* | 15 | 12 | 13 | 18 | 24 | 10 | 11 | 13 | 10 | 10 |
| Central Asia   | R1a1a* | 16 | 12 | 14 | 18 | 25 | 10 | 11 | 13 | 12 | 10 |
| Crete          | R1a1a* | 15 | 12 | 14 | 16 | 25 | 11 | 11 | 14 | 10 | 10 |
| Crete          | R1a1a* | 16 | 12 | 13 | 17 | 25 | 11 | 11 | 13 | 12 | 10 |
| Crete          | R1a1a* | 15 | 12 | 13 | 18 | 25 | 11 | 11 | 13 | 10 | 10 |
| Crete          | R1a1a* | 16 | 12 | 13 | 17 | 24 | 11 | 11 | 13 | 12 | 10 |
| Crete          | R1a1a* | 16 | 12 | 14 | 18 | 25 | 11 | 11 | 13 | 10 | 10 |
| Crete          | R1a1a* | 15 | 12 | 13 | 16 | 24 | 10 | 11 | 13 | 10 | 10 |
| Crete          | R1a1a* | 16 | 12 | 14 | 16 | 24 | 10 | 11 | 13 | 10 | 10 |
| Crete          | R1a1a* | 15 | 13 | 13 | 17 | 23 | 11 | 11 | 13 | 10 | 10 |
| Crete          | R1a1a* | 15 | 12 | 13 | 17 | 24 | 11 | 11 | 13 | 10 | 10 |
| Crete          | R1a1a* | 16 |    | 14 | 16 | 25 | 10 | 11 | 13 | 10 | 10 |
| Crete          | R1a1a* | 16 | 12 | 13 | 17 | 24 | 11 | 11 |    | 10 | 10 |
| Crete          | R1a1a* | 16 | 12 | 13 | 17 | 25 | 11 | 11 | 13 | 10 |    |
| Czech Republic | R1a1a* | 15 | 12 | 14 | 17 | 25 | 11 | 11 | 13 | 10 | 10 |
| Czech Republic | R1a1a* | 16 | 12 | 14 | 17 | 25 | 11 | 11 | 13 | 10 | 10 |
| Czech Republic | R1a1a* | 15 | 12 | 12 | 17 | 24 | 11 | 11 | 13 | 10 | 9  |
| Denmark        | R1a1a* | 16 | 12 | 13 | 17 | 26 | 10 | 11 | 13 | 10 | 11 |
| Denmark        | R1a1a* | 15 | 12 | 13 | 16 | 26 | 11 | 11 | 13 | 11 | 10 |
| Denmark        | R1a1a* | 15 | 12 | 14 | 17 | 24 | 11 | 11 | 13 | 10 | 10 |
| Denmark        | R1a1a* | 16 | 12 | 13 | 17 | 25 | 11 | 11 | 13 | 10 | 11 |
| Denmark        | R1a1a* | 15 | 12 | 13 | 16 | 24 | 10 | 11 | 13 | 10 | 10 |
| Denmark        | R1a1a* | 15 | 12 | 13 | 17 | 24 | 11 | 11 | 13 | 10 | 10 |
| Denmark        | R1a1a* | 15 | 12 | 13 | 17 | 25 | 10 | 11 | 13 | 10 | 10 |
| Denmark        | R1a1a* | 17 | 12 | 13 | 17 | 25 | 11 | 11 | 13 | 11 | 11 |
| Denmark        | R1a1a* | 15 | 12 | 14 | 17 | 24 | 11 | 11 | 13 | 10 | 10 |
| Denmark        | R1a1a* | 16 | 12 | 13 | 17 | 25 | 11 | 11 | 13 | 10 | 11 |
| Denmark        | R1a1a* | 15 | 12 | 13 | 17 | 24 | 10 | 11 | 13 | 10 | 10 |
| Denmark        | R1a1a* | 15 | 12 | 14 | 17 | 26 | 10 | 11 | 13 | 10 | 11 |
| Egypt          | R1a1a* | 16 | 12 | 13 | 18 | 25 | 10 | 11 | 13 | 10 | 10 |
| Egypt          | R1a1a* | 15 | 12 | 13 | 16 | 24 | 11 | 13 | 13 | 12 | 11 |
| Egypt          | R1a1a* | 15 | 12 | 14 | 17 | 25 | 11 | 11 | 12 | 10 | 10 |
| Egypt          | R1a1a* | 15 | 12 | 14 | 17 | 24 | 11 | 13 | 13 | 12 | 11 |

|         |        |    |    |    |    |    |    |    |    |    |    |
|---------|--------|----|----|----|----|----|----|----|----|----|----|
| England | R1a1a* | 15 | 12 | 14 | 17 | 25 | 10 | 11 | 13 | 10 | 10 |
| Estonia | R1a1a* | 15 | 12 | 13 | 17 | 25 | 10 | 11 | 13 | 10 | 10 |
| Estonia | R1a1a* | 16 | 12 | 13 | 17 | 24 | 10 | 11 | 13 | 10 | 10 |
| Estonia | R1a1a* | 16 | 12 | 13 | 18 | 25 | 10 | 11 | 13 | 11 | 10 |
| Estonia | R1a1a* | 16 | 12 | 13 | 17 | 24 | 11 | 10 | 14 | 11 | 10 |
| Estonia | R1a1a* | 16 | 12 | 13 | 17 | 25 | 10 | 11 | 12 | 11 | 10 |
| Estonia | R1a1a* | 16 | 12 | 13 | 17 | 25 | 11 | 11 | 13 | 11 | 10 |
| Estonia | R1a1a* | 16 | 12 | 13 | 17 | 25 | 11 | 11 | 13 | 9  | 10 |
| Estonia | R1a1a* | 15 | 12 | 13 | 16 | 25 | 11 | 11 | 13 | 10 | 10 |
| Estonia | R1a1a* | 16 | 12 | 12 | 17 | 25 | 11 | 11 | 13 | 10 | 10 |
| Estonia | R1a1a* | 16 | 12 | 13 | 17 | 25 | 12 | 11 | 13 | 9  | 10 |
| Estonia | R1a1a* | 16 | 12 | 14 | 17 | 25 | 11 | 11 | 14 | 10 | 10 |
| Estonia | R1a1a* | 16 | 12 | 13 | 18 | 26 | 11 | 11 | 13 | 10 | 11 |
| Estonia | R1a1a* | 16 | 12 | 13 | 17 | 24 | 11 | 11 | 14 | 9  | 10 |
| Estonia | R1a1a* | 16 | 12 | 13 | 16 | 25 | 10 | 11 | 13 | 10 | 10 |
| Europe  | R1a1a* | 16 | 12 | 14 | 17 | 25 | 11 | 11 | 13 | 11 | 11 |
| France  | R1a1a* | 15 | 12 | 13 | 17 | 25 | 11 | 11 | 13 | 10 | 10 |
| Germany | R1a1a* | 15 | 12 | 13 | 17 |    | 11 |    |    | 11 | 10 |
| Germany | R1a1a* | 17 | 12 | 14 | 18 | 25 | 11 | 11 | 13 | 11 | 10 |
| Germany | R1a1a* | 16 | 12 | 12 | 17 | 25 | 11 | 11 | 13 | 12 | 10 |
| Germany | R1a1a* | 16 | 12 | 13 | 17 | 25 | 11 | 11 | 13 | 11 | 10 |
| Germany | R1a1a* | 15 | 12 | 13 | 17 | 25 | 10 | 11 | 13 | 10 | 10 |
| Germany | R1a1a* | 17 | 12 | 13 | 17 | 25 | 11 | 11 | 13 | 11 | 10 |
| Germany | R1a1a* | 17 | 12 | 13 | 17 | 24 | 10 | 11 | 13 | 11 | 10 |
| Germany | R1a1a* | 15 | 12 | 13 | 17 | 24 | 10 | 11 | 13 | 10 | 10 |
| Germany | R1a1a* | 16 | 12 | 13 | 17 | 25 | 10 | 11 | 14 | 10 | 10 |
| Germany | R1a1a* | 16 | 12 | 13 | 17 | 25 | 11 | 11 | 13 | 11 | 10 |
| Germany | R1a1a* | 15 | 12 | 14 | 17 | 25 | 11 | 11 | 13 | 11 | 10 |
| Germany | R1a1a* | 16 | 12 | 13 | 17 | 25 | 10 | 11 | 13 | 10 | 10 |
| Germany | R1a1a* | 16 | 12 | 12 | 18 | 25 | 10 | 11 | 13 | 10 | 10 |
| Germany | R1a1a* | 18 | 12 | 13 | 18 | 25 | 11 | 11 | 13 | 10 | 10 |
| Germany | R1a1a* | 15 | 10 | 13 | 17 | 25 | 10 | 11 | 13 | 10 | 10 |
| Germany | R1a1a* | 16 | 12 | 13 | 17 | 25 | 10 | 11 | 13 | 11 | 10 |
| Germany | R1a1a* | 17 | 12 | 13 | 17 | 25 | 11 | 11 | 13 | 11 | 11 |

|           |        |    |    |    |    |    |    |    |    |    |    |
|-----------|--------|----|----|----|----|----|----|----|----|----|----|
| Germany   | R1a1a* | 16 | 12 | 13 | 17 | 24 | 10 | 11 | 13 | 11 | 10 |
| Germany   | R1a1a* | 17 | 12 | 13 | 18 | 25 | 11 | 11 | 13 | 10 | 10 |
| Germany   | R1a1a* | 15 | 12 | 13 | 18 | 25 | 11 | 11 | 14 | 10 | 10 |
| Germany   | R1a1a* | 17 | 12 | 14 | 17 | 25 | 11 | 11 | 13 | 11 | 10 |
| Germany   | R1a1a* | 15 | 12 | 13 | 17 | 25 | 11 | 11 | 13 | 10 | 10 |
| Germany   | R1a1a* | 15 | 13 | 13 | 18 | 24 | 11 | 11 | 13 | 10 | 10 |
| Germany   | R1a1a* | 17 | 12 | 13 | 17 | 25 | 10 | 11 | 13 | 10 | 10 |
| Germany   | R1a1a* | 15 | 12 | 13 | 17 | 25 | 10 | 11 | 13 | 10 | 10 |
| Germany   | R1a1a* | 16 | 12 | 13 | 15 | 25 | 11 | 11 | 13 | 10 | 10 |
| Germany   | R1a1a* | 17 | 12 | 13 | 17 | 25 | 11 | 11 | 13 | 11 | 10 |
| Germany   | R1a1a* | 16 | 12 | 13 | 17 | 25 | 11 | 11 | 13 | 10 | 11 |
| Greece    | R1a1a* | 16 | 12 | 13 | 17 | 26 | 11 | 11 | 13 | 10 | 10 |
| Greece    | R1a1a* | 16 | 12 | 13 | 17 | 24 | 11 | 11 | 13 | 10 | 10 |
| Greece    | R1a1a* | 15 | 12 | 12 | 17 | 25 | 11 | 11 | 13 | 10 | 10 |
| Greece    | R1a1a* | 16 | 12 | 13 | 17 | 24 | 11 | 11 | 13 | 10 | 10 |
| Greece    | R1a1a* | 15 | 12 | 13 | 17 | 24 | 10 | 11 | 13 | 10 | 10 |
| Greece    | R1a1a* | 17 | 12 | 14 | 19 | 25 | 10 | 11 | 13 | 10 | 10 |
| Greece    | R1a1a* | 16 | 12 | 13 | 17 | 24 | 11 | 11 | 13 | 10 | 10 |
| Greece    | R1a1a* | 16 | 12 | 13 | 17 | 24 | 11 | 11 | 13 | 10 | 10 |
| Greece    | R1a1a* | 16 | 12 | 14 | 17 | 25 | 11 | 11 | 13 | 10 | 10 |
| Greece    | R1a1a* | 16 | 12 | 13 | 18 | 26 | 11 | 11 | 13 | 10 | 10 |
| Greece    | R1a1a* | 15 | 12 | 12 | 17 | 24 | 11 | 11 | 13 | 10 | 10 |
| Greece    | R1a1a* | 16 | 12 | 13 | 17 | 25 | 11 | 11 | 13 | 11 | 10 |
| Greece    | R1a1a* | 17 | 12 | 13 | 17 | 25 | 10 | 11 | 13 | 11 | 11 |
| Hungarian | R1a1a* | 15 | 12 | 13 | 17 | 25 | 10 | 11 | 13 | 9  | 10 |
| Hungarian | R1a1a* | 15 | 12 | 13 | 16 | 25 | 10 | 11 | 13 | 11 | 10 |
| Hungarian | R1a1a* | 15 | 12 | 13 | 17 | 25 | 10 | 11 | 13 | 10 | 10 |
| Hungarian | R1a1a* | 15 | 12 | 13 | 18 | 25 | 10 | 11 | 13 | 10 | 10 |
| Hungarian | R1a1a* | 15 | 12 | 13 | 17 | 25 | 11 | 11 | 13 | 12 | 11 |
| Hungarian | R1a1a* | 15 | 12 | 13 | 17 | 25 | 11 | 11 | 13 | 11 | 10 |
| Hungarian | R1a1a* | 16 | 12 | 13 | 16 | 24 | 10 | 11 | 13 | 10 | 10 |
| Hungarian | R1a1a* | 16 | 12 | 13 | 17 | 25 | 10 | 11 | 13 | 10 | 10 |
| Hungarian | R1a1a* | 16 | 13 | 13 | 18 | 25 | 10 | 11 | 13 | 10 | 10 |
| Hungarian | R1a1a* | 16 | 12 | 12 | 18 | 25 | 11 | 11 | 13 | 10 | 10 |

|           |        |    |    |    |    |    |    |    |    |    |    |
|-----------|--------|----|----|----|----|----|----|----|----|----|----|
| Hungarian | R1a1a* | 16 | 12 | 13 | 17 | 25 | 11 | 11 | 13 | 10 | 10 |
| Hungarian | R1a1a* | 16 | 13 | 14 | 17 | 25 | 11 | 11 | 13 | 11 | 10 |
| Hungarian | R1a1a* | 16 | 12 | 14 | 17 | 26 | 11 | 11 | 13 | 10 | 10 |
| Hungarian | R1a1a* | 17 | 12 | 14 | 17 | 25 | 11 | 11 | 13 | 10 | 10 |
| Hungarian | R1a1a* | 17 | 12 | 13 | 16 | 25 | 11 | 11 | 13 | 10 | 10 |
| India     | R1a1a* | 16 | 12 | 14 | 18 | 25 | 12 | 11 | 13 | 10 | 10 |
| India     | R1a1a* | 16 | 12 | 13 | 17 | 25 | 12 | 11 | 13 | 10 | 10 |
| India     | R1a1a* | 16 | 12 | 13 | 19 | 24 | 11 | 11 | 13 | 10 | 10 |
| India     | R1a1a* | 16 | 12 | 13 | 17 | 24 | 11 | 11 | 13 | 10 | 10 |
| India     | R1a1a* | 15 | 12 | 13 | 18 | 25 | 10 | 11 | 14 | 10 | 10 |
| India     | R1a1a* | 16 | 12 | 13 | 17 | 24 | 10 | 11 | 14 | 10 | 10 |
| India     | R1a1a* | 17 | 12 | 13 | 17 | 24 | 11 | 13 | 13 | 11 | 12 |
| India     | R1a1a* | 15 | 12 | 13 | 18 | 25 | 11 | 11 | 13 | 10 | 10 |
| India     | R1a1a* | 15 | 12 | 13 | 18 | 25 | 11 | 11 | 13 | 10 | 10 |
| India     | R1a1a* | 15 | 12 | 13 | 18 | 25 |    | 11 | 13 | 10 | 10 |
| India     | R1a1a* | 15 | 12 | 13 | 18 | 24 | 11 | 11 | 13 | 10 | 10 |
| India     | R1a1a* | 15 | 12 | 14 | 16 | 26 | 10 | 11 | 13 | 10 | 10 |
| India     | R1a1a* | 15 | 13 | 14 | 18 | 25 | 10 | 11 | 13 | 10 | 10 |
| India     | R1a1a* | 15 | 13 | 14 | 18 | 25 | 10 | 11 | 13 | 10 | 10 |
| India     | R1a1a* | 15 | 13 | 14 | 17 | 25 | 10 | 11 | 13 | 10 | 10 |
| India     | R1a1a* | 15 | 12 | 12 | 16 | 25 | 10 | 11 | 12 | 11 | 10 |
| India     | R1a1a* | 15 | 12 | 13 | 18 | 24 | 11 | 11 | 13 | 10 | 10 |
| India     | R1a1a* | 16 | 12 | 13 | 18 | 25 | 11 | 11 | 13 | 10 | 10 |
| India     | R1a1a* | 14 | 12 | 13 | 18 | 24 | 11 | 11 | 13 | 10 | 10 |
| India     | R1a1a* | 15 | 12 | 13 | 18 | 25 | 11 | 11 | 13 | 10 | 10 |
| India     | R1a1a* | 16 | 12 | 13 | 18 | 24 | 11 | 11 | 13 | 10 | 10 |
| India     | R1a1a* | 15 | 12 | 14 | 17 | 25 | 10 | 11 | 13 | 10 | 10 |
| India     | R1a1a* | 15 | 12 | 14 | 17 | 24 | 11 | 11 | 13 | 10 | 10 |
| India     | R1a1a* | 15 | 12 | 14 | 18 | 24 | 10 | 11 | 13 | 10 | 10 |
| India     | R1a1a* | 16 | 12 | 13 | 18 | 25 | 11 | 11 | 13 | 10 | 10 |
| India     | R1a1a* | 15 | 12 | 13 | 17 | 25 | 11 | 11 | 13 | 10 | 10 |
| India     | R1a1a* | 17 | 12 | 13 | 17 | 25 | 10 | 11 | 13 | 10 | 10 |
| India     | R1a1a* | 15 | 12 | 13 | 17 | 25 | 11 | 11 | 13 | 10 | 10 |
| India     | R1a1a* | 16 | 12 | 14 | 18 | 25 | 12 | 11 | 13 | 10 | 10 |



|       |        |    |    |    |    |    |    |    |    |    |    |
|-------|--------|----|----|----|----|----|----|----|----|----|----|
| India | R1a1a* | 15 | 12 | 13 | 15 | 25 | 10 | 11 | 13 | 10 | 10 |
| India | R1a1a* | 16 | 13 | 13 | 19 | 24 | 11 | 11 | 13 | 10 | 10 |
| India | R1a1a* | 16 | 12 | 14 | 17 | 25 | 11 | 11 | 13 | 10 | 10 |
| India | R1a1a* | 17 | 12 | 13 | 18 | 25 | 11 | 11 | 13 | 10 | 10 |
| India | R1a1a* | 17 | 13 | 13 | 18 | 26 | 11 | 11 | 13 | 10 | 10 |
| India | R1a1a* | 16 | 12 | 13 | 18 | 24 | 10 | 12 | 13 | 10 | 10 |
| India | R1a1a* | 15 | 12 | 13 | 18 | 25 | 10 | 11 | 13 | 10 | 10 |
| India | R1a1a* | 15 | 12 | 13 | 18 | 25 | 10 | 11 | 12 | 10 | 10 |
| India | R1a1a* | 15 | 12 | 13 | 20 | 25 | 10 | 11 | 15 | 10 | 12 |
| India | R1a1a* | 16 | 12 | 14 | 17 | 25 | 10 | 11 | 14 | 10 | 10 |
| India | R1a1a* | 16 | 12 | 13 | 18 | 24 | 10 | 11 | 13 | 10 | 10 |
| India | R1a1a* | 15 | 12 | 13 | 18 | 24 | 11 | 11 | 13 | 10 | 10 |
| India | R1a1a* | 16 | 12 | 13 | 18 | 25 | 10 | 11 | 13 | 10 | 10 |
| India | R1a1a* | 16 | 13 | 13 | 17 | 24 | 11 | 11 | 13 | 10 | 10 |
| India | R1a1a* | 17 | 12 | 13 | 17 | 23 | 11 | 11 | 13 | 10 | 11 |
| India | R1a1a* | 15 | 12 | 14 | 17 | 25 | 10 | 11 | 13 | 11 | 10 |
| India | R1a1a* | 16 | 12 | 14 | 17 | 25 | 12 | 11 | 13 | 10 | 10 |
| India | R1a1a* | 15 | 12 | 14 | 18 | 25 | 10 | 11 | 13 | 10 | 10 |
| India | R1a1a* | 15 | 12 |    |    | 22 | 10 | 10 | 13 | 10 | 12 |
| India | R1a1a* | 16 | 12 | 14 | 17 | 24 | 11 | 11 | 13 | 10 | 10 |
| India | R1a1a* | 16 | 12 | 14 | 17 | 25 | 12 | 11 | 13 | 10 | 10 |
| India | R1a1a* | 15 | 12 | 13 | 18 | 25 | 11 | 11 | 13 | 10 | 10 |
| India | R1a1a* | 15 | 12 | 14 | 18 | 25 | 10 | 11 | 13 | 10 | 10 |
| India | R1a1a* | 16 | 12 | 14 | 17 | 25 | 11 | 11 | 13 | 11 | 10 |
| India | R1a1a* | 16 | 12 | 14 | 17 | 25 | 11 | 11 | 13 | 10 | 10 |
| India | R1a1a* | 16 | 12 | 14 | 18 | 25 | 10 | 11 | 14 | 10 | 10 |
| India | R1a1a* | 16 | 12 | 14 | 17 | 25 | 11 | 11 | 13 | 10 | 10 |
| India | R1a1a* | 15 | 12 | 13 | 18 | 25 | 11 | 11 | 13 | 10 | 10 |
| India | R1a1a* | 17 | 12 | 13 | 18 | 25 | 11 | 11 | 13 | 11 | 10 |
| India | R1a1a* | 15 | 12 | 13 | 17 | 24 | 10 | 11 | 13 | 10 | 10 |
| India | R1a1a* | 15 | 12 | 13 | 17 | 24 | 10 | 11 | 13 | 10 | 10 |
| India | R1a1a* | 15 | 12 | 14 | 17 | 24 | 10 | 12 | 13 | 10 | 10 |
| India | R1a1a* | 15 | 12 | 14 | 18 | 24 | 10 | 11 | 13 | 10 | 10 |
| India | R1a1a* | 16 | 13 | 13 | 19 | 25 | 11 | 11 | 14 | 10 | 10 |

|       |        |    |    |    |    |    |    |    |    |    |    |
|-------|--------|----|----|----|----|----|----|----|----|----|----|
| India | R1a1a* | 15 | 12 | 14 | 19 | 25 | 10 | 11 | 13 | 10 | 10 |
| India | R1a1a* | 15 | 12 | 14 | 17 | 25 | 11 | 11 | 13 | 11 | 10 |
| India | R1a1a* | 16 | 12 | 13 | 17 | 25 | 10 | 11 | 13 | 10 | 10 |
| India | R1a1a* | 15 | 12 | 14 | 17 | 25 | 10 | 11 | 13 | 10 | 10 |
| India | R1a1a* | 15 | 12 | 13 | 19 | 25 | 10 | 11 | 13 | 10 | 11 |
| India | R1a1a* | 16 | 13 | 13 | 18 | 25 | 11 | 11 | 13 | 10 | 10 |
| India | R1a1a* | 16 | 12 | 13 | 17 | 25 | 10 | 11 | 13 | 10 | 10 |
| India | R1a1a* | 15 | 12 | 15 | 17 | 25 | 10 | 11 | 13 | 10 | 10 |
| India | R1a1a* | 15 | 12 | 14 | 18 | 24 | 10 | 11 | 13 | 10 | 10 |
| India | R1a1a* | 16 | 12 | 13 | 17 | 24 | 11 | 11 | 13 | 10 | 11 |
| India | R1a1a* | 15 | 12 | 14 | 18 | 24 | 10 | 11 | 13 | 10 | 10 |
| India | R1a1a* | 17 | 12 | 14 | 17 | 27 | 10 | 11 | 13 | 11 | 10 |
| India | R1a1a* | 15 | 12 | 14 | 18 | 24 | 10 | 11 | 12 | 10 | 10 |
| India | R1a1a* | 16 | 12 | 13 | 17 | 25 | 11 | 11 | 14 | 10 | 10 |
| India | R1a1a* | 15 | 12 | 13 | 17 | 24 | 10 | 11 | 13 | 10 | 10 |
| India | R1a1a* | 16 | 12 | 14 | 17 | 25 | 10 | 11 | 13 | 10 | 10 |
| India | R1a1a* | 15 | 12 | 13 | 19 | 23 | 11 | 11 | 14 | 10 | 10 |
| India | R1a1a* | 15 | 12 | 14 | 17 | 25 | 10 | 11 | 13 | 10 | 10 |
| India | R1a1a* | 16 | 12 | 13 | 17 | 25 | 10 | 11 | 13 | 10 | 10 |
| India | R1a1a* | 16 | 12 | 12 | 18 | 25 | 11 | 11 | 13 | 10 | 10 |
| India | R1a1a* | 17 | 12 | 14 | 16 | 25 | 10 | 11 | 13 | 10 | 10 |
| India | R1a1a* | 15 | 12 | 14 | 17 | 25 | 10 | 11 | 13 | 11 | 10 |
| India | R1a1a* | 15 | 12 | 13 | 18 | 25 | 11 | 11 | 13 | 10 | 9  |
| India | R1a1a* | 15 | 12 | 13 | 18 | 26 |    | 11 | 13 | 10 | 10 |
| India | R1a1a* | 15 | 12 | 14 | 17 | 24 | 10 | 11 | 14 | 10 | 10 |
| India | R1a1a* | 16 | 12 | 13 | 18 | 25 | 11 | 11 | 13 | 10 | 10 |
| India | R1a1a* | 17 | 12 | 13 | 17 | 25 | 10 | 11 | 13 | 10 | 10 |
| India | R1a1a* | 15 | 12 | 13 | 17 | 25 | 11 | 11 | 13 | 10 | 10 |
| India | R1a1a* | 16 | 12 | 13 | 16 | 25 | 11 | 11 | 13 | 10 | 11 |
| India | R1a1a* | 15 | 12 | 13 | 18 | 25 | 10 | 11 | 13 | 10 | 10 |
| India | R1a1a* | 15 | 12 | 14 | 17 | 24 |    | 11 | 13 | 12 | 10 |
| India | R1a1a* | 15 | 12 | 13 | 17 | 25 | 10 | 11 | 13 | 11 | 10 |
| India | R1a1a* | 15 | 12 | 13 | 16 | 24 | 11 | 11 | 13 | 10 | 10 |
| India | R1a1a* | 15 | 13 | 14 | 17 | 24 | 10 | 11 | 12 | 11 | 10 |

|       |        |    |    |    |    |    |    |    |    |    |    |
|-------|--------|----|----|----|----|----|----|----|----|----|----|
| India | R1a1a* | 15 | 13 | 14 | 17 | 24 | 10 | 11 | 12 | 11 | 10 |
| India | R1a1a* | 15 | 13 | 14 | 18 | 24 | 10 | 11 | 12 | 11 | 10 |
| India | R1a1a* | 15 | 13 | 14 | 17 | 24 | 10 | 11 | 12 | 11 | 10 |
| India | R1a1a* | 15 | 12 | 15 | 18 | 25 | 10 | 11 | 13 | 10 | 10 |
| India | R1a1a* | 15 | 13 | 12 | 17 | 23 | 10 | 10 | 13 | 10 | 11 |
| India | R1a1a* | 17 | 12 | 13 | 18 | 24 | 10 | 11 | 13 | 10 | 10 |
| India | R1a1a* | 16 | 12 | 13 | 18 | 24 | 11 | 11 | 13 | 10 | 10 |
| India | R1a1a* | 15 | 12 | 14 | 18 | 25 | 10 | 11 | 13 | 10 | 10 |
| India | R1a1a* | 15 | 12 | 14 | 18 | 25 | 10 | 11 | 13 | 10 | 10 |
| India | R1a1a* | 16 | 12 | 13 | 17 | 24 | 10 | 11 | 13 | 10 | 10 |
| India | R1a1a* | 15 | 12 | 14 | 18 | 25 | 10 | 11 | 13 | 10 | 10 |
| India | R1a1a* | 15 | 12 | 13 | 16 | 25 | 10 | 11 | 13 | 10 | 10 |
| India | R1a1a* | 16 | 12 | 13 | 18 | 24 | 11 | 11 | 13 | 10 | 10 |
| India | R1a1a* | 15 | 12 | 14 | 18 | 25 | 10 | 11 | 13 | 10 | 11 |
| India | R1a1a* | 15 | 12 | 14 | 18 | 25 | 10 | 11 | 13 | 10 | 11 |
| India | R1a1a* | 16 | 12 | 13 | 17 | 25 | 11 | 11 | 13 | 10 | 10 |
| India | R1a1a* | 15 | 12 | 12 | 18 | 24 | 10 | 11 | 13 | 10 | 10 |
| India | R1a1a* | 16 | 12 | 13 | 16 | 25 | 10 | 11 | 13 | 10 | 10 |
| India | R1a1a* | 15 | 12 | 13 | 16 | 22 | 10 | 11 | 11 | 11 | 11 |
| India | R1a1a* | 15 | 12 | 13 | 16 | 24 | 10 | 11 | 14 | 11 | 10 |
| Iran  | R1a1a* | 16 |    | 13 | 16 | 25 | 10 | 11 | 13 | 10 | 10 |
| Iran  | R1a1a* | 15 | 12 | 13 | 18 | 24 | 11 | 11 | 13 | 10 | 10 |
| Iran  | R1a1a* | 15 | 11 | 14 | 17 | 26 | 11 | 11 | 13 | 10 | 10 |
| Iran  | R1a1a* | 16 | 12 | 13 | 18 | 24 | 11 | 11 | 13 | 11 | 10 |
| Iran  | R1a1a* | 15 | 12 | 14 | 17 | 26 | 11 | 11 | 13 | 10 | 10 |
| Iran  | R1a1a* | 17 | 12 | 13 | 17 | 24 | 10 | 11 | 13 | 10 | 10 |
| Iran  | R1a1a* | 16 | 12 | 13 | 17 | 25 | 11 | 11 | 13 | 10 | 10 |
| Iran  | R1a1a* | 17 | 12 | 13 | 18 | 25 | 11 | 11 | 13 | 10 | 10 |
| Iran  | R1a1a* | 16 | 13 | 13 | 17 | 25 | 10 | 11 | 13 | 10 | 11 |
| Iran  | R1a1a* | 17 | 12 | 13 | 16 | 24 | 10 | 11 | 13 | 10 | 10 |
| Iran  | R1a1a* | 16 | 12 | 13 | 16 | 26 | 11 | 11 | 13 | 10 | 10 |
| Iran  | R1a1a* | 15 | 12 | 14 | 18 | 25 | 10 | 11 | 13 | 10 | 10 |
| Iran  | R1a1a* | 15 | 12 | 12 | 17 | 25 | 11 | 11 | 13 | 10 | 10 |
| Iran  | R1a1a* | 15 | 12 | 13 | 16 | 26 | 12 | 11 | 14 | 10 | 11 |

|            |        |    |    |    |    |    |    |    |    |    |    |
|------------|--------|----|----|----|----|----|----|----|----|----|----|
| Iran       | R1a1a* | 16 | 12 | 12 | 18 | 25 | 10 | 11 | 13 | 10 | 10 |
| Iran       | R1a1a* | 15 | 12 | 13 | 18 | 24 | 11 | 11 | 13 | 10 | 9  |
| Iran       | R1a1a* | 16 | 12 | 13 | 16 | 26 | 11 | 11 | 13 | 10 | 10 |
| Iran       | R1a1a* | 16 | 12 | 13 | 16 | 25 | 11 | 11 | 13 | 10 | 10 |
| Iran       | R1a1a* | 15 | 12 | 13 | 17 | 25 | 11 | 11 | 13 | 10 | 10 |
| Iran       | R1a1a* | 16 | 12 | 13 | 16 | 25 | 11 | 11 | 13 | 10 | 10 |
| Iran       | R1a1a* | 15 | 12 | 13 | 18 | 25 | 10 | 11 | 13 | 10 | 10 |
| Iran       | R1a1a* | 16 | 12 | 13 | 17 | 23 | 11 | 11 | 13 | 10 | 10 |
| Iran       | R1a1a* | 16 | 12 | 14 | 18 | 24 | 11 | 11 | 13 | 10 | 10 |
| Iran       | R1a1a* | 16 | 12 | 13 | 17 | 25 | 11 | 11 | 13 | 10 | 10 |
| Iran       | R1a1a* | 16 | 12 | 13 | 16 | 25 | 11 | 11 | 13 | 10 | 10 |
| Iraq       | R1a1a* | 14 | 12 | 13 | 16 | 24 | 10 | 11 | 12 | 11 | 10 |
| Ireland    | R1a1a* | 15 | 12 | 13 | 17 | 25 | 10 | 11 | 13 | 10 | 10 |
| Ireland    | R1a1a* | 15 | 10 | 14 | 17 | 25 | 10 | 11 | 13 | 10 | 10 |
| Ireland    | R1a1a* | 17 | 12 | 13 | 18 | 25 | 11 | 11 | 13 | 10 | 10 |
| Israel     | R1a1a* | 15 | 12 | 14 | 16 | 25 | 11 | 11 | 12 | 10 | 10 |
| Israel     | R1a1a* | 15 | 12 | 14 | 16 | 25 | 11 | 11 | 12 | 10 | 10 |
| Italy      | R1a1a* | 16 | 12 | 13 | 18 | 25 | 10 | 11 | 13 | 11 | 10 |
| Italy      | R1a1a* | 17 | 12 | 13 | 18 | 25 | 11 | 11 | 14 | 10 | 10 |
| Italy      | R1a1a* | 16 | 12 | 13 | 17 | 25 | 10 | 11 | 13 | 11 | 11 |
| Italy      | R1a1a* | 17 | 12 | 13 | 18 | 25 | 11 | 11 | 13 | 10 | 10 |
| Italy      | R1a1a* | 16 | 12 | 14 | 17 | 25 | 10 | 11 | 13 | 10 | 10 |
| Italy      | R1a1a* | 16 | 12 | 13 | 18 | 25 | 10 | 11 | 13 | 10 | 10 |
| Italy      | R1a1a* | 16 | 12 | 13 | 17 | 25 | 10 | 11 | 13 | 10 | 10 |
| Italy      | R1a1a* | 16 | 12 | 13 | 17 | 25 | 10 | 11 | 13 | 10 | 10 |
| Kyrgyzstan | R1a1a* |    | 12 | 14 | 17 | 25 | 11 | 11 | 13 | 10 | 10 |
| Kyrgyzstan | R1a1a* | 15 | 12 | 14 | 18 | 25 | 11 | 11 | 13 | 10 | 10 |
| Kyrgyzstan | R1a1a* | 16 | 12 | 14 | 18 | 24 | 11 | 11 | 13 | 10 | 10 |
| Kyrgyzstan | R1a1a* | 16 | 12 | 13 | 17 | 25 | 10 | 11 | 13 | 11 | 10 |
| Kyrgyzstan | R1a1a* | 15 | 12 | 13 | 18 | 25 | 11 | 11 | 13 | 10 | 10 |
| Kyrgyzstan | R1a1a* |    | 12 | 13 | 18 | 25 | 11 | 11 |    | 10 |    |
| Kyrgyzstan | R1a1a* | 16 | 12 | 14 | 19 | 24 | 11 | 11 | 13 | 10 | 10 |
| Kyrgyzstan | R1a1a* | 16 | 12 | 14 | 18 | 25 | 11 | 11 | 13 | 10 | 10 |
| Kyrgyzstan | R1a1a* | 16 | 12 | 14 | 18 | 25 | 10 | 11 | 13 | 10 | 10 |

|            |        |    |    |    |    |    |    |    |    |    |    |
|------------|--------|----|----|----|----|----|----|----|----|----|----|
| Kyrgyzstan | R1a1a* | 16 |    |    |    |    |    |    | 13 |    | 10 |
| Kyrgyzstan | R1a1a* | 15 | 12 | 13 | 18 | 24 | 11 | 11 | 13 | 10 | 10 |
| Kyrgyzstan | R1a1a* | 16 | 12 | 13 | 18 | 24 | 11 | 11 | 13 | 10 | 10 |
| Kyrgyzstan | R1a1a* | 16 | 12 | 13 | 18 | 26 | 11 | 11 | 13 | 10 | 10 |
| Kyrgyzstan | R1a1a* | 16 | 12 | 13 | 18 | 25 | 11 | 11 | 13 | 10 | 10 |
| Kyrgyzstan | R1a1a* | 16 | 12 | 14 | 18 | 25 | 11 | 11 | 13 | 10 | 10 |
| Kyrgyzstan | R1a1a* | 16 | 12 | 14 | 17 | 25 | 10 | 11 | 13 | 11 | 10 |
| Kyrgyzstan | R1a1a* | 16 | 12 | 13 | 18 | 25 | 11 | 11 | 13 | 10 | 10 |
| Kyrgyzstan | R1a1a* | 16 | 12 | 13 | 17 | 24 | 11 | 11 | 14 | 10 | 10 |
| Kyrgyzstan | R1a1a* | 16 | 12 | 14 | 18 | 25 | 11 | 11 | 13 | 10 | 9  |
| Kyrgyzstan | R1a1a* | 16 | 12 | 14 | 18 | 24 | 11 | 11 | 13 | 10 | 10 |
| Kyrgyzstan | R1a1a* | 16 | 12 | 14 | 17 | 25 | 11 | 11 | 13 | 10 | 10 |
| Kyrgyzstan | R1a1a* | 16 | 12 | 13 | 18 | 25 | 11 | 11 | 13 | 10 | 10 |
| Kyrgyzstan | R1a1a* | 15 | 12 | 14 | 17 | 25 | 11 | 11 | 13 | 10 | 10 |
| Kyrgyzstan | R1a1a* |    |    |    |    |    |    |    | 13 |    | 10 |
| Kyrgyzstan | R1a1a* |    | 12 | 14 | 17 | 25 | 11 | 11 | 13 | 11 | 10 |
| Kyrgyzstan | R1a1a* | 16 | 12 | 14 | 18 | 25 | 11 | 11 | 13 | 10 | 10 |
| Kyrgyzstan | R1a1a* | 17 | 12 | 13 | 17 | 25 | 11 | 11 | 13 | 10 | 10 |
| Kyrgyzstan | R1a1a* | 16 | 12 | 14 | 17 | 25 | 10 | 11 | 13 | 10 | 10 |
| Kyrgyzstan | R1a1a* | 16 | 12 | 14 | 17 | 25 | 11 | 11 | 14 | 10 | 10 |
| Kyrgyzstan | R1a1a* | 16 | 12 | 14 | 18 | 24 | 11 | 11 | 13 | 10 | 10 |
| Kyrgyzstan | R1a1a* | 16 |    |    |    |    |    |    | 13 |    |    |
| Kyrgyzstan | R1a1a* | 15 | 12 | 14 | 18 | 25 | 11 | 11 | 13 | 10 | 10 |
| Kyrgyzstan | R1a1a* | 16 |    |    |    |    |    |    | 13 |    | 10 |
| Kyrgyzstan | R1a1a* | 16 | 12 | 15 | 17 | 25 | 10 | 11 | 13 | 10 | 10 |
| Kyrgyzstan | R1a1a* | 16 |    |    |    |    |    |    | 13 |    | 10 |
| Kyrgyzstan | R1a1a* | 16 | 12 | 13 | 18 | 25 | 11 | 11 | 13 | 10 | 10 |
| Kyrgyzstan | R1a1a* | 16 | 12 | 13 | 16 | 25 | 11 | 11 | 13 | 10 | 10 |
| Kyrgyzstan | R1a1a* | 16 | 12 | 14 | 17 | 24 | 11 | 11 | 13 | 10 | 10 |
| Kyrgyzstan | R1a1a* | 17 | 12 | 13 | 18 | 25 | 11 | 11 | 13 | 10 | 10 |
| Kyrgyzstan | R1a1a* | 16 | 12 | 13 | 18 | 25 | 11 | 11 | 13 | 10 | 10 |
| Kyrgyzstan | R1a1a* | 16 | 12 | 13 | 18 | 24 | 11 | 11 | 13 | 10 | 10 |
| Kyrgyzstan | R1a1a* | 16 | 12 | 14 | 18 | 24 | 11 | 11 | 13 | 10 | 10 |
| Kyrgyzstan | R1a1a* | 16 |    |    |    |    |    |    | 13 |    | 10 |



|       |        |    |    |    |    |    |    |    |    |    |    |
|-------|--------|----|----|----|----|----|----|----|----|----|----|
| Nepal | R1a1a* | 15 | 12 | 13 | 18 | 25 | 10 | 11 | 13 | 11 | 10 |
| Nepal | R1a1a* | 16 |    | 13 | 17 | 24 | 10 | 11 | 13 |    | 10 |
| Nepal | R1a1a* | 16 | 12 | 12 | 17 | 25 | 11 | 11 | 13 | 10 | 10 |
| Nepal | R1a1a* | 15 | 13 | 14 | 18 | 25 | 10 | 11 | 13 | 10 | 10 |
| Nepal | R1a1a* | 16 | 13 | 13 | 18 | 25 | 12 | 11 | 13 | 10 | 10 |
| Nepal | R1a1a* | 16 | 12 | 13 | 18 | 25 | 11 | 11 | 13 | 10 | 10 |
| Nepal | R1a1a* | 16 | 12 | 13 | 18 | 25 | 11 | 11 | 13 | 11 | 10 |
| Nepal | R1a1a* | 16 | 12 | 12 | 17 | 25 | 11 | 11 | 13 | 10 | 10 |
| Nepal | R1a1a* | 16 | 12 | 13 | 17 | 25 | 11 | 11 | 13 | 10 | 10 |
| Nepal | R1a1a* | 16 | 12 | 13 | 17 | 25 | 10 | 11 | 13 | 11 | 11 |
| Nepal | R1a1a* | 16 | 12 | 13 | 18 | 25 | 11 | 11 | 13 | 10 | 10 |
| Nepal | R1a1a* | 16 | 12 | 13 | 18 | 24 | 12 | 11 | 14 | 11 | 10 |
| Nepal | R1a1a* | 15 | 12 | 13 | 17 | 24 | 11 | 11 | 13 | 10 | 10 |
| Nepal | R1a1a* | 16 |    | 13 | 18 | 25 | 11 | 11 | 13 |    | 11 |
| Nepal | R1a1a* | 15 | 12 | 13 | 18 | 25 | 10 | 11 | 13 | 10 | 10 |
| Nepal | R1a1a* | 15 | 12 | 14 | 18 | 25 | 10 | 11 | 13 | 10 |    |
| Nepal | R1a1a* | 17 | 12 | 14 | 17 | 24 | 11 | 11 | 13 | 10 | 10 |
| Nepal | R1a1a* | 16 | 12 | 13 | 17 | 25 | 11 | 13 | 13 | 10 | 10 |
| Nepal | R1a1a* | 16 | 12 | 13 | 17 | 25 | 10 | 11 | 13 | 10 | 10 |
| Nepal | R1a1a* | 15 | 12 | 12 | 18 | 24 | 11 | 11 | 13 | 10 | 10 |
| Nepal | R1a1a* | 16 | 12 | 12 | 16 | 25 | 11 | 11 | 13 | 10 | 10 |
| Nepal | R1a1a* | 15 | 12 | 14 | 16 | 25 | 10 | 12 | 13 | 9  | 10 |
| Nepal | R1a1a* | 16 | 12 | 13 | 17 | 24 | 11 | 11 | 13 | 10 | 10 |
| Nepal | R1a1a* | 16 | 12 | 14 | 18 | 25 | 10 | 11 | 13 | 12 | 10 |
| Nepal | R1a1a* | 16 | 12 | 14 | 18 | 25 | 9  | 11 | 13 | 12 | 10 |
| Nepal | R1a1a* | 16 | 12 | 14 | 18 | 25 | 9  | 11 | 13 | 12 |    |
| Nepal | R1a1a* | 16 | 12 | 14 | 18 | 25 | 10 | 11 | 13 | 10 |    |
| Nepal | R1a1a* | 16 | 12 | 14 | 18 | 25 | 10 | 11 | 13 | 10 | 10 |
| Nepal | R1a1a* | 16 | 12 | 14 | 18 | 25 | 10 | 11 | 13 | 10 | 10 |
| Nepal | R1a1a* | 16 | 12 | 14 | 18 | 25 | 10 | 11 | 13 | 10 | 10 |
| Nepal | R1a1a* | 16 | 12 | 13 | 16 | 25 | 11 | 11 | 13 | 12 | 10 |
| Nepal | R1a1a* | 16 | 12 | 14 | 18 | 25 | 9  | 11 | 13 | 12 | 10 |
| Nepal | R1a1a* | 15 | 12 | 13 | 15 | 25 | 11 | 11 | 13 | 10 | 10 |
| Nepal | R1a1a* | 17 | 12 | 14 | 19 | 24 | 10 | 11 | 13 | 11 | 10 |
| Nepal | R1a1a* | 15 | 12 | 13 | 18 | 25 | 11 | 11 | 13 | 11 | 10 |

|             |        |    |    |    |    |    |    |    |    |    |    |
|-------------|--------|----|----|----|----|----|----|----|----|----|----|
| Nepal       | R1a1a* | 16 | 12 | 14 | 18 | 25 | 9  | 11 | 13 | 12 | 10 |
| Nepal       | R1a1a* | 16 | 12 | 14 | 18 | 25 | 10 | 11 | 13 | 12 | 10 |
| Nepal       | R1a1a* | 15 | 12 | 13 | 18 | 25 | 11 | 11 | 13 | 11 | 10 |
| Nepal       | R1a1a* | 15 | 12 | 13 | 18 | 25 | 11 | 11 | 13 | 11 | 10 |
| Nepal       | R1a1a* | 16 |    | 13 | 18 | 25 | 11 | 11 | 13 |    | 10 |
| Netherlands | R1a1a* | 15 | 7  | 13 | 17 | 25 | 10 | 11 | 13 | 10 | 10 |
| Netherlands | R1a1a* | 16 | 10 | 13 | 18 | 25 | 10 | 11 | 13 | 10 | 10 |
| Oman        | R1a1a* | 16 | 12 | 14 | 16 | 24 | 11 | 11 | 13 | 10 | 10 |
| Oman        | R1a1a* | 16 | 12 | 13 | 18 | 23 | 12 | 11 | 13 | 10 | 10 |
| Oman        | R1a1a* | 16 | 12 | 13 | 16 | 25 | 11 | 11 | 13 | 10 | 10 |
| Oman        | R1a1a* | 16 | 12 | 13 | 17 | 25 | 11 | 11 | 13 | 10 | 11 |
| Oman        | R1a1a* | 16 | 12 | 12 | 16 | 25 | 10 | 11 | 14 | 11 | 9  |
| Oman        | R1a1a* | 15 | 12 | 13 | 17 | 25 | 11 | 11 | 12 | 11 | 10 |
| Oman        | R1a1a* | 16 | 12 | 12 | 16 | 25 | 10 | 11 | 14 | 11 | 9  |
| Oman        | R1a1a* | 16 | 12 | 13 | 18 | 24 | 11 | 11 | 13 | 10 | 10 |
| Oman        | R1a1a* | 15 | 12 | 13 | 18 | 25 | 11 | 11 | 13 | 10 | 10 |
| Oman        | R1a1a* | 16 | 12 | 13 | 18 | 24 | 11 | 11 | 13 | 10 | 10 |
| Orkney      | R1a1a* | 16 | 12 | 14 | 17 | 25 | 11 | 11 | 13 | 10 | 10 |
| Pakistan    | R1a1a* | 15 | 12 | 14 | 18 | 25 | 11 | 11 | 13 | 10 | 10 |
| Pakistan    | R1a1a* | 15 | 12 | 14 | 18 | 24 | 10 | 11 | 12 | 11 | 11 |
| Pakistan    | R1a1a* | 15 | 12 | 14 | 19 | 24 | 10 | 11 | 12 | 11 | 11 |
| Pakistan    | R1a1a* | 15 | 12 | 14 | 18 | 24 | 10 | 11 | 12 | 11 | 11 |
| Pakistan    | R1a1a* | 16 | 12 | 12 | 17 | 25 | 11 | 11 | 14 | 11 | 10 |
| Pakistan    | R1a1a* | 16 | 12 | 12 | 17 | 25 | 11 | 11 | 14 | 11 | 10 |
| Pakistan    | R1a1a* | 15 | 12 | 13 | 17 | 25 | 10 | 11 | 13 | 10 | 10 |
| Pakistan    | R1a1a* | 16 | 12 | 12 | 16 | 25 | 11 | 11 | 14 | 11 | 10 |
| Pakistan    | R1a1a* | 16 | 12 | 12 | 17 | 25 | 11 | 11 | 14 | 11 | 10 |
| Pakistan    | R1a1a* | 15 | 12 | 14 | 16 | 25 | 11 | 11 | 13 | 12 | 10 |
| Pakistan    | R1a1a* | 15 | 12 | 14 | 18 | 25 | 10 | 11 | 13 | 10 | 10 |
| Pakistan    | R1a1a* | 15 | 12 | 12 | 17 | 26 | 11 | 11 | 14 | 11 | 10 |
| Pakistan    | R1a1a* | 15 | 12 | 14 | 18 | 24 | 10 | 11 | 12 | 11 | 11 |
| Pakistan    | R1a1a* | 17 | 12 | 13 | 18 | 25 | 10 | 11 | 13 | 10 | 10 |
| Pakistan    | R1a1a* | 17 | 12 | 13 | 17 | 23 | 11 | 11 | 13 | 10 | 11 |



|          |        |    |    |    |    |    |    |    |    |    |    |
|----------|--------|----|----|----|----|----|----|----|----|----|----|
| Pakistan | R1a1a* | 17 | 12 | 12 | 17 | 25 | 11 | 11 | 14 | 11 | 10 |
| Pakistan | R1a1a* | 15 | 12 | 13 | 18 | 25 | 11 | 11 | 13 | 10 | 10 |
| Pakistan | R1a1a* | 17 | 12 | 13 | 18 | 25 | 10 | 11 | 13 | 10 | 10 |
| Pakistan | R1a1a* | 15 | 13 | 12 | 17 | 25 | 11 | 11 | 13 | 11 | 10 |
| Pakistan | R1a1a* | 17 | 12 | 13 | 18 | 25 | 11 | 11 | 13 | 10 | 10 |
| Pakistan | R1a1a* | 14 | 12 | 13 | 16 | 24 | 11 | 11 | 13 | 10 | 10 |
| Pakistan | R1a1a* | 17 | 12 | 12 | 17 | 25 | 11 | 11 | 14 | 11 | 10 |
| Pakistan | R1a1a* | 17 | 12 | 13 | 17 | 26 | 11 | 11 | 13 | 10 | 10 |
| Pakistan | R1a1a* | 15 | 12 | 14 | 18 | 25 | 10 | 11 | 13 | 10 | 10 |
| Pakistan | R1a1a* | 17 | 12 | 13 | 18 | 25 | 10 | 11 | 13 | 10 | 10 |
| Pakistan | R1a1a* | 17 | 12 | 14 | 18 | 25 | 10 | 12 | 13 | 10 | 11 |
| Pakistan | R1a1a* | 17 | 12 | 13 | 17 | 25 | 10 | 11 | 13 | 12 | 10 |
| Pakistan | R1a1a* | 17 | 12 | 13 | 17 | 24 | 12 | 11 | 13 | 10 | 10 |
| Pakistan | R1a1a* | 16 | 12 | 13 | 17 | 24 | 11 | 11 | 13 | 10 | 10 |
| Pakistan | R1a1a* | 17 | 12 | 13 | 17 | 24 | 11 | 11 | 13 | 10 | 10 |
| Pakistan | R1a1a* | 15 | 12 | 13 | 17 | 24 | 11 | 11 | 13 | 10 | 10 |
| Pakistan | R1a1a* | 17 | 12 | 13 | 18 | 24 | 10 | 11 | 13 | 10 | 10 |
| Pakistan | R1a1a* | 17 | 12 | 13 | 18 | 24 | 10 | 11 | 13 | 10 | 10 |
| Pakistan | R1a1a* | 17 | 12 | 13 | 17 | 24 | 12 | 11 | 13 | 10 | 10 |
| Pakistan | R1a1a* | 17 | 12 | 13 | 17 | 25 | 11 | 11 | 13 | 10 | 10 |
| Pakistan | R1a1a* | 17 | 12 | 13 | 16 | 24 | 11 | 11 | 13 | 10 | 10 |
| Pakistan | R1a1a* | 17 | 12 | 13 | 16 | 24 | 11 | 11 | 13 | 10 | 10 |
| Pakistan | R1a1a* | 16 | 12 | 13 | 16 | 24 | 11 | 11 | 13 | 10 | 10 |
| Pakistan | R1a1a* | 16 | 12 | 13 | 16 | 24 | 11 | 11 | 13 | 10 | 10 |
| Pakistan | R1a1a* | 16 | 12 | 13 | 16 | 25 | 10 | 12 | 13 | 10 | 10 |
| Pakistan | R1a1a* | 16 | 12 | 13 | 16 | 25 | 10 | 12 | 13 | 11 | 11 |
| Pakistan | R1a1a* | 15 | 12 | 14 | 18 | 24 | 10 | 11 | 12 | 11 | 11 |
| Pakistan | R1a1a* | 15 | 12 | 14 | 18 | 24 | 10 | 11 | 12 | 11 | 11 |
| Poland   | R1a1a* | 15 | 12 | 13 | 16 | 25 | 10 | 11 | 13 | 10 | 10 |
| Poland   | R1a1a* | 15 | 12 | 13 | 17 | 25 | 11 | 11 | 13 | 10 | 10 |
| Poland   | R1a1a* | 16 | 12 | 13 | 17 | 25 | 10 | 11 | 13 | 10 | 10 |
| Poland   | R1a1a* | 17 | 12 | 13 | 16 | 25 | 10 | 11 | 13 | 10 | 10 |
| Poland   | R1a1a* | 17 | 12 | 13 | 17 | 27 | 11 | 11 | 13 | 11 | 11 |
| Poland   | R1a1a* | 16 | 12 | 13 | 17 | 25 | 10 | 11 | 13 | 10 | 10 |

|          |        |    |    |    |    |    |    |    |    |    |    |
|----------|--------|----|----|----|----|----|----|----|----|----|----|
| Poland   | R1a1a* | 17 | 12 | 13 | 18 | 25 | 10 | 11 | 13 | 10 | 10 |
| Poland   | R1a1a* | 15 | 12 | 13 | 18 | 25 | 11 | 11 | 13 | 10 | 10 |
| Poland   | R1a1a* | 16 | 12 | 13 | 17 | 25 | 10 | 11 | 13 | 10 | 10 |
| Poland   | R1a1a* | 16 | 12 | 13 | 18 | 25 | 11 | 11 | 13 | 10 | 10 |
| Poland   | R1a1a* | 17 | 12 | 13 | 16 | 26 | 11 | 11 | 13 | 11 | 11 |
| Poland   | R1a1a* | 17 | 12 | 13 | 17 | 25 | 11 | 11 | 11 | 10 | 10 |
| Poland   | R1a1a* | 15 | 12 | 13 | 17 | 24 | 11 | 11 | 13 | 10 | 10 |
| Poland   | R1a1a* | 15 | 12 | 13 | 17 | 25 | 11 | 11 | 13 | 10 | 10 |
| Poland   | R1a1a* | 15 | 12 | 13 | 16 | 25 | 10 | 11 | 13 | 11 | 10 |
| Poland   | R1a1a* | 16 | 12 | 14 | 14 | 25 | 10 | 11 | 13 | 10 | 10 |
| Poland   | R1a1a* | 15 | 12 | 13 | 18 | 25 | 11 | 11 | 13 | 10 | 10 |
| Poland   | R1a1a* | 15 | 12 | 13 | 17 | 24 | 10 | 11 | 13 | 10 | 10 |
| Poland   | R1a1a* | 17 | 12 | 13 | 18 | 25 | 11 | 11 | 13 | 11 | 10 |
| Russia   | R1a1a* | 16 | 12 | 13 | 16 | 25 | 11 | 11 | 14 | 11 | 10 |
| Russia   | R1a1a* | 16 | 12 | 13 | 17 | 25 | 10 | 11 | 13 | 10 | 10 |
| Russia   | R1a1a* | 16 | 12 | 13 | 17 | 25 | 11 | 11 | 13 | 10 | 10 |
| Russia   | R1a1a* | 16 | 12 | 13 | 17 | 25 | 11 | 11 | 13 | 10 | 10 |
| Russia   | R1a1a* | 16 | 12 | 13 | 17 | 26 | 11 | 11 | 13 | 10 | 11 |
| Russia   | R1a1a* | 14 | 12 | 14 | 17 | 25 | 11 | 11 | 13 | 10 | 11 |
| Russia   | R1a1a* | 12 | 12 | 13 | 16 | 25 | 11 | 11 | 13 | 10 | 10 |
| Russia   | R1a1a* | 16 | 12 | 13 | 17 | 25 | 11 | 11 | 13 | 10 | 11 |
| Russia   | R1a1a* | 15 | 12 | 13 | 18 | 24 | 11 | 11 | 14 | 10 | 10 |
| Russia   | R1a1a* | 14 | 12 | 13 | 16 | 25 | 11 | 11 | 13 | 10 | 10 |
| Slovakia | R1a1a* | 15 | 12 | 13 | 17 | 25 | 9  | 11 | 14 | 10 | 10 |
| Slovakia | R1a1a* | 15 | 12 | 13 | 17 | 25 | 10 | 11 | 13 | 10 | 10 |
| Slovakia | R1a1a* | 15 | 12 | 13 | 17 | 25 | 10 | 11 | 13 | 12 | 10 |
| Slovakia | R1a1a* | 15 | 12 | 13 | 17 | 25 | 10 | 11 | 13 | 10 | 10 |
| Slovakia | R1a1a* | 15 | 12 | 13 | 17 | 25 | 10 | 11 | 13 | 10 | 10 |
| Slovakia | R1a1a* | 15 | 12 | 13 | 17 | 26 | 11 | 11 | 13 | 10 | 10 |
| Slovakia | R1a1a* | 15 | 12 | 14 | 17 | 24 | 11 | 11 | 13 | 10 | 10 |
| Slovakia | R1a1a* | 15 | 12 | 14 | 17 | 25 | 10 | 11 | 13 | 10 | 10 |
| Slovakia | R1a1a* | 15 | 12 | 14 | 17 | 25 | 11 | 11 | 13 | 10 | 10 |
| Slovakia | R1a1a* | 15 | 12 | 14 | 18 |    | 10 | 11 | 13 | 10 | 10 |
| Slovakia | R1a1a* | 15 | 12 | 13 | 16 | 24 | 11 | 11 | 13 | 11 | 10 |

|          |        |    |    |    |    |    |    |    |    |    |    |
|----------|--------|----|----|----|----|----|----|----|----|----|----|
| Slovakia | R1a1a* | 15 | 12 | 13 | 16 | 24 | 11 | 11 | 13 | 11 | 11 |
| Slovakia | R1a1a* | 15 | 12 | 13 | 16 | 25 | 10 | 11 | 13 | 11 | 10 |
| Slovakia | R1a1a* | 15 | 12 | 13 | 16 | 25 | 11 | 11 | 13 | 11 | 10 |
| Slovakia | R1a1a* | 15 | 12 | 13 | 16 | 25 | 11 | 11 | 13 | 11 | 10 |
| Slovakia | R1a1a* | 15 | 12 | 13 | 18 | 25 | 10 | 11 | 13 | 11 | 10 |
| Slovakia | R1a1a* | 15 | 12 | 13 | 17 | 25 | 11 | 11 | 13 | 10 | 10 |
| Slovakia | R1a1a* | 15 | 12 | 13 | 16 | 24 | 10 | 11 | 13 | 11 | 10 |
| Slovakia | R1a1a* | 15 | 12 | 13 | 16 | 26 | 10 | 11 | 13 | 12 | 10 |
| Slovakia | R1a1a* | 15 | 12 | 13 | 18 | 25 | 10 | 11 | 13 | 10 | 10 |
| Slovakia | R1a1a* | 15 | 12 | 13 | 17 | 25 | 10 | 11 | 13 | 10 | 10 |
| Slovakia | R1a1a* | 16 | 12 | 14 | 17 | 26 | 11 | 11 | 13 | 11 | 11 |
| Slovakia | R1a1a* | 16 | 12 | 13 | 17 | 25 | 11 | 11 | 13 | 11 | 11 |
| Slovakia | R1a1a* | 16 | 13 | 14 | 17 | 25 | 11 | 11 | 13 | 10 | 10 |
| Slovakia | R1a1a* | 16 | 12 | 13 | 17 | 25 | 11 | 11 | 13 | 10 | 10 |
| Slovakia | R1a1a* | 16 | 12 | 14 | 17 | 25 | 12 | 11 | 13 | 10 | 10 |
| Slovakia | R1a1a* | 16 | 12 | 14 | 17 | 25 | 10 | 11 | 13 | 10 | 10 |
| Slovakia | R1a1a* | 16 |    | 14 | 18 | 25 | 11 | 11 | 13 | 10 |    |
| Slovakia | R1a1a* | 16 | 12 | 13 | 17 | 25 | 10 | 11 | 13 | 10 | 10 |
| Slovakia | R1a1a* | 16 | 12 | 14 | 17 | 24 | 11 | 11 | 13 | 10 | 10 |
| Slovakia | R1a1a* | 16 | 12 | 13 | 17 | 25 | 10 | 11 | 13 | 10 | 10 |
| Slovakia | R1a1a* | 16 | 12 | 13 | 17 | 24 | 10 | 11 | 13 | 10 | 10 |
| Slovakia | R1a1a* | 16 | 12 | 13 | 17 | 25 | 11 | 11 | 13 | 11 | 11 |
| Slovakia | R1a1a* | 16 | 12 | 13 | 17 | 25 | 10 | 11 | 13 | 10 | 10 |
| Slovakia | R1a1a* | 16 | 12 | 13 | 17 | 24 | 10 | 11 | 14 | 12 | 10 |
| Slovakia | R1a1a* | 16 | 12 | 13 | 17 | 25 | 12 | 11 | 13 | 11 | 10 |
| Slovakia | R1a1a* | 16 | 12 | 14 | 17 | 25 | 10 | 11 | 13 | 10 | 10 |
| Slovakia | R1a1a* | 16 | 12 | 14 | 17 | 25 | 12 | 11 | 13 | 11 | 10 |
| Slovakia | R1a1a* | 16 | 12 | 15 | 19 | 24 | 11 | 11 | 13 | 10 | 10 |
| Slovakia | R1a1a* | 16 | 12 | 13 | 17 | 25 | 10 | 11 | 13 | 10 | 10 |
| Slovakia | R1a1a* | 16 | 12 | 13 | 17 | 23 | 10 | 11 | 13 | 11 | 11 |
| Slovakia | R1a1a* | 16 | 12 | 13 | 17 | 25 | 11 | 11 | 13 | 11 | 10 |
| Slovakia | R1a1a* | 16 | 12 | 14 | 17 | 24 | 11 | 11 | 13 | 10 | 10 |
| Slovakia | R1a1a* | 16 | 12 | 14 | 17 | 24 | 11 | 11 | 13 | 10 |    |
| Slovakia | R1a1a* | 16 | 12 | 14 | 17 | 24 | 11 | 11 | 13 | 10 |    |
| Slovakia | R1a1a* | 16 | 12 | 13 | 17 | 24 | 11 | 11 | 13 | 10 | 10 |

|          |        |    |    |    |    |    |    |    |    |    |    |
|----------|--------|----|----|----|----|----|----|----|----|----|----|
| Slovakia | R1a1a* | 16 | 12 | 15 | 17 | 25 | 10 | 11 | 13 | 10 | 10 |
| Slovakia | R1a1a* | 16 | 12 | 13 | 17 | 25 | 12 | 11 | 13 | 11 | 11 |
| Slovakia | R1a1a* | 16 | 12 | 14 | 16 | 24 | 11 | 11 | 13 | 10 | 10 |
| Slovakia | R1a1a* | 16 | 12 | 14 | 18 | 25 | 11 | 11 | 13 | 10 | 10 |
| Slovakia | R1a1a* | 16 | 12 | 13 | 17 | 25 | 11 | 11 | 13 | 10 | 10 |
| Slovakia | R1a1a* | 16 | 12 | 13 | 17 | 23 | 11 | 11 | 13 | 12 | 10 |
| Slovakia | R1a1a* | 16 | 12 | 14 | 17 | 25 | 11 | 11 | 13 | 11 | 10 |
| Slovakia | R1a1a* | 16 | 12 | 14 | 17 | 25 | 11 | 11 | 13 | 10 | 10 |
| Slovakia | R1a1a* | 16 | 12 | 13 | 17 | 25 | 11 | 11 | 13 | 10 | 10 |
| Slovakia | R1a1a* | 16 | 12 | 14 | 18 | 25 | 12 | 11 | 13 | 10 | 10 |
| Slovakia | R1a1a* | 16 | 12 | 14 | 17 | 23 | 11 | 11 | 13 | 10 | 10 |
| Slovakia | R1a1a* | 16 | 12 | 15 | 16 | 25 | 11 | 11 | 13 | 10 | 10 |
| Slovakia | R1a1a* | 16 | 12 | 14 | 18 | 25 | 11 | 11 | 14 | 10 | 10 |
| Slovakia | R1a1a* | 16 | 12 | 13 | 16 | 25 | 11 | 11 | 13 | 11 | 10 |
| Slovakia | R1a1a* | 16 | 12 | 13 | 17 | 24 | 11 | 11 | 13 | 10 | 10 |
| Slovakia | R1a1a* | 17 | 12 | 13 | 17 | 25 | 11 | 11 | 13 | 11 | 11 |
| Slovakia | R1a1a* | 17 | 12 | 13 | 18 | 25 | 10 | 11 | 13 | 11 | 11 |
| Slovakia | R1a1a* | 17 | 12 | 14 | 17 | 25 | 11 | 11 | 13 | 8  | 10 |
| Slovakia | R1a1a* | 17 | 12 | 14 | 17 | 24 | 11 | 11 | 13 | 12 | 11 |
| Slovakia | R1a1a* | 17 | 12 | 14 | 17 | 25 | 11 | 11 | 13 | 10 | 10 |
| Slovakia | R1a1a* | 17 | 12 | 13 | 17 | 25 | 10 | 11 | 13 | 10 | 10 |
| Slovakia | R1a1a* | 17 | 12 | 13 | 17 | 25 | 11 | 11 | 14 | 11 | 10 |
| Slovakia | R1a1a* | 16 | 12 | 13 | 17 | 25 | 11 | 11 | 13 | 11 | 10 |
| Slovakia | R1a1a* | 16 | 13 | 13 | 17 | 25 | 12 | 11 | 13 | 10 | 10 |
| Slovakia | R1a1a* | 18 | 12 | 13 | 16 | 24 | 12 | 11 | 13 | 10 | 10 |
| Slovenia | R1a1a* | 16 | 12 | 14 | 17 | 24 | 11 | 11 | 13 | 10 | 10 |
| Slovenia | R1a1a* | 16 | 12 | 15 | 18 | 25 | 10 | 11 | 13 | 10 | 10 |
| Slovenia | R1a1a* | 16 | 12 | 14 | 17 | 25 | 10 | 11 | 13 | 10 | 10 |
| Slovenia | R1a1a* | 16 | 12 | 14 | 17 | 25 | 11 | 11 | 13 | 10 | 10 |
| Slovenia | R1a1a* | 16 | 12 | 12 | 17 | 25 | 10 | 11 | 13 | 10 | 10 |
| Slovenia | R1a1a* | 16 | 12 | 14 | 17 | 25 | 11 | 11 | 13 | 10 | 10 |
| Slovenia | R1a1a* | 16 | 12 | 13 | 16 | 25 | 10 | 11 | 13 | 10 | 10 |
| Slovenia | R1a1a* | 16 | 12 | 14 | 17 | 25 | 11 | 11 | 13 | 10 | 10 |
| Slovenia | R1a1a* | 15 | 12 | 14 | 17 | 25 | 11 | 11 | 13 | 11 | 11 |

|             |        |    |    |    |       |    |    |    |    |    |    |
|-------------|--------|----|----|----|-------|----|----|----|----|----|----|
| Slovenia    | R1a1a* | 16 | 12 | 13 | 16    | 26 | 11 | 11 | 13 | 10 | 10 |
| Slovenia    | R1a1a* | 17 | 12 | 13 | 17    | 25 | 10 | 11 | 13 | 10 | 10 |
| Slovenia    | R1a1a* | 16 | 12 | 14 | 17    | 25 | 11 | 11 | 13 | 10 | 10 |
| Slovenia    | R1a1a* | 16 | 12 | 14 | 17    | 25 | 11 |    | 13 | 10 | 10 |
| Slovenia    | R1a1a* | 15 | 12 | 13 | 16    | 26 | 10 | 11 | 13 | 11 | 10 |
| Slovenia    | R1a1a* | 16 | 12 | 13 | 16    | 25 | 11 | 11 | 13 | 11 | 10 |
| Slovenia    | R1a1a* | 16 | 12 | 13 | 17-18 | 25 | 10 | 11 | 13 | 10 | 10 |
| Slovenia    | R1a1a* | 17 | 12 | 14 | 17    | 24 | 11 | 11 | 13 | 10 | 10 |
| Slovenia    | R1a1a* | 16 | 12 | 13 | 17    | 24 | 10 | 11 | 13 | 11 | 10 |
| Slovenia    | R1a1a* | 16 | 12 | 13 | 17    | 25 | 10 | 11 | 13 | 10 | 10 |
| Slovenia    | R1a1a* | 16 | 12 | 13 | 17    | 24 | 10 | 11 | 13 | 10 | 10 |
| Slovenia    | R1a1a* | 15 | 12 | 13 | 17    | 25 | 10 | 11 | 13 | 10 | 10 |
| Slovenia    | R1a1a* | 16 | 12 | 13 | 17    | 25 | 10 | 11 | 12 | 10 | 10 |
| Slovenia    | R1a1a* | 16 | 12 | 13 | 17    | 26 | 10 | 11 | 13 | 10 | 10 |
| Slovenia    | R1a1a* | 16 | 12 | 13 | 16    | 25 | 10 | 11 | 13 | 10 | 10 |
| Slovenia    | R1a1a* | 16 | 12 | 13 | 17    | 25 | 10 | 11 | 13 | 10 | 10 |
| Slovenia    | R1a1a* | 15 | 12 | 14 | 17    | 25 | 10 | 11 | 13 | 10 | 10 |
| Slovenia    | R1a1a* | 16 | 12 | 13 | 17    | 25 | 10 | 11 | 13 | 11 | 10 |
| Slovenia    | R1a1a* | 16 | 12 | 13 | 17    | 25 | 10 | 11 | 13 | 10 | 10 |
| Slovenia    | R1a1a* | 16 | 12 | 13 | 17    | 25 | 10 | 11 | 13 | 10 | 10 |
| Slovenia    | R1a1a* | 16 | 12 | 13 | 18    | 25 | 11 | 11 | 13 | 11 | 11 |
| Slovenia    | R1a1a* | 16 | 12 | 13 | 17    | 26 | 10 | 11 | 13 | 11 | 10 |
| Slovenia    | R1a1a* | 16 | 12 | 13 | 17    | 25 | 10 | 11 | 13 | 10 | 10 |
| Slovenia    | R1a1a* | 15 | 12 | 13 | 17    | 24 | 10 | 11 | 13 | 10 | 10 |
| Switzerland | R1a1a* | 15 | 12 | 13 | 17    | 25 | 10 | 11 | 13 | 10 | 10 |
| Switzerland | R1a1a* | 16 | 13 | 13 | 18    | 24 | 11 | 11 | 14 | 10 | 10 |
| Switzerland | R1a1a* | 16 | 12 | 13 | 18    | 25 | 11 | 11 | 14 | 10 | 10 |
| Turkey      | R1a1a* | 15 | 12 | 13 | 17    | 24 | 11 | 11 | 13 | 10 | 10 |
| Turkey      | R1a1a* | 15 | 12 | 13 | 18    | 25 | 11 | 11 | 13 | 10 | 10 |
| Turkey      | R1a1a* | 15 | 12 | 14 | 16    | 25 | 11 | 11 | 13 | 10 | 10 |
| Turkey      | R1a1a* | 16 | 12 | 13 | 17    | 25 | 11 | 11 | 13 | 10 | 10 |
| Turkey      | R1a1a* | 17 | 12 | 13 | 18    | 25 | 11 | 11 | 13 | 10 | 11 |
| Turkey      | R1a1a* | 16 | 12 | 13 | 18    | 26 | 10 | 11 | 13 | 10 | 11 |
| Turkey      | R1a1a* | 17 | 12 | 13 | 17    | 25 | 11 | 11 | 13 | 11 | 11 |

|        |        |    |    |    |    |    |    |    |    |    |    |
|--------|--------|----|----|----|----|----|----|----|----|----|----|
| Turkey | R1a1a* | 15 | 12 | 12 | 17 | 24 | 10 | 11 | 13 | 10 | 10 |
| Turkey | R1a1a* | 15 | 12 | 13 | 17 | 25 | 11 | 11 | 13 | 10 | 10 |
| Turkey | R1a1a* | 16 | 12 | 13 | 17 | 23 | 11 | 11 | 13 | 11 | 10 |
| Turkey | R1a1a* | 14 | 13 | 13 | 17 | 25 | 11 | 11 | 13 | 11 | 10 |
| Turkey | R1a1a* | 16 | 12 | 13 | 17 | 25 | 11 | 11 | 13 | 10 | 10 |
| Turkey | R1a1a* | 16 | 12 | 13 | 17 | 25 | 11 | 11 | 13 | 10 | 10 |
| Turkey | R1a1a* | 16 | 12 | 13 | 17 | 24 | 11 | 11 | 13 | 10 | 10 |
| Turkey | R1a1a* | 16 | 12 | 13 | 17 | 25 | 11 | 11 | 13 | 10 | 10 |
| Turkey | R1a1a* | 15 | 12 | 14 | 16 | 25 | 11 | 11 | 13 | 11 | 11 |
| Turkey | R1a1a* | 16 | 12 | 13 | 18 | 24 | 10 | 11 | 13 | 11 | 10 |
| Turkey | R1a1a* | 15 | 12 | 14 | 16 | 25 | 11 | 11 | 13 | 10 | 10 |
| Turkey | R1a1a* | 15 | 12 | 13 | 17 | 24 | 12 | 11 | 13 | 10 | 10 |
| Turkey | R1a1a* | 16 | 12 | 13 | 17 | 25 | 11 | 11 | 13 | 10 | 10 |
| Turkey | R1a1a* | 15 | 12 | 14 | 16 | 25 | 11 | 11 | 14 | 10 | 10 |
| Turkey | R1a1a* | 15 | 12 | 14 | 18 | 25 | 11 | 11 | 13 | 10 | 10 |
| Turkey | R1a1a* | 16 | 12 | 14 | 17 | 25 | 10 | 11 | 13 | 10 | 10 |
| Turkey | R1a1a* | 16 | 12 | 13 | 17 | 25 | 10 | 11 | 13 | 10 | 10 |
| Turkey | R1a1a* | 17 | 12 | 13 | 17 | 25 | 11 | 11 | 13 | 11 | 11 |
| Turkey | R1a1a* | 16 | 12 | 13 | 19 | 25 | 11 | 11 | 14 | 10 | 10 |
| Turkey | R1a1a* | 15 | 12 | 13 | 17 | 25 | 10 | 11 | 13 | 10 | 10 |
| Turkey | R1a1a* | 16 | 12 | 12 | 18 | 25 | 11 | 11 | 13 | 11 | 10 |
| Turkey | R1a1a* | 16 | 12 | 13 | 17 | 24 | 11 | 11 | 13 | 10 | 10 |
| Turkey | R1a1a* | 16 | 12 | 13 | 17 | 25 | 10 | 11 | 13 | 10 | 11 |
| Turkey | R1a1a* | 16 | 12 | 12 | 18 | 25 | 11 | 11 | 13 | 11 | 10 |
| Turkey | R1a1a* | 15 | 12 | 12 | 17 | 25 | 11 | 11 | 13 | 10 | 10 |
| Turkey | R1a1a* | 15 | 12 | 13 | 19 | 25 | 11 | 11 | 13 | 10 | 10 |
| Turkey | R1a1a* | 16 | 12 | 13 | 16 | 24 | 11 | 11 | 13 | 10 | 10 |
| Tuva   | R1a1a* | 15 | 12 | 13 | 17 | 26 | 9  | 11 | 13 | 10 | 10 |
| Tuva   | R1a1a* | 15 | 12 | 13 | 17 | 26 | 9  | 11 | 13 | 10 | 10 |
| Tuva   | R1a1a* | 15 | 12 | 13 | 17 | 26 | 9  | 11 | 13 | 10 | 10 |
| Tuva   | R1a1a* | 16 | 12 | 14 | 17 | 25 | 11 | 11 | 13 | 11 | 10 |
| UAE    | R1a1a* | 15 | 12 | 13 | 16 | 26 | 11 | 11 | 14 | 10 | 9  |
| UAE    | R1a1a* | 17 | 12 | 13 | 17 | 25 | 11 | 11 | 13 | 11 | 10 |
| UAE    | R1a1a* | 15 | 12 | 13 | 17 | 25 | 11 | 11 | 13 | 10 | 10 |

|          |         |    |    |    |    |    |    |    |    |    |    |
|----------|---------|----|----|----|----|----|----|----|----|----|----|
| UAE      | R1a1a*  | 16 | 12 | 13 | 18 | 24 | 11 | 11 | 13 | 10 | 10 |
| UAE      | R1a1a*  | 16 | 12 | 13 | 16 | 25 | 10 | 11 | 13 | 10 | 10 |
| UAE      | R1a1a*  | 16 | 12 | 12 | 18 | 25 | 11 | 11 | 13 | 10 | 10 |
| UAE      | R1a1a*  | 16 | 12 | 13 | 17 | 24 | 11 | 11 | 13 | 10 | 10 |
| UAE      | R1a1a*  | 15 | 12 | 12 | 18 | 25 | 11 | 11 | 13 | 10 | 10 |
| UAE      | R1a1a*  | 15 | 12 | 13 | 17 | 24 | 11 | 11 | 13 | 10 | 10 |
| UAE      | R1a1a*  | 15 | 12 | 14 | 17 | 22 | 11 | 11 | 13 | 10 | 10 |
| UAE      | R1a1a*  | 16 | 12 | 13 | 16 | 25 | 11 | 11 | 13 | 10 | 10 |
| UAE      | R1a1a*  | 16 | 12 | 13 | 17 | 24 | 11 | 11 | 13 | 10 | 10 |
| Ukraine  | R1a1a*  | 16 | 12 | 13 | 17 | 25 | 10 | 11 | 13 | 10 | 10 |
| Ukraine  | R1a1a*  | 16 | 12 | 13 | 16 | 25 | 11 | 11 | 13 | 10 | 10 |
| Ukraine  | R1a1a*  | 18 | 12 | 13 | 17 | 25 | 11 | 11 | 13 | 11 | 10 |
| Ukraine  | R1a1a*  | 16 | 12 | 12 | 18 | 25 | 11 | 11 | 13 | 10 | 10 |
| Ukraine  | R1a1a*  | 16 | 12 | 14 | 17 | 25 | 10 | 11 | 13 | 10 | 10 |
| Ukraine  | R1a1a*  | 16 | 12 | 13 | 18 | 25 | 11 | 11 | 13 | 10 | 10 |
| Ukraine  | R1a1a*  | 16 | 12 | 13 | 17 | 25 | 11 | 11 | 13 | 10 | 9  |
| Ukraine  | R1a1a*  | 15 | 12 | 14 | 17 | 25 | 10 | 11 | 13 | 12 | 10 |
| Ukraine  | R1a1a*  | 16 | 12 | 13 | 17 | 25 | 11 | 11 | 13 | 10 | 10 |
| Ukraine  | R1a1a*  | 15 | 12 | 13 | 17 | 25 | 10 | 11 | 13 | 10 | 10 |
| Ukraine  | R1a1a*  | 17 | 12 | 13 | 18 | 25 | 11 | 12 | 13 | 11 | 11 |
| Ukraine  | R1a1a*  | 15 | 12 | 13 | 16 | 25 | 11 | 11 | 13 | 11 | 10 |
| Ukraine  | R1a1a*  | 16 | 12 | 14 | 17 | 24 | 11 | 11 | 13 | 10 | 10 |
| Ukraine  | R1a1a*  | 16 | 12 | 13 | 17 | 25 | 11 | 11 | 13 | 10 | 10 |
| Ukraine  | R1a1a*  | 16 | 12 | 13 | 17 | 25 | 10 | 11 | 13 | 10 | 10 |
| Ukraine  | R1a1a*  | 16 | 12 | 13 | 17 | 25 | 11 | 11 | 13 | 10 | 10 |
| Ukraine  | R1a1a*  | 16 | 12 | 13 | 16 | 25 | 11 | 11 | 13 | 11 | 11 |
| Ukraine  | R1a1a*  | 17 | 12 | 13 | 17 | 25 | 11 | 11 | 13 | 10 | 10 |
| Adygei   | R1a1a7* | 16 | 12 | 13 | 16 | 25 | 10 | 11 | 13 | 11 | 10 |
| Austria  | R1a1a7* | 17 | 12 | 14 | 17 | 25 | 10 | 11 | 13 | 10 | 10 |
| Austria  | R1a1a7* | 16 | 12 | 13 | 16 | 26 | 10 | 11 | 13 | 11 | 10 |
| Caucasus | R1a1a7* | 17 | 12 | 13 | 17 | 24 | 12 | 11 | 13 | 10 | 11 |
| Caucasus | R1a1a7* | 16 | 12 | 13 | 17 | 25 | 10 | 11 | 13 | 11 | 10 |
| Caucasus | R1a1a7* | 16 | 12 | 13 | 16 | 25 | 10 | 11 | 13 | 11 | 10 |
| Caucasus | R1a1a7* | 17 | 12 | 13 | 17 | 25 | 10 | 11 | 13 | 10 | 10 |

|          |         |    |    |    |    |    |    |    |    |    |    |
|----------|---------|----|----|----|----|----|----|----|----|----|----|
| Caucasus | R1a1a7* | 17 | 12 | 13 | 17 | 25 | 10 | 11 | 13 | 10 | 10 |
| Caucasus | R1a1a7* | 16 | 12 | 13 | 16 | 25 | 10 | 11 | 13 | 11 | 10 |
| Caucasus | R1a1a7* | 16 | 12 | 13 | 17 | 25 | 10 | 11 | 13 | 10 | 10 |
| Caucasus | R1a1a7* | 15 | 12 | 13 | 16 | 25 | 10 | 11 |    | 11 | 10 |
| Caucasus | R1a1a7* | 16 | 12 | 13 | 16 | 25 | 10 | 11 | 13 | 12 | 10 |
| Caucasus | R1a1a7* | 16 | 12 | 13 | 16 | 25 | 10 | 11 | 13 | 11 | 10 |
| Caucasus | R1a1a7* | 16 | 12 | 13 | 16 | 25 | 10 | 11 | 13 | 10 | 10 |
| Caucasus | R1a1a7* | 16 | 12 | 13 | 16 | 24 | 10 | 11 | 13 | 10 | 10 |
| Caucasus | R1a1a7* | 15 | 12 | 14 | 16 | 25 | 9  | 11 | 13 | 11 | 10 |
| Caucasus | R1a1a7* | 15 | 12 | 14 | 16 | 25 | 9  | 11 | 13 | 11 | 10 |
| Caucasus | R1a1a7* | 15 | 12 | 14 | 16 | 25 | 9  | 11 | 13 | 11 | 10 |
| Caucasus | R1a1a7* | 16 | 12 | 13 | 17 | 25 | 10 | 11 | 13 | 10 | 10 |
| Caucasus | R1a1a7* | 17 | 13 | 13 | 16 | 25 | 10 | 11 | 13 | 11 | 10 |
| Caucasus | R1a1a7* | 17 | 13 | 13 | 16 | 25 | 10 | 11 | 13 | 11 | 10 |
| Caucasus | R1a1a7* | 17 | 12 | 13 | 17 | 25 | 10 | 11 | 13 | 10 | 10 |
| Caucasus | R1a1a7* | 17 | 13 | 13 | 16 | 25 | 10 | 11 | 13 | 11 | 10 |
| Caucasus | R1a1a7* | 17 | 12 | 13 | 17 | 25 | 10 | 11 | 13 | 10 | 10 |
| Caucasus | R1a1a7* | 17 | 13 | 13 | 16 | 25 | 10 | 11 | 13 | 11 | 10 |
| Caucasus | R1a1a7* | 17 | 12 | 13 | 17 | 25 | 10 | 11 | 13 | 10 | 10 |
| Caucasus | R1a1a7* | 17 | 13 | 13 | 16 | 25 | 10 | 11 | 13 | 11 | 10 |
| Caucasus | R1a1a7* | 16 | 12 | 12 | 16 | 26 | 10 | 11 | 13 | 11 | 10 |
| Crete    | R1a1a7* | 16 | 12 | 13 | 15 | 25 | 10 | 11 | 13 | 11 | 10 |
| Crete    | R1a1a7* | 16 | 12 | 13 | 15 | 25 | 10 | 11 | 13 | 11 | 10 |
| Crete    | R1a1a7* | 16 | 12 | 13 | 16 | 24 | 10 | 11 | 13 | 11 | 10 |
| Crete    | R1a1a7* | 16 | 12 | 13 | 16 | 25 | 10 | 11 | 13 | 12 | 10 |
| Crete    | R1a1a7* | 16 | 12 |    |    | 24 | 10 | 11 |    | 11 | 10 |
| Crete    | R1a1a7* | 15 | 12 | 13 | 17 | 24 | 10 | 11 | 14 | 12 | 10 |
| Crete    | R1a1a7* | 16 | 12 | 13 | 17 | 25 | 9  | 11 | 13 | 11 | 10 |
| Croatia  | R1a1a7* | 16 | 12 | 13 | 15 | 25 | 10 | 11 | 13 | 10 | 10 |
| Croatia  | R1a1a7* | 16 | 12 | 13 | 16 | 25 | 10 | 11 | 13 | 11 | 10 |
| Croatia  | R1a1a7* | 16 | 12 | 13 | 17 | 25 | 10 | 11 | 13 | 12 | 10 |
| Croatia  | R1a1a7* | 16 | 12 | 13 | 16 | 25 | 10 | 11 | 13 |    |    |
| Croatia  | R1a1a7* | 15 | 12 | 13 | 16 | 25 | 10 | 11 | 13 | 11 | 10 |
| Croatia  | R1a1a7* | 17 | 12 | 13 | 17 | 25 | 10 | 11 | 14 | 10 | 10 |
| Croatia  | R1a1a7* | 16 | 12 | 13 | 16 | 25 | 11 | 11 | 13 | 10 | 10 |
| Croatia  | R1a1a7* | 16 | 12 | 13 | 16 | 25 | 10 | 11 | 13 | 11 | 10 |



|                |         |    |    |    |    |    |    |    |    |    |    |
|----------------|---------|----|----|----|----|----|----|----|----|----|----|
| Croatia        | R1a1a7* | 15 | 12 | 13 | 16 | 25 | 11 | 11 | 13 | 11 | 10 |
| Croatia        | R1a1a7* | 16 | 12 | 13 | 16 | 24 | 10 | 11 | 13 | 11 | 10 |
| Croatia        | R1a1a7* | 16 | 12 | 13 | 16 | 25 | 10 | 11 | 13 | 11 | 10 |
| Croatia        | R1a1a7* | 16 | 12 | 13 | 16 | 25 | 10 | 11 | 13 | 11 | 10 |
| Croatia        | R1a1a7* | 16 | 12 | 13 | 17 | 24 | 10 | 11 | 13 | 11 | 10 |
| Croatia        | R1a1a7* | 16 | 12 | 13 | 17 | 25 | 10 | 11 | 13 | 11 | 10 |
| Croatia        | R1a1a7* | 17 | 12 | 13 | 17 | 26 | 10 | 11 | 13 | 11 | 10 |
| Croatia        | R1a1a7* | 17 | 12 | 13 | 17 | 26 | 10 | 11 | 13 | 11 | 10 |
| Croatia        | R1a1a7* | 17 | 12 | 13 | 17 | 26 | 10 | 11 | 13 | 11 | 10 |
| Croatia        | R1a1a7* | 17 | 12 | 13 | 17 | 26 | 10 | 11 | 13 | 11 | 10 |
| Croatia        | R1a1a7* | 16 | 12 | 13 | 16 | 25 | 10 | 11 | 13 | 11 | 10 |
| Czech Republic | R1a1a7* | 16 | 12 | 13 | 16 | 25 | 10 | 11 | 13 | 11 | 10 |
| Czech Republic | R1a1a7* | 16 | 12 | 13 | 16 | 25 | 10 | 11 | 13 | 11 | 10 |
| Czech Republic | R1a1a7* | 17 | 12 | 13 | 17 | 25 | 10 | 11 | 14 | 10 | 10 |
| Czech Republic | R1a1a7* | 17 | 12 | 13 | 17 | 25 | 10 | 11 | 13 | 10 | 10 |
| Czech Republic | R1a1a7* | 17 | 12 | 13 | 17 | 26 | 10 | 11 | 13 | 11 | 10 |
| Czech Republic | R1a1a7* | 16 | 12 | 13 | 16 | 24 | 10 | 11 | 13 | 11 | 10 |
| Czech Republic | R1a1a7* | 16 | 12 | 13 | 17 | 25 | 10 | 11 | 13 | 11 | 10 |
| Denmark        | R1a1a7* | 16 | 12 | 13 | 17 | 25 | 10 | 11 | 13 | 11 | 10 |
| Estonia        | R1a1a7* | 15 | 12 | 13 | 16 | 25 | 10 | 11 | 13 | 11 | 10 |
| Estonia        | R1a1a7* | 15 | 12 | 13 | 16 | 25 | 10 | 11 | 13 | 11 | 10 |
| Estonia        | R1a1a7* | 15 | 12 | 13 | 16 | 25 | 10 | 11 | 13 | 11 | 10 |
| Estonia        | R1a1a7* | 16 | 12 | 13 | 16 | 25 | 10 | 11 | 13 | 11 | 10 |
| Estonia        | R1a1a7* | 15 | 12 | 13 | 16 | 24 | 11 | 11 | 13 | 11 | 10 |
| Estonia        | R1a1a7* | 15 | 12 | 13 | 16 | 24 | 10 | 11 | 13 | 11 | 10 |
| Estonia        | R1a1a7* | 15 | 12 | 13 | 16 | 25 | 10 | 11 | 13 | 12 | 10 |
| Estonia        | R1a1a7* | 16 | 12 | 13 | 16 | 24 | 10 | 11 | 13 | 11 | 10 |
| Estonia        | R1a1a7* | 16 | 12 | 13 | 17 | 25 | 10 | 11 | 13 | 11 | 10 |
| Estonia        | R1a1a7* | 17 | 12 | 13 | 17 | 25 | 10 | 11 | 13 | 10 | 10 |
| Estonia        | R1a1a7* | 17 | 12 | 13 | 17 | 25 | 10 | 11 | 13 | 11 | 10 |
| Germany        | R1a1a7* | 17 | 12 | 13 | 17 | 25 | 11 | 11 | 13 | 10 | 10 |
| Germany        | R1a1a7* | 16 | 12 | 13 | 16 | 26 | 10 | 11 | 13 | 11 | 10 |
| Germany        | R1a1a7* | 17 | 12 | 13 | 17 | 25 | 10 | 11 | 13 | 10 | 10 |
| Germany        | R1a1a7* | 17 | 12 | 13 | 17 | 25 | 10 | 11 | 13 | 10 | 10 |
| Germany        | R1a1a7* | 16 | 12 | 13 | 16 | 25 | 10 | 11 | 13 | 11 | 10 |

|             |         |    |    |    |    |    |    |    |    |    |    |
|-------------|---------|----|----|----|----|----|----|----|----|----|----|
| Germany     | R1a1a7* | 16 | 12 | 13 | 17 | 25 | 10 | 11 | 13 | 11 | 10 |
| Germany     | R1a1a7* | 16 | 12 | 13 | 16 | 25 | 10 | 11 | 13 | 11 | 10 |
| Germany     | R1a1a7* | 16 | 12 | 14 | 16 | 24 | 10 | 11 | 14 | 11 | 10 |
| Germany     | R1a1a7* | 18 | 12 | 13 | 16 | 25 | 10 | 11 | 13 | 13 | 10 |
| Germany     | R1a1a7* | 16 | 12 | 13 | 16 | 26 | 10 | 11 | 13 | 11 | 10 |
| Germany     | R1a1a7* | 16 | 12 | 13 | 16 | 25 | 10 | 11 | 13 | 11 | 10 |
| Germany     | R1a1a7* | 16 | 12 | 14 | 16 | 25 | 10 | 11 | 13 | 11 | 10 |
| Germany     | R1a1a7* | 16 | 12 | 12 | 17 | 25 | 10 | 11 | 13 | 10 | 10 |
| Germany     | R1a1a7* | 16 | 12 | 13 | 16 | 25 | 10 | 11 | 13 | 11 | 10 |
| Germany     | R1a1a7* | 16 | 12 | 12 | 16 | 26 | 10 | 11 | 12 | 11 | 10 |
| Greece      | R1a1a7* | 16 | 12 | 13 | 16 | 25 | 10 | 11 | 13 | 11 | 10 |
| Greece      | R1a1a7* | 16 | 12 | 13 | 16 | 25 | 10 | 11 | 13 | 12 | 10 |
| Greece      | R1a1a7* | 16 | 12 | 13 | 16 | 25 | 10 | 11 | 13 | 11 | 10 |
| Greece      | R1a1a7* | 16 | 12 | 13 | 16 | 25 | 10 | 11 | 13 | 11 | 10 |
| Greece      | R1a1a7* | 16 | 12 | 13 | 16 | 25 | 10 | 11 | 13 | 11 | 10 |
| Greece      | R1a1a7* | 16 | 12 | 13 | 16 | 25 | 10 | 11 | 13 | 11 | 10 |
| Hungarian   | R1a1a7* | 17 | 12 | 13 | 17 | 25 | 10 | 11 | 13 | 10 | 10 |
| Hungarian   | R1a1a7* | 17 | 12 | 13 | 18 | 25 | 10 | 11 | 13 | 12 | 11 |
| Hungarian   | R1a1a7* | 17 | 12 | 14 | 17 | 25 | 10 | 11 | 13 |    |    |
| Hungarian   | R1a1a7* | 17 | 12 | 13 | 16 | 25 | 10 | 11 | 13 | 11 | 10 |
| Hungarian   | R1a1a7* | 18 | 12 | 13 | 17 | 25 | 10 | 11 | 13 | 12 | 10 |
| Karelian    | R1a1a7* | 16 | 12 | 13 | 16 | 25 | 10 | 11 | 13 | 12 | 10 |
| Karelian    | R1a1a7* | 16 | 12 | 13 | 16 | 25 | 10 | 11 | 13 | 11 | 10 |
| Karelian    | R1a1a7* | 16 | 12 | 13 | 16 | 24 | 10 | 11 | 13 | 12 | 10 |
| Karelian    | R1a1a7* | 16 | 12 | 13 | 16 | 25 | 10 | 11 | 13 | 11 | 10 |
| Karelian    | R1a1a7* | 15 | 12 | 13 | 16 | 24 | 10 | 11 | 13 | 11 | 10 |
| Karelian    | R1a1a7* | 16 | 12 | 13 | 16 | 24 | 10 | 11 | 13 | 11 | 10 |
| Karelian    | R1a1a7* | 16 | 12 | 13 | 16 | 25 | 10 | 11 | 13 | 11 | 10 |
| Karelian    | R1a1a7* | 16 | 12 | 13 | 16 | 25 | 10 | 11 | 13 | 11 | 10 |
| Karelian    | R1a1a7* | 16 | 12 | 14 | 16 | 25 | 10 | 11 | 13 | 11 | 10 |
| Karelian    | R1a1a7* | 16 | 12 | 13 | 16 | 24 | 10 | 11 | 13 | 11 | 10 |
| Karelian    | R1a1a7* | 16 | 12 | 13 | 16 | 24 | 10 | 11 | 13 | 11 | 10 |
| Karelian    | R1a1a7* | 16 | 12 | 13 | 16 | 24 | 10 | 11 | 13 | 11 | 10 |
| Karelian    | R1a1a7* | 16 | 12 | 13 | 16 | 24 | 10 | 11 | 13 | 11 | 10 |
| Netherlands | R1a1a7* | 15 | 12 | 13 | 16 | 26 | 10 | 11 | 13 | 11 | 10 |

|             |         |    |    |    |    |    |    |    |    |    |    |
|-------------|---------|----|----|----|----|----|----|----|----|----|----|
| Netherlands | R1a1a7* | 15 | 12 | 13 | 16 | 25 | 10 | 11 | 13 | 11 | 10 |
| Poland      | R1a1a7* | 17 | 12 | 13 | 17 | 26 | 10 | 11 | 13 | 10 | 11 |
| Poland      | R1a1a7* | 18 | 12 | 13 | 17 | 26 | 10 | 11 | 13 | 10 | 10 |
| Poland      | R1a1a7* | 17 | 12 | 13 | 17 | 25 | 10 | 11 | 13 | 10 | 10 |
| Poland      | R1a1a7* | 16 | 12 | 13 | 17 | 25 | 10 | 11 | 13 | 12 | 10 |
| Poland      | R1a1a7* | 16 | 12 | 13 | 17 | 25 | 10 | 11 | 13 | 12 | 10 |
| Poland      | R1a1a7* | 16 | 12 | 13 | 16 | 25 | 10 | 11 | 13 | 11 | 10 |
| Poland      | R1a1a7* | 17 | 12 | 13 | 17 | 25 | 12 | 11 | 13 | 10 | 10 |
| Poland      | R1a1a7* | 15 | 12 | 13 | 16 | 24 | 10 | 11 | 13 | 11 | 10 |
| Poland      | R1a1a7* | 17 | 12 | 13 | 17 | 25 | 10 | 11 | 13 | 10 | 10 |
| Poland      | R1a1a7* | 17 | 12 | 13 | 16 | 24 | 10 | 11 | 13 | 10 | 10 |
| Poland      | R1a1a7* | 15 | 12 | 14 | 17 | 25 | 10 | 11 | 13 | 11 | 10 |
| Poland      | R1a1a7* | 17 | 12 | 13 | 17 | 25 | 10 | 10 | 13 | 10 | 10 |
| Poland      | R1a1a7* | 17 | 12 | 13 | 17 | 25 | 10 | 11 | 13 | 11 | 10 |
| Poland      | R1a1a7* | 15 | 12 | 13 | 16 | 26 | 10 | 11 | 13 | 12 | 10 |
| Poland      | R1a1a7* | 16 | 12 | 13 | 16 | 26 | 10 | 11 | 13 | 11 | 10 |
| Poland      | R1a1a7* | 16 | 12 | 13 | 16 | 25 | 10 | 11 | 13 | 11 | 10 |
| Poland      | R1a1a7* | 16 | 12 | 13 | 17 | 25 | 10 | 11 | 13 | 11 | 10 |
| Poland      | R1a1a7* | 16 | 12 | 13 | 16 | 25 | 10 | 11 | 13 | 11 | 10 |
| Poland      | R1a1a7* | 17 | 12 | 12 | 17 | 24 | 10 | 11 | 13 | 10 | 10 |
| Poland      | R1a1a7* | 17 | 12 | 13 | 19 | 25 | 10 | 11 | 13 | 10 | 10 |
| Poland      | R1a1a7* | 17 | 12 | 13 | 18 | 25 | 10 | 11 | 13 | 10 | 10 |
| Poland      | R1a1a7* | 15 | 12 | 13 | 16 | 26 | 10 | 11 | 13 | 11 | 10 |
| Poland      | R1a1a7* | 17 | 12 | 13 | 17 | 25 | 10 | 11 | 13 | 10 | 10 |
| Poland      | R1a1a7* | 17 | 12 | 14 | 17 | 25 | 10 | 11 | 13 | 10 | 10 |
| Poland      | R1a1a7* | 17 | 12 | 13 | 17 | 25 | 10 | 11 | 13 | 12 | 10 |
| Poland      | R1a1a7* | 17 | 12 | 13 | 17 | 25 | 10 | 11 | 13 | 10 | 10 |
| Poland      | R1a1a7* | 17 | 12 | 13 | 17 | 25 | 11 | 11 | 13 | 10 | 10 |
| Russia      | R1a1a7* | 17 | 12 | 13 | 16 | 24 | 10 | 11 | 13 | 11 | 10 |
| Russia      | R1a1a7* | 17 | 12 | 13 | 17 | 24 | 10 | 11 | 13 | 12 | 10 |
| Russia      | R1a1a7* | 17 | 12 | 13 | 17 | 24 | 10 | 11 | 13 | 11 | 10 |
| Russia      | R1a1a7* | 16 | 12 | 13 | 15 | 25 | 10 | 11 | 13 | 11 | 10 |
| Russia      | R1a1a7* | 17 | 12 | 13 | 17 | 24 | 10 | 11 | 13 | 11 | 10 |
| Russia      | R1a1a7* | 16 |    | 13 | 18 |    | 11 | 11 | 13 | 11 | 10 |

|          |         |    |    |    |    |    |    |    |    |    |    |
|----------|---------|----|----|----|----|----|----|----|----|----|----|
| Russia   | R1a1a7* | 16 | 12 | 13 | 16 | 24 | 11 | 11 | 13 | 11 | 10 |
| Russia   | R1a1a7* | 15 | 12 | 13 | 16 | 25 | 10 | 11 | 13 | 11 | 10 |
| Russia   | R1a1a7* | 16 | 12 | 14 | 16 | 25 | 10 | 11 | 13 | 11 | 10 |
| Russia   | R1a1a7* | 17 | 12 | 13 | 16 | 25 | 10 | 11 | 14 | 11 | 10 |
| Russia   | R1a1a7* | 16 | 12 | 13 | 16 | 24 | 10 | 11 | 13 | 11 | 10 |
| Russia   | R1a1a7* | 17 | 12 | 13 | 16 | 25 | 10 | 11 | 13 | 10 | 10 |
| Slovakia | R1a1a7* | 15 | 12 | 13 | 17 | 25 | 10 | 11 | 13 | 12 | 10 |
| Slovakia | R1a1a7* | 15 | 12 | 13 | 16 | 24 | 10 | 11 | 13 | 11 | 10 |
| Slovakia | R1a1a7* | 16 | 12 | 13 | 17 | 24 | 10 | 11 | 13 | 9  | 10 |
| Slovakia | R1a1a7* | 16 | 12 | 13 | 17 | 25 | 10 | 11 | 13 | 10 | 11 |
| Slovakia | R1a1a7* | 16 | 12 | 13 | 17 | 25 | 10 | 11 | 13 | 10 | 11 |
| Slovakia | R1a1a7* | 16 | 12 | 13 | 17 | 25 | 10 | 11 | 13 | 10 | 10 |
| Slovakia | R1a1a7* | 16 | 12 | 13 | 17 | 25 | 10 | 11 | 13 | 10 | 10 |
| Slovakia | R1a1a7* | 16 | 12 | 13 | 17 | 25 | 10 | 11 | 13 | 10 | 10 |
| Slovakia | R1a1a7* | 16 | 12 | 13 | 17 | 25 | 10 | 11 | 13 | 10 | 10 |
| Slovakia | R1a1a7* | 16 | 12 | 13 | 17 | 25 | 10 | 11 | 13 | 10 | 10 |
| Slovakia | R1a1a7* | 16 | 12 | 13 | 17 | 25 | 10 | 11 | 13 | 11 | 10 |
| Slovakia | R1a1a7* | 16 | 12 | 13 | 18 | 25 | 10 | 11 | 13 | 10 | 11 |
| Slovakia | R1a1a7* | 16 | 12 | 14 | 18 | 25 | 10 | 11 | 12 | 10 | 10 |
| Slovakia | R1a1a7* | 16 | 12 | 13 | 16 | 25 | 10 | 11 | 13 | 11 | 10 |
| Slovakia | R1a1a7* | 16 | 12 | 13 | 16 | 25 | 10 | 11 | 13 | 11 | 10 |
| Slovakia | R1a1a7* | 16 | 12 | 13 | 16 | 24 | 10 | 11 | 13 | 11 | 10 |
| Slovakia | R1a1a7* | 16 | 12 | 13 | 16 | 25 | 10 | 11 | 13 | 11 | 10 |
| Slovakia | R1a1a7* | 16 | 12 | 13 | 16 | 25 | 10 | 11 | 13 | 11 | 10 |
| Slovakia | R1a1a7* | 16 |    | 13 | 16 | 25 | 10 | 11 | 13 | 11 | 10 |
| Slovakia | R1a1a7* | 16 | 12 | 13 | 16 | 25 | 10 | 11 | 13 | 11 | 10 |
| Slovakia | R1a1a7* | 16 | 12 | 13 | 16 | 25 | 10 | 11 | 13 | 11 | 10 |
| Slovakia | R1a1a7* | 16 | 12 | 13 | 16 | 25 | 10 | 11 | 13 | 11 | 10 |
| Slovakia | R1a1a7* | 16 | 12 | 13 | 16 | 25 | 10 | 11 | 13 | 11 | 10 |
| Slovakia | R1a1a7* | 16 | 12 | 13 | 16 | 25 | 10 | 11 | 13 | 11 | 10 |
| Slovakia | R1a1a7* | 16 | 12 | 13 | 16 | 25 | 10 | 11 | 13 | 11 | 10 |
| Slovakia | R1a1a7* | 16 | 12 | 13 | 16 | 25 | 10 | 11 | 13 | 11 | 10 |
| Slovakia | R1a1a7* | 16 | 12 | 13 | 16 | 26 | 10 | 11 | 13 | 11 | 10 |
| Slovakia | R1a1a7* | 16 | 12 | 13 | 16 | 26 | 10 | 11 | 13 | 11 | 10 |
| Slovakia | R1a1a7* | 16 | 12 | 13 | 17 | 24 | 10 | 11 | 13 | 12 | 10 |
| Slovakia | R1a1a7* | 16 | 12 | 13 | 17 | 25 | 10 | 11 | 13 | 11 | 10 |

|          |         |    |    |    |    |    |    |    |    |    |    |
|----------|---------|----|----|----|----|----|----|----|----|----|----|
| Slovakia | R1a1a7* | 16 | 12 | 13 | 17 | 25 | 11 | 11 | 13 | 11 | 10 |
| Slovakia | R1a1a7* | 16 | 12 | 14 | 17 | 25 | 10 | 11 | 13 | 11 | 10 |
| Slovakia | R1a1a7* | 16 | 12 | 13 | 16 | 25 | 10 | 11 | 12 | 11 | 10 |
| Slovakia | R1a1a7* | 17 | 12 | 12 | 17 | 25 | 10 | 11 | 13 | 12 | 10 |
| Slovakia | R1a1a7* | 17 | 12 | 13 | 17 | 25 | 10 | 11 | 13 | 10 | 10 |
| Slovakia | R1a1a7* | 17 | 12 | 13 | 17 | 24 | 11 | 11 | 13 | 10 | 10 |
| Slovakia | R1a1a7* | 17 | 12 | 13 | 17 | 25 | 10 | 11 | 13 | 11 | 10 |
| Slovakia | R1a1a7* | 17 | 12 | 13 | 19 | 25 | 10 | 11 | 13 | 11 | 10 |
| Slovakia | R1a1a7* | 17 | 12 | 13 | 16 | 25 | 10 | 11 | 12 | 10 | 10 |
| Slovakia | R1a1a7* | 17 | 12 | 13 | 17 | 25 | 10 | 11 | 13 | 10 | 11 |
| Slovakia | R1a1a7* | 17 | 12 | 14 | 17 | 25 | 10 | 11 | 13 | 11 | 10 |
| Slovakia | R1a1a7* | 17 | 12 | 14 | 17 | 25 | 10 | 11 | 13 | 10 | 10 |
| Slovakia | R1a1a7* | 17 | 12 | 13 | 17 | 25 | 10 | 11 | 13 | 10 | 10 |
| Slovakia | R1a1a7* | 17 | 12 | 13 | 17 | 25 | 10 | 11 | 13 | 10 | 10 |
| Slovakia | R1a1a7* | 17 | 12 | 13 | 17 | 24 | 10 | 11 | 13 | 11 | 10 |
| Slovakia | R1a1a7* | 17 | 12 | 14 | 16 | 24 | 10 | 11 | 13 | 10 | 10 |
| Slovakia | R1a1a7* | 17 | 12 | 13 | 17 | 24 | 10 | 11 | 13 | 10 | 10 |
| Slovakia | R1a1a7* | 17 | 12 | 14 | 17 | 24 | 10 | 11 | 13 | 10 | 10 |
| Slovakia | R1a1a7* | 17 | 12 | 14 | 17 | 24 | 10 | 11 | 13 | 10 | 10 |
| Slovakia | R1a1a7* | 17 | 12 | 13 | 17 | 23 | 10 | 11 | 13 | 10 | 10 |
| Slovakia | R1a1a7* | 17 | 12 | 13 | 17 | 25 | 10 | 11 | 12 | 10 | 10 |
| Slovakia | R1a1a7* | 17 | 12 | 13 | 17 | 26 | 10 | 11 | 14 | 11 | 10 |
| Slovakia | R1a1a7* | 17 | 12 | 13 | 17 | 24 | 10 | 11 | 13 | 10 | 10 |
| Slovakia | R1a1a7* | 17 | 12 | 13 | 18 | 24 | 10 | 11 | 13 | 10 | 10 |
| Slovakia | R1a1a7* | 18 | 12 | 13 | 17 | 24 | 10 | 11 | 13 | 10 | 10 |
| Slovakia | R1a1a7* | 16 | 12 | 13 | 17 | 24 | 10 | 11 | 13 | 11 | 10 |
| Slovakia | R1a1a7* | 16 | 12 | 13 | 17 | 24 | 10 | 11 | 13 | 10 | 9  |
| Slovakia | R1a1a7* | 15 | 12 | 13 | 16 | 25 | 10 | 11 | 13 | 11 | 10 |
| Slovenia | R1a1a7* | 17 | 12 | 13 | 17 | 26 | 10 | 11 | 14 | 10 | 10 |
| Slovenia | R1a1a7* | 16 | 12 | 13 | 16 | 25 | 10 | 11 | 13 | 11 | 10 |
| Slovenia | R1a1a7* | 17 | 12 | 13 | 17 | 24 | 10 | 11 | 13 | 12 | 10 |
| Turkey   | R1a1a7* | 16 | 12 | 13 | 16 | 26 | 10 | 11 | 13 | 11 | 10 |
| Turkey   | R1a1a7* | 16 | 12 | 13 | 16 | 25 | 10 | 11 | 13 | 11 | 10 |
| Turkey   | R1a1a7* | 16 | 11 | 13 | 15 | 25 | 10 | 11 | 13 | 11 | 10 |

|         |         |    |    |    |    |    |    |    |    |    |    |
|---------|---------|----|----|----|----|----|----|----|----|----|----|
| Ukraine | R1a1a7* | 16 | 12 | 13 | 16 | 25 | 10 | 11 | 13 | 11 | 10 |
| Ukraine | R1a1a7* | 17 | 12 | 13 | 17 | 25 | 10 | 11 | 13 | 10 | 11 |
| Ukraine | R1a1a7* | 15 | 12 | 13 | 16 | 25 | 10 | 11 | 13 | 11 | 10 |
| Ukraine | R1a1a7* | 17 | 12 | 14 | 17 | 25 | 10 | 11 | 13 | 10 | 10 |
| Ukraine | R1a1a7* | 16 | 12 | 13 | 16 | 25 | 10 | 11 | 13 | 11 | 10 |
| Ukraine | R1a1a7* | 16 | 12 | 13 | 16 | 25 | 10 | 11 | 13 | 11 | 10 |
| Ukraine | R1a1a7* | 16 | 12 | 13 | 16 | 25 | 10 | 11 | 13 | 11 | 10 |
| Vepsa   | R1a1a7* | 16 | 12 | 13 | 16 | 26 | 10 | 11 | 13 | 11 | 10 |
| Vepsa   | R1a1a7* | 16 | 12 | 13 | 16 | 25 | 10 | 11 | 13 | 11 | 10 |
| Vepsa   | R1a1a7* | 16 | 12 | 13 | 17 | 25 | 10 | 11 | 13 | 11 | 10 |
| Vepsa   | R1a1a7* | 16 | 12 | 13 | 16 | 25 | 10 | 11 | 13 | 11 | 10 |
| Vepsa   | R1a1a7* | 16 | 12 | 13 | 16 | 25 | 10 | 11 | 13 | 12 | 10 |
| Vepsa   | R1a1a7* | 15 | 12 | 13 | 16 | 25 | 10 | 11 | 13 | 11 | 10 |

**Table S 7**

| Population     | Haplogroup | DYS19 | DYS388 | DYS389I | DYS389B | DYS390 | DYS391 | DYS392 | DYS393 | DYS439 | DYS461 | DYS385 |
|----------------|------------|-------|--------|---------|---------|--------|--------|--------|--------|--------|--------|--------|
| Austria        | R1a1a*     | 16    | 12     | 14      | 17      | 25     | 11     | 11     | 13     | 10     | 10     | 11-14  |
| Austria        | R1a1a*     | 16    | 12     | 13      | 16      | 25     | 10     | 11     | 13     | 10     | 10     | 11-15  |
| Austria        | R1a1a*     | 16    | 12     | 14      | 17      | 25     | 10     | 11     | 13     | 10     | 10     | 11-14  |
| Austria        | R1a1a*     | 16    | 12     | 13      | 17      | 25     | 10     | 11     | 13     | 10     | 10     | 11-14  |
| Belarus        | R1a1a*     | 16    | 12     | 13      | 17      | 25     | 11     | 11     | 13     | 11     | 10     | 11-14  |
| Belarus        | R1a1a*     | 15    | 12     | 13      | 17      | 26     | 11     | 11     | 13     | 10     | 10     | 11-14  |
| Czech Republic | R1a1a*     | 16    | 12     | 14      | 17      | 25     | 11     | 11     | 13     | 10     | 10     | 11-15  |
| Czech Republic | R1a1a*     | 15    | 12     | 12      | 17      | 24     | 11     | 11     | 13     | 10     | 9      | 11-14  |
| Czech Republic | R1a1a*     | 15    | 12     | 14      | 17      | 25     | 11     | 11     | 13     | 10     | 10     | 11-14  |
| Denmark        | R1a1a*     | 16    | 12     | 13      | 17      | 26     | 10     | 11     | 13     | 10     | 11     | 11-14  |
| Denmark        | R1a1a*     | 15    | 12     | 13      | 16      | 26     | 11     | 11     | 13     | 11     | 10     | 11-15  |
| Denmark        | R1a1a*     | 15    | 12     | 13      | 16      | 24     | 10     | 11     | 13     | 10     | 10     | 11-14  |
| Denmark        | R1a1a*     | 16    | 12     | 13      | 17      | 25     | 11     | 11     | 13     | 10     | 11     | 11-14  |
| Denmark        | R1a1a*     | 15    | 12     | 13      | 17      | 24     | 11     | 11     | 13     | 10     | 10     | 11-14  |
| Denmark        | R1a1a*     | 15    | 12     | 14      | 17      | 24     | 11     | 11     | 13     | 10     | 10     | 11-14  |
| Denmark        | R1a1a*     | 15    | 12     | 13      | 17      | 25     | 10     | 11     | 13     | 10     | 10     | 11-15  |
| Denmark        | R1a1a*     | 15    | 12     | 14      | 17      | 24     | 11     | 11     | 13     | 10     | 10     | 11-14  |
| Denmark        | R1a1a*     | 17    | 12     | 13      | 17      | 25     | 11     | 11     | 13     | 11     | 11     | 11-13  |
| Denmark        | R1a1a*     | 15    | 12     | 13      | 17      | 24     | 10     | 11     | 13     | 10     | 10     | 11-15  |
| Denmark        | R1a1a*     | 15    | 12     | 14      | 17      | 26     | 10     | 11     | 13     | 10     | 11     | 11-14  |
| Denmark        | R1a1a*     | 16    | 12     | 13      | 17      | 25     | 11     | 11     | 13     | 10     | 11     | 11-14  |
| England        | R1a1a*     | 15    | 12     | 14      | 17      | 25     | 10     | 11     | 13     | 10     | 10     | 10-14  |
| France         | R1a1a*     | 15    | 12     | 13      | 17      | 25     | 11     | 11     | 13     | 10     | 10     | 10-14  |
| Germany        | R1a1a*     | 15    | 12     | 14      | 17      | 25     | 11     | 11     | 13     | 11     | 10     | 11-15  |
| Germany        | R1a1a*     | 16    | 12     | 13      | 17      | 25     | 10     | 11     | 14     | 10     | 10     | 11-14  |
| Germany        | R1a1a*     | 15    | 12     | 13      | 17      | 24     | 10     | 11     | 13     | 10     | 10     | 11-14  |
| Germany        | R1a1a*     | 17    | 12     | 14      | 18      | 25     | 11     | 11     | 13     | 11     | 10     | 11-14  |
| Germany        | R1a1a*     | 17    | 12     | 13      | 17      | 25     | 11     | 11     | 13     | 11     | 10     | 11-15  |
| Germany        | R1a1a*     | 15    | 12     | 13      | 17      | 25     | 10     | 11     | 13     | 10     | 10     | 10-14  |
| Germany        | R1a1a*     | 16    | 12     | 13      | 17      | 25     | 11     | 11     | 13     | 11     | 10     | 11-15  |
| Germany        | R1a1a*     | 17    | 12     | 13      | 17      | 24     | 10     | 11     | 13     | 11     | 10     | 11-14  |
| Germany        | R1a1a*     | 16    | 12     | 13      | 17      | 25     | 11     | 11     | 13     | 11     | 10     | 11-14  |

|         |        |    |    |    |    |    |    |    |    |    |          |
|---------|--------|----|----|----|----|----|----|----|----|----|----------|
| Germany | R1a1a* | 16 | 12 | 12 | 17 | 25 | 11 | 11 | 13 | 12 | 10 11-15 |
| Germany | R1a1a* | 16 | 12 | 13 | 17 | 25 | 10 | 11 | 13 | 11 | 10 11-14 |
| Germany | R1a1a* | 15 | 10 | 13 | 17 | 25 | 10 | 11 | 13 | 10 | 10 11-15 |
| Germany | R1a1a* | 16 | 12 | 13 | 17 | 24 | 10 | 11 | 13 | 11 | 10 11-14 |
| Germany | R1a1a* | 16 | 12 | 12 | 18 | 25 | 10 | 11 | 13 | 10 | 10 11-15 |
| Germany | R1a1a* | 18 | 12 | 13 | 18 | 25 | 11 | 11 | 13 | 10 | 10 11-13 |
| Germany | R1a1a* | 17 | 12 | 13 | 17 | 25 | 11 | 11 | 13 | 11 | 11 11-13 |
| Germany | R1a1a* | 17 | 12 | 13 | 18 | 25 | 11 | 11 | 13 | 10 | 10 11-14 |
| Germany | R1a1a* | 16 | 12 | 13 | 17 | 25 | 10 | 11 | 13 | 10 | 10 11-14 |
| Germany | R1a1a* | 15 | 12 | 13 | 18 | 25 | 11 | 11 | 14 | 10 | 10 11-14 |
| Germany | R1a1a* | 17 | 12 | 14 | 17 | 25 | 11 | 11 | 13 | 11 | 10 11-14 |
| Germany | R1a1a* | 15 | 13 | 13 | 18 | 24 | 11 | 11 | 13 | 10 | 10 11-14 |
| Germany | R1a1a* | 15 | 12 | 13 | 17 | 25 | 11 | 11 | 13 | 10 | 10 11-14 |
| Germany | R1a1a* | 15 | 12 | 13 | 17 | 25 | 10 | 11 | 13 | 10 | 10 11-14 |
| Germany | R1a1a* | 17 | 12 | 13 | 17 | 25 | 11 | 11 | 13 | 11 | 10 10-14 |
| Germany | R1a1a* | 16 | 12 | 13 | 17 | 25 | 11 | 11 | 13 | 10 | 11 11-15 |
| Germany | R1a1a* | 16 | 12 | 13 | 15 | 25 | 11 | 11 | 13 | 10 | 10 11-14 |
| Germany | R1a1a* | 17 | 12 | 13 | 17 | 25 | 10 | 11 | 13 | 10 | 10 11-14 |
| Greece  | R1a1a* | 15 | 12 | 13 | 18 | 25 | 11 | 11 | 13 | 10 | 9 11-15  |
| Ireland | R1a1a* | 15 | 12 | 13 | 17 | 25 | 10 | 11 | 13 | 10 | 10 11-14 |
| Ireland | R1a1a* | 15 | 10 | 14 | 17 | 25 | 10 | 11 | 13 | 10 | 10 11-14 |
| Ireland | R1a1a* | 17 | 12 | 13 | 18 | 25 | 11 | 11 | 13 | 10 | 10 11-14 |
| Italy   | R1a1a* | 16 | 12 | 14 | 17 | 25 | 10 | 11 | 14 | 10 | 10 10-14 |
| Italy   | R1a1a* | 15 | 12 | 13 | 16 | 25 | 10 | 11 | 13 | 11 | 10 11-16 |
| Italy   | R1a1a* | 16 | 12 | 12 | 18 | 25 | 11 | 11 | 13 | 10 | 10 11-15 |
| Italy   | R1a1a* | 16 | 12 | 14 | 17 | 25 | 10 | 11 | 13 | 10 | 10 11-14 |
| Italy   | R1a1a* | 17 | 12 | 13 | 18 | 25 | 11 | 11 | 14 | 10 | 10 11-14 |
| Italy   | R1a1a* | 16 | 12 | 13 | 17 | 25 | 10 | 11 | 13 | 11 | 11 11-13 |
| Italy   | R1a1a* | 16 | 12 | 13 | 18 | 25 | 10 | 11 | 13 | 10 | 10 11-11 |
| Italy   | R1a1a* | 15 | 12 | 13 | 17 | 25 | 11 | 11 | 14 | 10 | 11 11-14 |
| Italy   | R1a1a* | 17 | 12 | 13 | 18 | 25 | 11 | 11 | 13 | 10 | 10 11-16 |
| Italy   | R1a1a* | 16 | 12 | 13 | 17 | 25 | 10 | 11 | 13 | 10 | 10 11-14 |
| Italy   | R1a1a* | 16 | 12 | 13 | 17 | 25 | 10 | 11 | 13 | 10 | 10 11-14 |
| Italy   | R1a1a* | 16 | 12 | 13 | 17 | 25 | 10 | 11 | 13 | 11 | 10 11-14 |





|            |        |    |    |    |    |    |    |    |    |    |          |
|------------|--------|----|----|----|----|----|----|----|----|----|----------|
| Kyrgyzstan | R1a1a* | 15 | 12 | 14 | 18 | 25 | 11 | 11 | 13 | 10 | 10 11-14 |
| Kyrgyzstan | R1a1a* | 16 |    |    |    |    |    |    | 13 |    | 10       |
| Kyrgyzstan | R1a1a* | 16 | 12 | 15 | 17 | 25 | 10 | 11 | 13 | 10 | 10 11-14 |
| Kyrgyzstan | R1a1a* | 16 |    |    |    |    |    |    | 13 |    | 10       |
| Kyrgyzstan | R1a1a* | 16 | 12 | 13 | 18 | 25 | 11 | 11 | 13 | 10 | 10 11-14 |
| Kyrgyzstan | R1a1a* | 16 | 12 | 13 | 16 | 25 | 11 | 11 | 13 | 10 | 10 11-14 |
| Kyrgyzstan | R1a1a* | 16 | 12 | 14 | 17 | 24 | 11 | 11 | 13 | 10 | 10 11-14 |
| Kyrgyzstan | R1a1a* | 17 | 12 | 13 | 18 | 25 | 11 | 11 | 13 | 10 | 10 11-14 |
| Kyrgyzstan | R1a1a* | 16 | 12 | 13 | 18 | 25 | 11 | 11 | 13 | 10 | 10 11-14 |
| Kyrgyzstan | R1a1a* | 16 | 12 | 13 | 18 | 24 | 11 | 11 | 13 | 10 | 10 11-14 |
| Kyrgyzstan | R1a1a* | 16 | 12 | 14 | 18 | 24 | 11 | 11 | 13 | 10 | 10 11-14 |
| Kyrgyzstan | R1a1a* | 16 |    |    |    |    |    |    | 13 |    | 10       |
| Kyrgyzstan | R1a1a* | 16 | 12 | 14 | 18 | 25 | 10 | 11 | 13 | 10 | 10 11-14 |
| Kyrgyzstan | R1a1a* | 16 | 12 | 14 | 17 | 25 | 11 | 11 | 13 | 10 | 10 11-14 |
| Kyrgyzstan | R1a1a* | 16 | 12 | 14 | 18 | 25 | 11 | 11 | 13 | 11 | 10 11-14 |
| Kyrgyzstan | R1a1a* | 16 | 12 | 13 | 18 | 25 | 11 | 11 | 13 | 10 | 10 11-14 |
| Kyrgyzstan | R1a1a* | 16 | 12 | 14 | 17 | 25 | 11 | 11 | 13 | 10 | 10 11-14 |
| Kyrgyzstan | R1a1a* | 16 | 12 | 13 | 18 | 24 | 11 | 11 | 13 | 10 | 10 11-14 |
| Kyrgyzstan | R1a1a* | 16 | 12 | 14 | 18 | 25 | 11 | 11 | 13 | 10 | 10 11-14 |
| Kyrgyzstan | R1a1a* | 16 | 12 | 14 | 17 | 25 | 11 | 11 | 13 | 10 | 10 11-14 |
| Kyrgyzstan | R1a1a* | 16 | 12 | 14 | 18 | 25 | 11 | 11 | 13 | 10 | 10 11-14 |
| Kyrgyzstan | R1a1a* | 16 | 12 | 13 | 17 | 25 | 10 | 11 | 13 | 10 | 10 11-14 |
| Kyrgyzstan | R1a1a* | 16 | 12 | 13 | 18 | 25 | 11 | 11 | 13 | 10 | 10 11-14 |
| Kyrgyzstan | R1a1a* | 16 | 12 | 13 | 18 | 26 | 11 | 11 | 13 | 10 | 10 11-14 |
| Kyrgyzstan | R1a1a* | 16 | 12 | 14 | 18 | 25 | 11 | 11 | 13 | 10 | 10 11-14 |
| Kyrgyzstan | R1a1a* | 16 |    |    |    |    |    |    | 13 |    | 10       |
| Kyrgyzstan | R1a1a* | 16 | 12 | 14 | 18 | 25 | 12 | 11 | 13 | 10 | 10 11-14 |
| Kyrgyzstan | R1a1a* | 16 | 12 | 14 | 18 | 25 | 11 | 11 | 12 | 10 | 10 11-14 |
| Kyrgyzstan | R1a1a* | 16 |    |    |    |    |    |    | 13 |    | 10       |
| Kyrgyzstan | R1a1a* | 16 | 12 | 14 | 18 | 25 | 11 | 11 | 13 | 10 | 10 11-14 |
| Kyrgyzstan | R1a1a* | 16 | 12 | 14 | 18 | 25 | 10 | 11 | 13 | 10 | 10 11-14 |
| Kyrgyzstan | R1a1a* | 17 | 12 | 14 | 18 | 25 | 11 | 11 | 13 | 10 | 10 11-14 |
| Kyrgyzstan | R1a1a* | 16 |    |    |    |    |    |    | 13 |    | 10       |
| Kyrgyzstan | R1a1a* | 16 | 12 | 14 | 18 | 25 | 11 | 11 | 13 | 10 | 10 11-14 |

|             |        |    |    |    |    |    |    |    |    |    |          |
|-------------|--------|----|----|----|----|----|----|----|----|----|----------|
| Kyrgyzstan  | R1a1a* | 16 | 12 | 13 | 18 | 24 | 11 | 11 | 13 | 10 | 10 11-14 |
| Kyrgyzstan  | R1a1a* | 16 | 12 | 13 | 18 | 24 | 10 | 11 | 13 | 10 | 10 11-14 |
| Kyrgyzstan  | R1a1a* | 16 | 12 | 14 | 18 | 25 | 11 | 11 | 13 | 10 | 10 11-14 |
| Kyrgyzstan  | R1a1a* | 16 | 12 | 13 | 17 | 25 | 10 | 12 | 13 | 10 | 10 11-15 |
| Kyrgyzstan  | R1a1a* | 16 | 12 | 13 | 18 | 25 | 11 | 11 | 13 | 10 | 10 11-13 |
| Kyrgyzstan  | R1a1a* | 16 | 12 | 13 | 17 | 24 | 11 | 11 | 13 | 10 | 10 11-14 |
| Kyrgyzstan  | R1a1a* | 16 | 12 | 14 | 18 | 25 | 11 | 11 | 13 | 10 | 10 11-14 |
| Kyrgyzstan  | R1a1a* | 16 |    |    |    |    |    |    | 13 |    | 10       |
| Kyrgyzstan  | R1a1a* | 16 | 12 | 13 | 18 | 25 | 11 | 11 | 13 | 10 | 10 11-14 |
| Kyrgyzstan  | R1a1a* | 17 | 12 | 13 | 18 | 23 | 11 | 11 | 13 | 10 | 10 11-14 |
| Kyrgyzstan  | R1a1a* | 16 | 12 | 13 | 18 | 25 | 11 | 11 | 13 | 10 | 10 11-14 |
| Kyrgyzstan  | R1a1a* | 16 |    |    |    |    |    |    | 13 |    | 10       |
| Netherlands | R1a1a* | 15 | 7  | 13 | 17 | 25 | 10 | 11 | 13 | 10 | 10 11-14 |
| Netherlands | R1a1a* | 15 |    |    |    |    |    |    | 13 |    | 10       |
| Netherlands | R1a1a* | 16 | 10 | 13 | 18 | 25 | 10 | 11 | 13 | 10 | 10 11-14 |
| Poland      | R1a1a* | 15 | 12 | 13 | 17 | 24 | 11 | 11 | 13 | 10 | 10 11-14 |
| Poland      | R1a1a* | 17 | 12 | 13 | 17 | 25 | 11 | 11 | 11 | 10 | 10 11-14 |
| Poland      | R1a1a* | 16 | 12 | 13 | 18 | 25 | 11 | 11 | 13 | 10 | 10 11-14 |
| Poland      | R1a1a* | 15 | 12 | 13 | 16 | 25 | 10 | 11 | 13 | 11 | 10 11-16 |
| Poland      | R1a1a* | 15 | 12 | 13 | 17 | 25 | 11 | 11 | 13 | 10 | 10 11-14 |
| Poland      | R1a1a* | 17 | 12 | 13 | 16 | 26 | 11 | 11 | 13 | 11 | 11 11-13 |
| Poland      | R1a1a* | 16 | 12 | 13 | 17 | 25 | 10 | 11 | 13 | 10 | 10 11-14 |
| Poland      | R1a1a* | 17 | 12 | 13 | 17 | 25 | 11 | 11 | 13 | 11 | 10 11-15 |
| Poland      | R1a1a* | 17 | 12 | 13 | 16 | 25 | 10 | 11 | 13 | 10 | 10 11-14 |
| Poland      | R1a1a* | 15 | 12 | 13 | 17 | 25 | 11 | 11 | 13 | 10 | 10 11-14 |
| Poland      | R1a1a* | 16 | 12 | 13 | 17 | 25 | 10 | 11 | 13 | 10 | 10 11-14 |
| Poland      | R1a1a* | 17 | 12 | 13 | 17 | 27 | 11 | 11 | 13 | 11 | 11 11-13 |
| Poland      | R1a1a* | 15 | 12 | 13 | 18 | 25 | 11 | 11 | 13 | 10 | 10 11-14 |
| Poland      | R1a1a* | 17 | 12 | 13 | 18 | 25 | 10 | 11 | 13 | 10 | 10 11-14 |
| Poland      | R1a1a* | 16 | 12 | 13 | 17 | 25 | 10 | 11 | 13 | 10 | 10 11-14 |
| Poland      | R1a1a* | 17 | 12 | 13 | 16 | 25 | 11 | 11 | 13 | 10 | 10 11-14 |
| Poland      | R1a1a* | 16 | 12 | 13 | 17 | 25 | 11 | 11 | 13 | 11 | 10 11-14 |
| Poland      | R1a1a* | 16 | 12 | 14 | 14 | 25 | 10 | 11 | 13 | 10 | 10 11-14 |
| Poland      | R1a1a* | 17 | 12 | 13 | 18 | 25 | 11 | 11 | 13 | 11 | 10 11-14 |

|          |        |    |    |    |       |    |    |    |    |    |          |
|----------|--------|----|----|----|-------|----|----|----|----|----|----------|
| Poland   | R1a1a* | 15 | 12 | 13 | 18    | 25 | 11 | 11 | 13 | 10 | 10 11-14 |
| Poland   | R1a1a* | 15 | 12 | 13 | 17    | 24 | 10 | 11 | 13 | 10 | 10 11-14 |
| Russia   | R1a1a* | 14 | 12 | 14 | 17    | 25 | 11 | 11 | 13 | 10 | 11 11-15 |
| Russia   | R1a1a* | 12 | 12 | 13 | 16    | 25 | 11 | 11 | 13 | 10 | 10 12-15 |
| Russia   | R1a1a* | 16 | 12 | 13 | 17    | 25 | 11 | 11 | 13 | 10 | 10 11-14 |
| Russia   | R1a1a* | 16 | 12 | 13 | 17    | 26 | 11 | 11 | 13 | 10 | 11 11-14 |
| Russia   | R1a1a* | 15 | 12 | 13 | 17    | 25 | 10 | 11 | 13 | 10 | 10 11-15 |
| Russia   | R1a1a* | 16 | 12 | 13 | 17    | 25 | 11 | 11 | 13 | 10 | 10 11-14 |
| Russia   | R1a1a* | 16 | 12 | 13 | 17    | 25 | 11 | 11 | 13 | 10 | 11 11-14 |
| Russia   | R1a1a* | 15 | 12 | 13 | 18    | 24 | 11 | 11 | 14 | 10 | 10 11-15 |
| Russia   | R1a1a* | 14 | 12 | 13 | 16    | 25 | 11 | 11 | 13 | 10 | 10 11-14 |
| Slovakia | R1a1a* | 16 | 12 | 13 | 17    | 25 | 11 | 11 | 13 | 11 | 10 11-14 |
| Slovakia | R1a1a* | 18 | 12 | 13 | 16    | 24 | 12 | 11 | 13 | 10 | 10 11-14 |
| Slovakia | R1a1a* | 16 | 13 | 13 | 17    | 25 | 12 | 11 | 13 | 10 | 10 11-14 |
| Slovenia | R1a1a* | 16 | 12 | 13 | 16    | 26 | 11 | 11 | 13 | 10 | 10 11-14 |
| Slovenia | R1a1a* | 17 | 12 | 13 | 17    | 25 | 10 | 11 | 13 | 10 | 10 12-14 |
| Slovenia | R1a1a* | 16 | 12 | 14 | 17    | 25 | 11 | 11 | 13 | 10 | 10 11-14 |
| Slovenia | R1a1a* | 16 | 12 | 14 | 17    | 25 | 11 | 11 | 13 | 10 | 10 11-14 |
| Slovenia | R1a1a* | 16 | 12 | 15 | 18    | 25 | 10 | 11 | 13 | 10 | 10 11-14 |
| Slovenia | R1a1a* | 16 | 12 | 14 | 17    | 25 | 11 | 11 | 13 | 10 | 10 11-14 |
| Slovenia | R1a1a* | 16 | 12 | 12 | 17    | 25 | 10 | 11 | 13 | 10 | 10 11-14 |
| Slovenia | R1a1a* | 16 | 12 | 14 | 17    | 25 | 11 | 11 | 13 | 10 | 10 11-14 |
| Slovenia | R1a1a* | 16 | 12 | 13 | 16    | 25 | 10 | 11 | 13 | 10 | 10 11-14 |
| Slovenia | R1a1a* | 16 | 12 | 14 | 17    | 24 | 11 | 11 | 13 | 10 | 10 11-11 |
| Slovenia | R1a1a* | 16 | 12 | 14 | 17    | 25 | 10 | 11 | 13 | 10 | 10       |
| Slovenia | R1a1a* | 15 | 12 | 14 | 17    | 25 | 11 | 11 | 13 | 11 | 11 11-13 |
| Slovenia | R1a1a* | 16 | 12 | 13 | 17-18 | 25 | 10 | 11 | 13 | 10 | 10 11-14 |
| Slovenia | R1a1a* | 16 | 12 | 13 | 16    | 25 | 11 | 11 | 13 | 11 | 10 11-14 |
| Slovenia | R1a1a* | 15 | 12 | 13 | 16    | 26 | 10 | 11 | 13 | 11 | 10 11-15 |
| Slovenia | R1a1a* | 17 | 12 | 14 | 17    | 24 | 11 | 11 | 13 | 10 | 10 11-14 |
| Slovenia | R1a1a* | 16 | 12 | 14 | 17    | 25 | 11 |    | 13 | 10 | 10 11-14 |
| Slovenia | R1a1a* |    |    |    |       |    |    |    |    |    |          |
| Slovenia | R1a1a* | 16 | 12 | 13 | 18    | 25 | 11 | 11 | 13 | 11 | 11 11-12 |
| Slovenia | R1a1a* | 16 | 12 | 13 | 17    | 24 | 10 | 11 | 13 | 10 | 10 11-14 |

|                |         |    |    |    |    |    |    |    |    |    |          |
|----------------|---------|----|----|----|----|----|----|----|----|----|----------|
| Slovenia       | R1a1a*  | 16 | 12 | 13 | 17 | 25 | 10 | 11 | 13 | 11 | 10 11-14 |
| Slovenia       | R1a1a*  | 16 | 12 | 13 | 17 | 24 | 10 | 11 | 13 | 11 | 10 11-14 |
| Slovenia       | R1a1a*  | 16 | 12 | 13 | 17 | 26 | 10 | 11 | 13 | 11 | 10 12-15 |
| Slovenia       | R1a1a*  | 16 | 12 | 13 | 17 | 25 | 10 | 11 | 12 | 10 | 10 11-14 |
| Slovenia       | R1a1a*  | 15 | 12 | 14 | 17 | 25 | 10 | 11 | 13 | 10 | 10       |
| Slovenia       | R1a1a*  | 16 | 12 | 13 | 17 | 25 | 10 | 11 | 13 | 10 | 10 11-14 |
| Slovenia       | R1a1a*  | 16 | 12 | 13 | 16 | 25 | 10 | 11 | 13 | 10 | 10 11-14 |
| Slovenia       | R1a1a*  | 16 | 12 | 13 | 17 | 25 | 10 | 11 | 13 | 10 | 10 11-14 |
| Slovenia       | R1a1a*  | 16 | 12 | 13 | 17 | 25 | 10 | 11 | 13 | 10 | 10 11-15 |
| Slovenia       | R1a1a*  | 16 | 12 | 13 | 17 | 25 | 10 | 11 | 13 | 10 | 10 11-15 |
| Slovenia       | R1a1a*  | 15 | 12 | 13 | 17 | 24 | 10 | 11 | 13 | 10 | 10 12-14 |
| Slovenia       | R1a1a*  | 16 | 12 | 13 | 17 | 25 | 10 | 11 | 13 | 10 | 10 11-15 |
| Slovenia       | R1a1a*  | 16 | 12 | 13 | 17 | 26 | 10 | 11 | 13 | 10 | 10       |
| Slovenia       | R1a1a*  | 16 | 12 | 13 | 17 | 25 | 10 | 11 | 13 | 10 | 10 11-14 |
| Slovenia       | R1a1a*  | 15 | 12 | 13 | 17 | 25 | 10 | 11 | 13 | 10 | 10 11-14 |
| Switzerland    | R1a1a*  | 15 | 12 | 13 | 17 | 25 | 10 | 11 | 13 | 10 | 10 11-14 |
| Switzerland    | R1a1a*  | 16 | 13 | 13 | 18 | 24 | 11 | 11 | 14 | 10 | 10 11-14 |
| Switzerland    | R1a1a*  | 16 | 12 | 13 | 18 | 25 | 11 | 11 | 14 | 10 | 10 11-14 |
| Ukraine        | R1a1a*  | 18 | 12 | 13 | 17 | 25 | 11 | 11 | 13 | 11 | 10 9-13  |
| Ukraine        | R1a1a*  | 16 | 12 | 13 | 16 | 25 | 11 | 11 | 13 | 10 | 10 11-14 |
| Ukraine        | R1a1a*  | 16 | 12 | 13 | 17 | 25 | 10 | 11 | 13 | 10 | 10 11-14 |
| Austria        | R1a1a7* | 17 | 12 | 14 | 17 | 25 | 10 | 11 | 13 | 10 | 10 10-14 |
| Czech Republic | R1a1a7* | 16 | 12 | 13 | 16 | 25 | 10 | 11 | 13 | 11 | 10 11-14 |
| Czech Republic | R1a1a7* | 16 | 12 | 13 | 16 | 25 | 10 | 11 | 13 | 11 | 10 12-14 |
| Czech Republic | R1a1a7* | 16 | 12 | 13 | 16 | 24 | 10 | 11 | 13 | 11 | 10 11-14 |
| Czech Republic | R1a1a7* | 16 | 12 | 13 | 17 | 25 | 10 | 11 | 13 | 11 | 10 11-14 |
| Czech Republic | R1a1a7* | 17 | 12 | 13 | 17 | 26 | 10 | 11 | 13 | 11 | 10 10-13 |
| Czech Republic | R1a1a7* | 17 | 12 | 13 | 17 | 25 | 10 | 11 | 13 | 10 | 10 10-14 |
| Czech Republic | R1a1a7* | 17 | 12 | 13 | 17 | 25 | 10 | 11 | 14 | 10 | 10 10-14 |
| Denmark        | R1a1a7* | 16 | 12 | 13 | 17 | 25 | 10 | 11 | 13 | 11 | 10 11-14 |
| Germany        | R1a1a7* | 16 | 12 | 13 | 16 | 25 | 10 | 11 | 13 | 11 | 10 11-14 |
| Germany        | R1a1a7* | 16 | 12 | 13 | 17 | 25 | 10 | 11 | 13 | 11 | 10 11-14 |
| Germany        | R1a1a7* | 16 | 12 | 13 | 16 | 26 | 10 | 11 | 13 | 11 | 10 11-14 |
| Germany        | R1a1a7* | 17 | 12 | 13 | 17 | 25 | 10 | 11 | 13 | 10 | 10 10-15 |
| Germany        | R1a1a7* | 16 | 12 | 13 | 16 | 25 | 10 | 11 | 13 | 11 | 10 11-14 |

|             |         |    |    |    |    |    |    |    |    |    |          |
|-------------|---------|----|----|----|----|----|----|----|----|----|----------|
| Germany     | R1a1a7* | 17 | 12 | 13 | 17 | 25 | 11 | 11 | 13 | 10 | 10 10-14 |
| Germany     | R1a1a7* | 17 | 12 | 13 | 17 | 25 | 10 | 11 | 13 | 10 | 10 10-15 |
| Germany     | R1a1a7* | 18 | 12 | 13 | 16 | 25 | 10 | 11 | 13 | 13 | 10 11-14 |
| Germany     | R1a1a7* | 16 | 12 | 14 | 16 | 24 | 10 | 11 | 14 | 11 | 10 11-14 |
| Germany     | R1a1a7* | 16 | 12 | 13 | 16 | 25 | 10 | 11 | 13 | 11 | 10 11-14 |
| Germany     | R1a1a7* | 16 | 12 | 14 | 16 | 25 | 10 | 11 | 13 | 11 | 10 11-14 |
| Germany     | R1a1a7* | 16 | 12 | 13 | 16 | 25 | 10 | 11 | 13 | 11 | 10 11-14 |
| Germany     | R1a1a7* | 16 | 12 | 13 | 16 | 26 | 10 | 11 | 13 | 11 | 10 11-14 |
| Germany     | R1a1a7* | 16 | 12 | 12 | 17 | 25 | 10 | 11 | 13 | 10 | 10 10-14 |
| Germany     | R1a1a7* | 16 | 12 | 12 | 16 | 26 | 10 | 11 | 12 | 11 | 10 11-14 |
| Netherlands | R1a1a7* | 15 | 12 | 13 | 16 | 25 | 10 | 11 | 13 | 11 | 10 11-15 |
| Netherlands | R1a1a7* | 15 | 12 | 13 | 16 | 26 | 10 | 11 | 13 | 11 | 10 11-14 |
| Poland      | R1a1a7* | 16 | 12 | 13 | 16 | 25 | 10 | 11 | 13 | 11 | 10 11-14 |
| Poland      | R1a1a7* | 16 | 12 | 13 | 17 | 25 | 10 | 11 | 13 | 11 | 10 11-14 |
| Poland      | R1a1a7* | 17 | 12 | 13 | 17 | 25 | 10 | 11 | 13 | 10 | 10 10-14 |
| Poland      | R1a1a7* | 17 | 12 | 13 | 17 | 25 | 10 | 11 | 13 | 10 | 10 10-14 |
| Poland      | R1a1a7* | 16 | 12 | 13 | 16 | 26 | 10 | 11 | 13 | 11 | 10 11-14 |
| Poland      | R1a1a7* | 17 | 12 | 13 | 17 | 25 | 12 | 11 | 13 | 10 | 10 10-14 |
| Poland      | R1a1a7* | 15 | 12 | 13 | 16 | 26 | 10 | 11 | 13 | 12 | 10 11-14 |
| Poland      | R1a1a7* | 17 | 12 | 13 | 17 | 25 | 10 | 10 | 13 | 10 | 10 10-14 |
| Poland      | R1a1a7* | 17 | 12 | 12 | 17 | 24 | 10 | 11 | 13 | 10 | 10 10-14 |
| Poland      | R1a1a7* | 15 | 12 | 13 | 16 | 24 | 10 | 11 | 13 | 11 | 10 11-14 |
| Poland      | R1a1a7* | 17 | 12 | 13 | 17 | 25 | 10 | 11 | 13 | 11 | 10 10-13 |
| Poland      | R1a1a7* | 17 | 12 | 13 | 16 | 24 | 10 | 11 | 13 | 10 | 10 10-14 |
| Poland      | R1a1a7* | 16 | 12 | 13 | 16 | 25 | 10 | 11 | 13 | 11 | 10 11-14 |
| Poland      | R1a1a7* | 15 | 12 | 14 | 17 | 25 | 10 | 11 | 13 | 11 | 10 11-15 |
| Poland      | R1a1a7* | 18 | 12 | 13 | 17 | 26 | 10 | 11 | 13 | 10 | 10 10-14 |
| Poland      | R1a1a7* | 17 | 12 | 13 | 17 | 26 | 10 | 11 | 13 | 10 | 11 10-14 |
| Poland      | R1a1a7* | 16 | 12 | 13 | 17 | 25 | 10 | 11 | 13 | 12 | 10 11-14 |
| Poland      | R1a1a7* | 17 | 12 | 13 | 17 | 25 | 10 | 11 | 13 | 10 | 10 9-16  |
| Poland      | R1a1a7* | 16 | 12 | 13 | 17 | 25 | 10 | 11 | 13 | 12 | 10 11-14 |
| Poland      | R1a1a7* | 16 | 12 | 13 | 16 | 25 | 10 | 11 | 13 | 11 | 10 11-14 |
| Poland      | R1a1a7* | 15 | 12 | 13 | 16 | 26 | 10 | 11 | 13 | 11 | 10 11-14 |
| Poland      | R1a1a7* | 17 | 12 | 13 | 17 | 25 | 10 | 11 | 13 | 12 | 10 10-14 |

|          |         |    |    |    |    |    |    |    |    |    |          |
|----------|---------|----|----|----|----|----|----|----|----|----|----------|
| Poland   | R1a1a7* | 17 | 12 | 13 | 17 | 25 | 10 | 11 | 13 | 10 | 10 10-14 |
| Poland   | R1a1a7* | 17 | 12 | 13 | 17 | 25 | 10 | 11 | 13 | 10 | 11 10-14 |
| Poland   | R1a1a7* | 17 | 12 | 13 | 17 | 25 | 10 | 11 | 13 | 10 | 10 10-14 |
| Poland   | R1a1a7* | 17 | 12 | 14 | 17 | 25 | 10 | 11 | 13 | 10 | 10 10-13 |
| Poland   | R1a1a7* | 17 | 12 | 13 | 18 | 25 | 10 | 11 | 13 | 10 | 10 10-14 |
| Poland   | R1a1a7* | 17 | 12 | 13 | 19 | 25 | 10 | 11 | 13 | 10 | 10 10-13 |
| Poland   | R1a1a7* | 17 | 12 | 13 | 17 | 25 | 10 | 11 | 13 | 10 | 10 10-14 |
| Russia   | R1a1a7* | 15 | 12 | 13 | 16 | 25 | 10 | 11 | 13 | 11 | 10 12-14 |
| Russia   | R1a1a7* | 16 | 12 | 14 | 16 | 25 | 10 | 11 | 13 | 11 | 10 11-14 |
| Russia   | R1a1a7* | 16 | 12 | 13 | 16 | 24 | 10 | 11 | 13 | 11 | 10 11-14 |
| Russia   | R1a1a7* | 17 | 12 | 13 | 16 | 25 | 10 | 11 | 14 | 11 | 10 11-14 |
| Russia   | R1a1a7* | 17 | 12 | 13 | 16 | 25 | 10 | 11 | 13 | 10 | 10 10-14 |
| Slovakia | R1a1a7* | 16 | 12 | 13 | 17 | 24 | 10 | 11 | 13 | 10 | 9 10-14  |
| Slovakia | R1a1a7* | 15 | 12 | 13 | 16 | 25 | 10 | 11 | 13 | 11 | 10 11-14 |
| Slovakia | R1a1a7* | 16 | 12 | 13 | 17 | 24 | 10 | 11 | 13 | 11 | 10 11-14 |
| Slovenia | R1a1a7* | 17 | 12 | 13 | 17 | 26 | 10 | 11 | 14 | 10 | 10 10-14 |
| Slovenia | R1a1a7* |    |    |    |    |    |    |    |    |    |          |
| Slovenia | R1a1a7* | 16 | 12 | 13 | 16 | 25 | 10 | 11 | 13 | 11 | 10 11-14 |
| Slovenia | R1a1a7* | 17 | 12 | 13 | 17 | 24 | 10 | 11 | 13 | 12 | 10 10-14 |
| Ukraine  | R1a1a7* | 16 | 12 | 13 | 16 | 25 | 10 | 11 | 13 | 11 | 10 11-14 |
| Ukraine  | R1a1a7* | 16 | 12 | 13 | 16 | 25 | 10 | 11 | 13 | 11 | 10 11-14 |

| DYS426 | DYS437 | DYS438 | DYS441 | DYS442 | DYS444 | DYS445 | DYS446 | DYS447 | DYS448 | DYS449 | DYS452 | DYS454 | DYS455 |
|--------|--------|--------|--------|--------|--------|--------|--------|--------|--------|--------|--------|--------|--------|
| 12     | 14     | 11     | 14     | 17     | 15     | 12     | 13     | 24     | 19     | 31     | 30     | 11     | 11     |
| 12     | 14     | 11     | 14     | 19     | 14     | 12     | 12     | 24     | 20     | 30     | 30     | 11     | 11     |
| 12     | 14     | 11     | 14     | 19     | 14     | 12     | 12     | 24     | 20     | 31     | 30     | 11     | 11     |
| 12     | 14     | 11     | 14     | 19     | 14     | 12     | 12     | 24     | 20     | 30     | 30     | 11     | 11     |
| 12     | 14     | 11     | 14     | 18     | 13     | 12     | 14     | 24     | 20     | 32     | 30     | 11     | 11     |
| 12     | 14     | 11     | 14     | 17     | 14     | 12     | 12     | 21     | 21     | 34     | 29     | 11     | 11     |
| 12     | 14     | 11     | 14     | 16     | 14     | 12     | 12     | 23     | 20     | 32     | 30     | 11     | 11     |
| 12     | 14     | 11     | 14     | 18     |        | 12     |        |        |        | 35     | 30     | 11     | 11     |
| 12     | 14     | 11     | 14     | 17     | 14     | 12     | 12     | 24     | 20     | 32     | 30     | 11     | 11     |
| 12     | 14     | 11     | 14     | 17     | 14     | 12     | 14     | 23     | 20     | 31     | 30     | 11     | 11     |
| 12     | 14     | 11     | 14     | 19     | 14     | 12     | 13     | 24     | 20     | 31     |        | 11     | 11     |
| 12     | 14     | 11     | 14     | 19     | 14     | 12     | 12     | 23     | 20     | 33     | 30     | 12     | 11     |
| 12     | 14     | 11     | 14     | 17     | 14     | 12     | 12     | 24     | 20     | 32     | 30     | 11     | 11     |
| 12     | 14     | 11     | 14     | 17     | 13     | 13     | 13     | 23     | 20     | 32     | 30     | 11     | 11     |
| 12     | 14     | 11     | 14     | 17     | 14     | 12     | 12     | 23     | 20     | 32     | 30     | 11     | 11     |
| 12     | 14     | 11     | 14     | 17     | 15     | 12     | 12     | 24     | 20     | 32     | 30     | 11     | 11     |
| 12     | 14     | 11     | 14     | 17     | 14     | 12     | 12     | 25     | 20     | 32     | 31     | 11     | 11     |
| 12     | 14     | 11     | 14     | 19     | 13     | 12     | 12     | 24     | 20     | 33     | 30     | 11     | 11     |
| 12     | 14     | 11     | 14     | 18     | 15     | 12     | 12     | 23     | 20     | 32     | 30     | 11     | 11     |
| 12     | 14     | 11     | 14     | 17     | 14     | 12     | 12     | 23     | 20     | 31     | 30     | 11     | 11     |
| 12     | 14     | 11     | 14     | 17     | 14     | 12     | 12     | 24     | 20     | 32     |        | 11     | 11     |
| 12     | 14     | 11     | 14     | 18     | 14     | 12     | 12     | 23     | 20     | 32     |        | 11     | 11     |
| 12     | 14     | 11     | 15     | 17     | 14     | 12     | 12     | 24     | 20     | 35     | 30     | 12     | 11     |
| 12     | 14     | 11     | 14     | 18     | 14     | 12     | 12     | 24     | 20     | 33     | 30     | 11     | 11     |
| 12     | 14     | 11     | 14     | 18     | 14     | 12     | 12     | 24     | 20     | 31     | 28     | 11     | 11     |
| 12     | 14     | 11     | 14     | 19     | 14     | 12     | 13     | 23     | 20     | 34     | 30     | 11     | 11     |
| 12     | 14     | 11     | 14     | 19     | 14     | 12     | 12     | 24     | 20     | 34     | 30     | 11     | 11     |
| 12     | 14     | 11     | 14     | 19     | 13     | 12     | 11     | 24     | 20     | 33     | 30     | 11     | 11     |
| 12     | 14     | 11     | 14     | 17     | 13     | 12     | 12     | 23     | 20     | 32     | 30     | 11     | 11     |
| 12     | 14     | 11     | 14     | 18     | 13     | 12     | 12     | 24     | 20     | 31     | 28     | 11     | 11     |
| 12     | 14     | 11     | 13     | 19     | 14     | 12     | 13     | 24     | 21     | 33     | 29     | 11     | 11     |
| 12     | 14     | 11     | 14     | 19     | 12     | 12     | 12     | 24     | 20     | 31     | 28     | 11     | 11     |



|    |    |    |    |    |    |    |    |    |    |    |    |    |    |
|----|----|----|----|----|----|----|----|----|----|----|----|----|----|
| 12 | 14 | 11 | 14 | 18 | 15 | 12 | 12 | 24 | 20 | 31 | 28 | 11 | 11 |
| 12 | 14 | 11 | 14 | 19 | 13 | 12 | 11 | 24 | 20 | 32 | 28 | 11 | 12 |
| 12 | 14 | 11 | 14 | 18 | 14 | 12 | 12 | 25 | 19 | 31 | 31 | 11 | 11 |
| 12 | 14 | 11 | 14 | 18 | 13 | 12 | 12 | 24 | 20 | 32 | 31 | 11 | 11 |
| 12 | 14 | 11 | 14 | 17 | 14 | 12 | 12 | 24 | 19 | 31 | 29 | 11 | 11 |
| 12 | 14 | 11 | 14 | 19 | 14 | 12 | 12 | 24 | 21 | 32 | 30 | 11 | 11 |
| 12 | 14 | 11 | 14 | 20 | 14 | 12 | 12 | 24 | 20 | 32 | 30 | 11 | 11 |
| 12 | 14 | 11 | 14 | 19 | 14 | 12 | 12 | 24 | 20 | 32 | 30 | 11 | 11 |
| 12 | 14 | 11 | 14 | 18 | 14 | 12 | 12 | 24 | 20 | 32 | 30 | 11 | 11 |
| 12 | 14 | 11 | 14 | 17 | 14 | 12 | 12 | 25 | 20 | 33 | 30 | 11 | 11 |
| 12 | 14 | 11 | 14 | 19 | 15 | 11 | 12 | 24 | 20 | 32 | 29 | 11 | 11 |
| 12 | 14 | 11 | 14 | 17 | 14 | 12 | 12 | 24 | 20 | 32 | 30 | 11 | 11 |
| 12 | 14 | 11 | 14 | 17 | 14 | 13 | 12 | 24 | 20 | 31 | 30 | 11 | 11 |
| 12 | 14 | 11 | 14 | 19 | 13 | 12 | 12 | 23 | 19 | 33 | 30 | 11 | 11 |
| 12 | 14 | 11 | 14 | 19 | 14 | 11 | 13 | 24 | 20 | 32 | 29 | 11 | 11 |
| 12 | 15 | 11 | 14 | 19 | 14 | 12 | 12 | 24 | 20 | 33 | 30 | 11 | 11 |
| 12 | 14 | 11 | 14 | 17 | 13 | 11 | 12 | 24 | 20 | 31 | 30 | 11 | 11 |
| 12 | 14 | 11 | 14 | 19 | 14 | 12 | 12 | 24 | 20 | 30 | 30 | 11 | 11 |
| 12 | 14 | 11 | 14 | 19 | 12 | 12 | 12 | 23 | 20 | 33 | 31 | 11 | 11 |
| 12 | 14 | 11 | 14 | 16 | 15 |    | 12 | 23 | 20 | 35 | 30 |    | 11 |
| 12 | 14 | 11 | 13 | 18 | 14 | 12 | 12 | 24 | 19 | 31 | 31 | 11 | 11 |
| 12 | 14 | 11 | 14 | 19 | 13 | 12 | 12 | 24 | 20 | 33 | 30 | 11 | 11 |
| 12 | 14 | 11 | 14 | 19 | 14 |    | 12 | 24 | 20 | 32 | 30 |    | 11 |
| 12 | 14 | 11 | 14 | 19 | 14 | 12 | 12 | 24 | 19 | 31 | 28 | 11 | 11 |
| 12 | 14 | 11 | 14 | 19 | 13 | 12 | 12 | 24 | 20 | 30 | 30 | 11 | 11 |
| 12 | 14 | 11 | 14 | 19 | 13 | 12 | 12 | 24 | 20 | 32 | 30 | 11 | 11 |
| 12 | 14 | 12 | 14 | 18 | 13 | 12 | 12 | 24 | 20 | 33 | 30 | 11 | 11 |
| 12 | 14 | 11 | 14 | 19 | 12 | 12 | 12 | 24 | 20 | 35 | 30 | 11 | 11 |
| 12 | 14 | 11 | 14 | 17 | 15 | 12 | 12 | 24 | 20 | 31 | 30 | 11 | 11 |
| 12 | 14 | 11 | 14 | 18 | 13 | 12 | 12 | 24 | 20 | 31 | 30 | 11 | 11 |
| 12 | 14 | 11 | 14 | 19 | 13 | 12 | 12 | 24 | 20 | 33 | 30 | 11 | 11 |
| 12 | 14 | 11 | 14 | 19 | 13 | 12 | 12 | 24 | 20 | 35 | 29 | 11 | 11 |
| 12 | 14 | 11 | 14 | 18 | 14 | 12 | 13 | 23 | 20 | 31 | 30 | 11 | 11 |
| 12 | 14 | 11 | 14 | 19 | 13 | 12 | 12 | 24 | 20 | 34 | 31 | 11 | 11 |

|    |    |    |    |    |    |    |    |    |    |    |    |    |    |
|----|----|----|----|----|----|----|----|----|----|----|----|----|----|
| 12 | 14 | 11 | 14 | 17 | 13 | 12 | 12 | 23 | 20 | 30 | 30 | 11 | 11 |
| 12 | 14 | 11 | 14 | 19 | 14 | 12 | 12 | 25 | 20 | 31 | 30 | 11 | 11 |
| 12 | 14 | 11 | 14 | 17 | 14 | 12 | 12 | 24 | 19 | 32 | 30 | 11 | 11 |
| 12 | 14 | 11 | 14 | 19 | 13 | 12 | 12 | 23 | 21 | 31 | 30 | 11 | 11 |
| 12 | 14 | 11 | 14 | 19 | 14 | 12 | 12 | 23 | 22 | 31 | 30 | 11 | 11 |
| 12 | 14 | 11 | 14 | 18 | 14 | 12 | 12 | 24 | 22 | 32 | 30 | 11 | 11 |
| 12 | 14 | 11 | 14 | 19 | 15 | 13 | 13 | 24 | 20 | 31 | 30 | 11 | 11 |
| 12 | 13 | 12 | 14 | 18 | 14 | 12 | 11 | 24 | 20 | 31 | 30 | 11 | 11 |
| 12 | 14 | 11 |    | 17 | 14 | 12 | 12 | 24 | 20 |    | 30 | 11 |    |
| 12 | 14 | 11 | 14 | 19 | 14 | 12 | 12 | 23 | 19 | 31 | 30 | 11 | 11 |
| 12 | 14 | 11 | 14 | 21 | 13 | 12 | 12 | 23 | 21 | 31 | 30 | 11 | 11 |
| 12 | 14 | 11 | 14 | 20 | 14 | 12 | 12 | 23 | 21 | 32 | 30 | 11 | 11 |
|    | 14 |    | 14 | 19 | 13 | 12 | 12 |    |    | 32 | 32 | 11 | 11 |
| 12 | 14 | 11 | 14 | 19 | 14 | 12 | 12 | 23 | 21 | 31 | 30 | 11 | 11 |
| 12 | 14 | 11 | 14 | 18 | 13 | 12 | 12 | 24 | 20 | 32 | 31 | 11 | 11 |
| 11 | 14 | 11 | 14 | 18 | 14 | 12 | 12 | 23 | 22 | 31 | 30 | 11 | 11 |
| 12 | 14 | 11 | 14 | 20 | 14 | 12 | 12 | 23 | 21 | 30 | 30 | 11 | 11 |
| 12 | 14 | 11 | 14 | 20 | 14 | 12 | 13 | 23 | 21 | 31 | 30 | 11 | 11 |
| 12 | 14 | 11 | 14 | 18 | 13 | 12 | 13 | 24 | 20 | 32 | 32 | 11 | 11 |
| 12 |    | 11 | 14 |    |    | 12 |    | 23 | 21 | 31 |    | 11 | 11 |
| 12 |    | 11 | 14 |    |    | 12 |    | 25 | 20 | 32 |    | 11 | 11 |
| 12 | 14 | 11 | 14 | 20 | 14 | 12 | 12 | 23 | 21 | 30 | 30 | 11 |    |
| 12 | 14 | 11 | 14 | 19 | 14 | 12 | 12 | 23 | 19 | 31 | 30 | 11 | 11 |
| 12 | 14 | 11 | 14 | 20 | 13 | 12 | 12 | 24 | 20 | 32 | 31 | 11 | 11 |
| 12 | 14 | 11 | 14 | 19 | 14 | 12 | 12 | 23 | 21 | 31 | 29 | 11 | 11 |
| 12 | 14 | 11 | 14 | 21 | 13 | 12 | 12 | 24 | 21 | 31 | 30 | 11 | 11 |
|    |    |    | 14 |    |    |    |    |    |    | 31 |    |    | 11 |
| 12 | 14 | 11 | 14 | 19 | 13 | 12 | 11 | 24 | 20 | 32 | 32 | 11 | 11 |
| 12 | 14 | 11 | 14 | 20 | 13 | 12 | 12 | 23 | 21 | 31 | 30 | 11 | 11 |
| 12 |    | 11 | 14 |    |    | 12 |    | 23 | 21 | 31 |    | 11 | 11 |
| 12 | 14 | 11 | 14 | 20 | 14 | 12 | 12 | 23 | 21 | 31 | 30 | 11 | 11 |
| 12 | 14 | 11 | 14 | 18 | 14 | 12 | 12 | 24 | 20 | 32 | 30 | 11 | 11 |
| 12 | 14 | 11 | 14 | 19 | 14 | 12 | 12 | 23 | 21 | 31 | 30 | 11 | 11 |
|    | 14 |    | 14 | 19 | 14 | 12 | 12 |    |    | 31 | 30 | 11 | 11 |

|    |    |    |    |    |    |    |    |    |    |    |    |    |    |
|----|----|----|----|----|----|----|----|----|----|----|----|----|----|
| 12 | 14 | 11 | 14 | 20 | 14 | 12 | 12 | 23 | 21 | 31 | 30 | 11 | 11 |
|    | 14 |    | 14 | 19 | 14 | 12 | 12 |    |    | 32 | 30 | 11 | 11 |
| 12 | 14 | 11 | 14 | 18 | 13 | 12 | 11 | 24 | 20 | 32 | 30 | 11 | 11 |
|    | 14 |    | 14 | 19 | 14 | 12 | 12 |    |    | 31 | 30 | 11 | 11 |
| 12 | 14 | 11 | 14 | 20 | 13 | 12 | 12 | 23 | 21 | 31 | 30 | 11 | 11 |
| 12 | 14 | 11 | 14 | 19 | 15 | 12 | 11 | 23 | 20 | 32 | 30 | 11 | 11 |
| 12 | 14 | 11 | 14 | 20 | 13 | 12 | 12 | 24 | 21 | 31 | 30 | 11 | 11 |
| 12 | 14 | 11 | 14 | 20 | 14 | 12 | 12 | 23 | 21 | 31 | 30 | 11 | 11 |
| 12 | 14 | 11 | 14 | 20 | 15 | 12 | 12 | 23 | 22 | 31 | 30 | 11 | 11 |
| 12 | 14 | 11 | 14 | 19 | 14 | 12 | 12 | 23 | 20 | 33 | 31 | 11 | 11 |
| 12 | 14 | 11 | 14 | 19 | 14 | 12 | 12 | 23 | 19 | 32 | 30 | 11 | 11 |
|    |    |    | 14 |    |    | 12 |    |    |    | 32 |    | 11 | 11 |
| 12 | 14 | 11 | 14 | 19 | 14 | 12 | 12 | 23 | 20 | 31 | 30 | 11 | 11 |
| 12 | 14 | 11 | 14 | 19 | 14 | 12 | 12 | 23 | 21 | 31 | 30 | 11 | 11 |
| 12 | 14 | 11 | 14 | 20 | 14 | 12 | 12 | 23 | 21 | 31 | 30 | 11 | 11 |
| 12 | 14 | 11 | 14 | 19 | 14 | 12 | 12 | 23 | 21 | 31 | 30 | 11 | 11 |
| 12 | 14 | 11 | 14 | 19 | 14 | 12 | 12 | 23 | 21 | 31 | 30 | 11 | 11 |
| 12 | 14 | 11 | 14 | 19 | 14 | 12 | 12 | 23 | 20 | 33 | 31 | 11 | 11 |
| 12 |    | 11 | 14 |    |    | 12 |    | 23 | 21 | 30 |    | 11 | 11 |
| 12 | 14 | 11 | 14 | 20 | 14 | 12 | 12 | 23 | 21 | 31 | 30 | 11 | 11 |
| 12 | 14 | 11 | 14 | 21 | 13 | 12 | 12 | 23 | 21 | 31 | 30 | 11 | 11 |
| 12 | 14 | 12 | 14 | 19 | 13 | 12 | 12 | 24 | 20 | 32 | 30 | 11 | 11 |
| 12 | 14 | 11 | 14 | 20 | 14 | 12 | 12 | 23 | 21 | 32 | 30 | 11 | 11 |
| 12 | 14 | 11 | 14 | 20 | 14 | 12 | 12 | 23 | 21 | 31 | 30 | 11 | 11 |
| 12 | 14 | 11 | 14 | 20 | 13 | 12 | 12 | 23 | 21 | 31 | 30 | 11 | 11 |
|    | 14 |    | 14 | 20 | 14 | 12 | 12 |    |    | 32 | 30 | 11 | 11 |
| 12 |    | 11 | 14 |    |    | 12 |    | 23 | 21 | 31 |    | 11 | 11 |
| 12 | 14 | 11 | 14 | 20 | 14 | 12 | 12 | 23 | 21 | 31 | 30 | 11 | 11 |
|    | 14 |    | 14 | 20 | 15 | 12 | 12 |    |    | 32 | 30 | 11 | 11 |
| 12 | 14 | 11 | 14 | 20 | 14 | 12 | 12 | 23 | 21 | 31 | 30 | 11 | 11 |
| 12 | 14 | 11 | 14 | 21 | 14 | 12 | 12 | 23 | 21 | 31 | 30 | 11 | 11 |
| 12 | 14 | 11 | 14 | 19 | 14 | 12 | 12 | 23 | 22 | 31 | 30 | 11 | 11 |
|    | 14 |    | 14 | 17 | 13 | 12 | 12 |    |    | 33 | 31 | 11 | 11 |
| 12 | 14 | 11 | 14 | 19 | 14 | 12 | 12 | 23 | 21 | 31 | 30 | 12 | 11 |

|    |    |    |    |    |    |    |    |    |    |    |    |    |    |
|----|----|----|----|----|----|----|----|----|----|----|----|----|----|
| 12 | 14 | 11 | 14 | 19 | 14 | 12 | 12 | 23 | 20 | 33 | 31 | 11 | 11 |
| 12 | 13 | 11 | 14 | 18 | 12 | 12 | 12 | 24 | 20 | 33 | 30 | 11 | 11 |
| 12 | 14 | 11 | 14 | 19 | 14 | 12 | 12 | 23 | 22 | 32 | 30 | 11 | 11 |
| 12 | 15 | 11 | 14 | 19 | 14 | 13 | 12 | 25 | 20 | 30 | 30 | 11 | 11 |
| 12 | 14 | 11 | 14 | 20 | 13 | 12 | 12 | 23 | 21 | 31 | 30 | 11 | 11 |
| 12 | 14 | 11 | 14 | 18 | 13 | 12 | 13 | 24 | 20 | 32 | 31 | 11 | 11 |
| 12 | 14 | 11 | 14 | 19 | 14 | 12 | 12 | 23 | 21 | 31 | 30 | 11 | 11 |
|    | 14 |    | 14 | 20 | 13 | 12 | 12 |    |    | 31 | 30 | 11 | 11 |
| 12 | 14 | 11 | 14 | 20 | 14 | 12 | 12 | 23 | 21 | 31 | 30 | 11 | 11 |
| 12 | 14 | 11 | 14 | 18 | 14 | 12 | 12 | 24 | 20 | 31 | 30 | 11 | 11 |
| 12 | 14 | 11 | 14 | 21 | 14 | 12 | 12 | 23 | 21 | 31 | 30 | 11 | 11 |
|    | 14 |    | 14 | 19 | 14 | 12 | 12 |    |    | 31 | 30 | 11 | 11 |
| 12 | 14 | 11 | 14 | 18 | 14 | 12 | 12 | 25 | 19 | 32 | 31 | 11 | 11 |
|    | 14 |    | 14 | 17 | 13 | 12 | 12 |    |    | 33 |    | 11 | 11 |
| 12 | 14 | 11 | 14 | 18 | 14 | 12 | 12 | 24 | 19 | 32 |    | 11 | 11 |
| 12 | 14 | 11 | 14 | 18 | 13 | 12 | 12 | 24 | 20 | 33 | 30 | 11 | 11 |
| 12 | 14 | 11 | 14 | 20 | 14 | 12 | 12 | 24 | 20 | 31 | 30 | 11 | 11 |
| 12 | 14 | 11 | 14 | 19 | 14 | 13 | 12 | 24 | 20 | 32 | 30 | 11 | 11 |
| 12 | 14 | 11 | 14 | 19 | 13 | 12 | 12 | 24 | 20 | 31 | 28 | 11 | 11 |
| 12 | 14 | 11 | 15 | 18 | 14 | 12 | 13 | 23 | 20 | 34 | 30 | 11 | 11 |
| 12 | 14 | 11 | 14 | 19 | 14 | 12 | 12 | 24 | 20 | 29 | 30 | 11 | 11 |
| 12 | 14 | 11 | 14 | 17 | 14 | 12 | 12 | 24 | 20 | 31 | 30 | 11 | 11 |
| 12 | 14 | 11 | 14 | 19 | 13 | 12 | 14 | 24 | 20 | 32 | 30 | 11 | 11 |
| 12 | 14 | 11 | 14 | 19 | 13 | 12 | 12 | 24 | 20 | 32 | 30 | 11 | 11 |
| 12 | 14 | 11 | 14 | 17 | 14 | 12 | 12 | 24 | 20 | 31 | 29 | 11 | 11 |
| 12 | 14 | 11 | 14 | 19 | 14 | 12 | 12 | 24 | 20 | 32 | 30 | 11 | 10 |
| 12 | 14 | 11 | 14 | 19 | 14 | 12 | 12 | 24 | 20 | 34 | 30 | 11 | 11 |
| 12 | 14 | 12 | 14 | 19 | 15 | 12 | 12 | 23 | 20 | 34 | 30 | 11 | 11 |
| 12 | 14 | 11 | 14 | 19 | 13 | 12 | 12 | 24 | 20 | 32 | 30 | 11 | 11 |
| 12 | 14 | 11 | 14 | 17 | 14 | 12 | 12 | 24 | 20 | 32 | 30 | 10 | 11 |
| 12 | 14 | 11 | 14 | 19 | 14 | 13 | 12 | 24 | 20 | 33 | 30 | 11 | 11 |
| 12 | 14 | 11 | 14 | 18 | 13 | 12 | 12 | 24 | 20 | 33 | 28 | 11 | 11 |
| 12 | 14 | 11 | 14 | 17 | 14 | 12 | 12 | 24 | 20 | 32 | 30 | 11 | 11 |
| 12 | 14 | 11 | 14 | 19 | 14 | 12 | 12 | 24 | 20 | 32 | 30 | 11 | 11 |

|    |    |    |    |    |    |    |    |    |    |    |    |    |    |
|----|----|----|----|----|----|----|----|----|----|----|----|----|----|
| 12 | 14 | 11 | 14 | 19 | 15 | 12 | 13 | 23 | 19 | 33 | 30 | 11 | 11 |
| 12 | 14 | 11 | 14 | 19 | 13 | 12 | 14 | 24 | 20 | 33 | 30 | 11 | 11 |
| 12 | 14 | 11 | 13 | 17 | 13 | 12 | 12 | 24 | 20 | 31 | 30 | 11 | 11 |
| 12 | 14 | 11 | 14 | 19 | 12 | 12 | 13 | 23 | 20 | 33 | 30 | 11 | 11 |
| 12 | 14 | 11 | 14 | 17 | 14 | 12 | 13 | 24 | 20 | 32 | 30 | 11 | 11 |
| 12 | 14 | 11 | 12 | 18 | 14 | 12 | 12 | 23 | 20 | 32 | 29 | 11 | 11 |
| 12 |    | 11 | 14 |    |    |    |    | 25 | 20 | 33 |    |    | 11 |
| 12 | 14 | 11 | 14 | 17 | 14 | 12 | 13 | 24 | 20 | 29 | 30 | 11 | 11 |
| 12 | 14 | 11 | 13 | 18 | 13 | 12 | 12 | 23 | 20 | 33 | 29 | 11 | 11 |
| 12 | 14 | 11 | 15 | 19 | 14 | 12 | 13 | 24 | 20 | 32 | 29 | 11 | 11 |
| 12 | 14 | 10 | 14 | 19 | 14 | 12 | 13 | 23 | 20 | 34 | 30 | 11 | 11 |
| 12 | 14 | 11 | 14 | 19 | 13 | 13 | 12 | 24 | 20 | 31 | 28 | 11 | 12 |
| 12 | 14 | 11 | 14 | 19 | 13 | 13 | 12 | 24 | 20 | 34 | 30 | 11 | 11 |
| 12 | 14 | 11 | 14 | 19 | 13 | 12 | 10 | 24 | 20 | 32 | 30 | 11 | 11 |
| 12 | 14 | 12 | 14 | 17 | 13 | 12 | 12 | 24 | 20 | 36 | 30 | 11 | 11 |
| 12 | 14 | 11 | 14 | 19 | 15 | 12 | 12 | 24 | 20 | 33 | 30 | 11 | 11 |
| 12 | 14 | 11 | 14 | 17 | 14 | 12 | 12 | 24 | 20 | 31 | 30 | 11 | 11 |
| 12 | 15 | 11 | 14 | 17 | 14 | 12 | 12 | 24 |    | 32 | 30 | 11 | 11 |
| 12 | 14 | 11 | 14 | 16 | 14 | 12 | 13 | 24 | 20 | 32 | 30 | 11 | 11 |
| 12 | 14 | 11 | 14 | 17 | 13 | 12 | 12 | 25 | 20 | 33 | 30 | 11 | 11 |
| 12 | 14 | 11 | 14 | 19 | 13 | 12 | 12 | 24 | 19 | 32 | 30 | 11 | 11 |
| 12 | 14 | 11 | 14 | 16 | 14 | 12 | 12 | 24 | 21 | 31 | 30 | 11 | 11 |
| 12 | 14 | 11 | 14 | 18 | 15 | 12 | 12 | 24 | 20 | 32 | 30 | 11 | 11 |
| 12 | 14 | 11 | 14 |    | 14 | 12 | 12 | 24 | 19 | 31 | 30 | 11 | 11 |
|    | 14 | 11 | 14 | 17 | 13 |    | 13 |    | 20 | 33 | 30 |    | 11 |
| 12 | 14 | 11 | 14 | 20 | 14 | 12 | 12 | 24 | 20 | 34 | 30 | 11 | 11 |
| 12 | 14 | 11 | 14 | 19 | 15 |    | 12 | 25 | 20 | 32 | 30 |    | 11 |
| 12 | 14 | 11 | 14 | 19 | 13 | 12 | 12 | 24 | 20 | 31 | 28 | 11 | 11 |
| 12 | 14 | 11 | 14 | 19 | 14 | 12 | 12 | 24 | 20 | 30 | 28 | 11 | 10 |
| 12 | 14 | 11 | 14 | 17 | 13 | 12 | 12 | 24 | 20 | 32 | 30 | 11 | 11 |
| 12 | 14 | 11 | 14 |    | 13 | 12 | 12 |    | 20 | 34 |    | 11 | 11 |
|    | 14 |    |    | 17 | 14 | 13 | 12 |    |    |    | 30 | 11 |    |
| 12 | 14 | 11 | 15 | 19 | 14 | 12 | 12 | 24 | 20 | 31 | 28 | 11 | 11 |
| 12 | 14 | 11 | 14 | 18 | 14 | 12 | 12 | 24 | 20 | 32 | 30 | 11 | 11 |

|    |    |    |    |    |    |    |    |    |    |    |    |    |    |
|----|----|----|----|----|----|----|----|----|----|----|----|----|----|
| 12 | 14 | 11 | 14 | 18 | 14 | 12 | 12 | 24 | 20 | 32 | 28 | 11 | 11 |
| 12 | 14 | 11 | 14 | 19 | 15 | 12 | 12 | 24 | 20 | 32 | 29 | 11 | 11 |
| 12 | 14 | 11 | 14 | 19 | 15 |    | 12 | 24 | 20 | 33 | 29 |    | 11 |
| 12 | 14 | 11 | 14 | 20 | 13 | 12 | 12 | 24 | 20 | 32 | 30 | 11 | 11 |
|    | 14 | 11 | 14 | 17 | 13 | 12 | 12 |    | 20 | 32 | 30 | 11 | 11 |
| 12 | 14 | 11 | 14 | 18 | 15 | 12 | 12 | 24 | 20 | 31 | 31 | 11 | 11 |
| 12 | 14 | 12 | 14 | 18 | 13 |    | 12 | 24 | 20 | 35 | 30 |    | 11 |
| 12 | 14 | 11 | 14 | 19 | 14 | 12 | 12 | 24 | 20 | 31 | 31 | 11 | 11 |
| 12 | 14 | 11 | 14 | 20 | 14 | 12 | 12 | 24 | 20 | 32 | 30 | 11 | 11 |
| 12 | 14 | 11 | 14 | 18 | 15 | 12 | 12 | 24 | 20 | 31 | 30 | 11 | 11 |
| 12 | 14 | 11 | 14 | 18 | 14 | 12 | 12 | 23 | 20 | 33 | 30 | 11 | 11 |
|    | 14 | 11 | 14 | 18 | 14 |    | 13 |    | 20 | 30 | 30 |    | 11 |
| 12 | 14 | 11 | 14 | 19 | 14 | 12 | 12 | 24 | 20 | 32 | 30 | 11 | 11 |
| 12 | 14 | 11 | 14 | 19 | 14 | 12 | 12 | 24 | 20 | 32 | 30 | 11 | 11 |
| 12 | 14 | 11 | 14 | 16 | 14 | 13 | 13 | 24 | 20 | 30 | 30 | 11 | 11 |
| 12 | 14 | 11 | 14 | 18 | 13 | 12 | 12 | 24 | 20 | 33 | 30 | 12 | 11 |
| 12 | 14 | 11 | 14 | 19 | 13 | 12 | 12 | 25 | 20 | 33 | 30 | 11 | 11 |
| 11 | 14 | 11 | 14 | 19 | 14 | 12 | 12 | 24 | 20 | 35 | 30 | 11 | 11 |
| 12 | 14 | 11 | 14 | 19 | 14 | 12 | 12 | 23 | 20 | 32 | 30 | 11 | 11 |
| 12 |    | 11 | 14 |    |    | 12 |    | 24 | 20 | 31 |    | 11 | 11 |
| 12 | 14 | 11 | 14 | 17 | 13 | 12 | 12 | 23 | 20 | 31 | 31 | 11 | 11 |
| 12 |    | 11 | 14 |    |    | 12 |    | 23 | 20 | 35 |    |    | 11 |
| 12 | 14 | 11 | 14 | 19 | 14 | 12 | 13 | 23 | 20 | 32 | 30 | 11 | 11 |
| 12 | 14 | 11 | 14 |    |    | 12 |    | 23 | 20 | 32 |    | 11 | 11 |
| 12 | 14 | 11 | 15 | 18 | 14 | 12 | 13 | 23 | 20 | 33 | 30 | 11 | 11 |
| 12 | 14 | 11 | 14 | 19 | 15 | 12 | 12 | 23 | 20 | 31 | 30 | 11 | 11 |
| 12 | 14 | 11 | 14 | 18 | 14 | 12 | 12 | 23 | 20 | 33 | 30 | 11 | 11 |
| 11 | 14 | 11 | 14 | 17 | 14 | 12 | 12 | 23 | 20 | 31 | 30 | 11 | 11 |
| 12 | 14 | 11 | 14 | 19 | 12 | 12 | 13 | 23 | 20 | 32 | 30 | 12 | 11 |
| 12 |    | 11 | 14 |    |    | 12 |    | 23 | 20 | 30 |    | 11 | 11 |
| 12 | 14 | 11 | 14 | 19 | 13 | 12 | 13 | 23 | 20 | 34 | 30 | 11 | 11 |
| 12 |    | 11 | 14 |    |    | 12 |    | 23 | 20 | 33 |    | 11 | 11 |
| 12 | 14 | 11 | 13 | 16 | 13 | 12 | 12 | 23 | 20 | 31 | 30 | 11 | 11 |
| 12 | 14 | 11 | 14 | 17 | 14 | 12 | 13 | 23 | 20 | 33 | 30 | 11 | 11 |

|    |    |    |    |    |    |    |    |    |    |    |    |    |    |
|----|----|----|----|----|----|----|----|----|----|----|----|----|----|
| 12 | 14 | 11 | 14 | 16 | 13 | 12 | 12 | 23 | 20 | 30 | 30 | 11 | 11 |
| 12 | 14 | 11 | 14 | 18 | 14 | 12 | 12 | 23 | 20 | 32 | 30 | 11 | 11 |
| 12 | 14 | 11 | 14 | 19 | 14 | 12 | 13 | 23 | 20 | 32 | 30 | 11 | 11 |
| 12 | 14 | 11 | 14 | 18 | 13 | 12 | 13 | 24 | 20 | 35 | 30 | 11 | 11 |
| 12 | 14 | 11 | 14 | 19 | 14 | 12 | 11 | 24 | 20 | 31 | 30 | 11 | 11 |
| 12 | 14 | 11 | 14 | 19 | 14 | 12 | 12 | 23 | 20 | 30 | 30 | 11 | 11 |
| 12 | 14 | 10 | 14 | 17 | 14 | 12 | 13 | 23 | 20 | 35 | 30 | 11 | 11 |
| 12 | 14 | 11 | 14 | 19 | 14 | 12 | 13 | 23 | 20 | 32 | 31 | 11 | 11 |
| 12 | 14 | 11 | 14 | 18 | 15 | 12 | 12 | 23 | 20 | 32 | 30 | 11 | 11 |
| 12 | 14 | 11 | 14 | 20 | 16 | 12 | 12 | 23 | 20 | 33 | 30 | 11 | 11 |
| 12 | 14 | 11 | 15 | 19 | 15 | 12 | 13 | 23 | 20 | 34 | 30 | 11 | 11 |
| 12 | 14 | 11 | 14 | 19 | 14 | 12 | 13 | 23 | 20 | 34 | 30 | 11 | 11 |
| 12 | 14 | 11 | 14 | 18 | 13 | 12 | 13 | 23 | 20 | 32 | 30 | 11 | 11 |
| 12 | 14 | 11 | 14 | 17 | 14 | 12 | 13 | 23 | 20 | 35 | 30 | 11 | 11 |
| 12 | 14 | 11 | 14 | 18 | 14 | 12 | 12 | 23 | 21 | 32 | 30 | 11 | 11 |
| 12 | 14 | 11 | 14 | 18 | 14 | 12 | 10 | 23 | 20 | 31 | 30 | 11 | 11 |
| 12 | 14 | 11 | 14 | 18 | 14 | 12 | 13 | 23 | 20 | 32 |    | 11 | 11 |
| 12 | 14 | 11 | 14 | 18 | 14 | 12 | 12 | 23 | 20 | 33 | 30 | 11 | 11 |
| 12 | 14 | 11 | 14 | 19 | 14 | 12 | 13 | 23 | 20 | 35 | 30 | 11 | 11 |
| 12 | 14 | 11 | 14 | 18 | 14 | 12 | 12 | 23 | 20 | 30 | 30 | 11 | 11 |
| 12 | 14 | 11 | 14 | 18 | 13 | 12 | 12 | 23 | 20 | 32 | 30 | 11 | 11 |
| 12 | 14 | 11 | 14 | 20 | 13 | 12 | 13 | 23 | 20 | 32 | 30 | 11 | 11 |
| 12 | 14 | 11 | 14 | 19 | 14 | 12 | 12 | 23 | 20 | 31 | 29 | 11 | 11 |
| 12 | 14 | 11 | 14 | 19 | 13 | 12 | 12 | 23 | 20 | 31 | 30 | 11 | 11 |
| 12 | 14 | 11 | 14 | 18 | 14 | 13 | 13 | 23 | 19 | 32 | 30 | 11 | 11 |
| 12 | 14 | 11 | 14 | 17 | 12 | 12 | 13 | 23 | 20 | 32 | 30 | 11 | 11 |
| 12 | 14 | 11 | 14 | 18 | 14 | 12 | 12 | 23 | 20 | 33 | 30 | 11 | 11 |
| 12 | 14 | 11 | 14 | 18 | 13 |    | 12 | 23 | 20 | 31 | 30 |    | 11 |
| 12 | 14 | 11 | 14 | 18 | 14 |    | 13 | 23 | 20 | 33 | 30 |    | 11 |
| 12 |    | 11 | 14 |    |    |    |    | 23 | 20 | 31 |    |    | 11 |
| 12 | 14 | 11 | 14 | 18 | 14 |    | 13 | 23 | 20 | 33 | 30 |    | 11 |
| 12 | 14 | 11 | 14 | 18 | 12 | 12 | 13 | 23 | 20 | 32 | 30 | 11 | 11 |
| 12 | 14 | 11 | 14 | 19 | 14 | 12 | 13 | 23 | 20 | 32 | 29 | 11 | 11 |
| 12 | 14 | 11 | 14 | 18 | 14 | 12 | 12 | 23 | 20 | 32 | 30 | 11 | 11 |

|    |    |    |    |    |    |    |    |    |    |    |    |    |    |
|----|----|----|----|----|----|----|----|----|----|----|----|----|----|
| 12 | 14 | 11 | 14 | 19 | 14 | 13 | 12 | 23 | 20 | 32 | 30 | 11 | 11 |
| 12 | 14 | 11 | 14 | 18 | 14 | 12 | 12 | 23 | 20 | 35 | 30 | 11 | 11 |
| 12 | 14 | 11 | 13 | 18 | 14 | 12 | 12 | 23 | 20 | 32 | 30 | 11 | 11 |
| 12 | 14 | 11 | 14 | 18 | 13 | 12 | 13 | 23 | 20 | 32 | 29 | 12 | 11 |
| 12 | 14 | 11 | 14 | 18 | 14 | 12 | 12 | 23 | 20 | 31 | 30 | 11 | 11 |
| 12 | 14 | 11 | 14 | 18 | 14 | 12 | 12 | 23 | 20 | 32 | 30 | 11 | 11 |
| 12 |    | 11 | 14 |    |    | 12 |    | 23 | 20 | 34 |    | 11 | 11 |
| 12 | 14 | 11 | 14 | 19 | 13 | 12 | 13 | 23 | 20 | 32 | 30 | 11 | 11 |
| 12 | 14 | 11 | 14 | 18 | 14 | 12 | 13 | 23 | 20 | 31 | 30 | 13 | 11 |
| 12 | 14 | 11 | 14 | 19 | 14 | 13 | 13 | 23 | 20 | 32 | 30 | 11 | 11 |
| 12 | 13 | 11 | 14 | 19 | 13 | 12 | 14 | 23 | 19 | 33 | 30 | 11 | 11 |
| 12 | 14 | 11 | 13 | 17 | 14 | 12 | 12 | 23 | 20 | 32 | 30 | 11 | 11 |
| 12 | 14 | 11 | 14 | 18 | 14 | 12 | 12 | 23 | 20 | 31 | 30 | 11 | 11 |
| 12 | 14 | 11 | 14 | 19 | 13 | 12 | 13 | 24 | 20 | 32 | 30 | 11 | 11 |
| 12 | 14 | 11 | 14 | 19 | 14 | 12 | 13 | 23 | 20 | 33 | 30 | 11 | 11 |
| 12 | 14 | 11 | 14 | 18 | 13 | 12 | 13 | 23 | 20 | 31 | 30 | 11 | 11 |
| 12 |    | 11 | 14 |    |    | 12 |    | 22 | 20 | 30 |    | 11 | 11 |
| 12 | 14 | 11 | 14 | 19 | 13 | 12 | 12 | 23 | 20 | 31 | 30 | 11 | 11 |
| 12 | 14 | 11 | 14 | 18 | 13 | 12 | 13 | 23 | 20 | 33 | 30 | 11 | 11 |
| 12 | 14 | 11 | 14 | 19 | 14 | 12 | 13 | 23 | 21 | 33 | 30 | 11 | 11 |



| DYS456 | DYS458   | DYS459 | DYS460 | DYS462 | DYS463 | GGAAT1B07 | YCAII    | YGATAA10 | YGATAC4 | YGATAH4.1 |
|--------|----------|--------|--------|--------|--------|-----------|----------|----------|---------|-----------|
| 16     | 15 9-10  |        | 11     | 11     | 25     |           | 9 19-23  | 15       | 23      | 22        |
| 14     | 14 9-10  |        | 11     | 11     |        |           | 9 19-23  | 14       | 23      | 21        |
| 17     | 15 9-10  |        | 10     | 12     | 24     |           | 9 19-23  | 15       | 23      | 21        |
| 14     | 14 9-11  |        | 11     | 11     | 25     |           | 9 19-23  | 14       | 23      | 21        |
| 16     | 16 9-10  |        | 11     | 11     | 24     |           | 9 19-24  | 15       | 23      | 22        |
| 17     | 15 9-10  |        | 11     | 11     |        |           | 9 19-23  | 16       | 23      | 22        |
| 16     | 15 9-9   |        | 11     | 11     |        |           | 9 19-23  | 15       | 23      | 21        |
| 16     | 16 10-10 |        | 11     | 11     | 24     |           | 9 19-23  | 16       | 23      | 22        |
| 16     | 15 9-10  |        | 11     | 11     | 24     |           | 9 19-23  | 15       | 23      | 21        |
| 16     | 16 9-9   |        | 11     | 12     |        |           | 9 19-21  | 13       | 23      | 23        |
| 19     | 15 9-10  |        | 12     | 11     | 24     |           | 9 19-23  | 15       | 23      | 22        |
| 15     | 17 9-10  |        | 11     | 11     | 24     |           | 9 19-23  | 15       | 24      | 22        |
| 16     | 16 9-10  |        | 11     | 11     | 23     |           | 9 19-23  | 15       | 23      | 22        |
| 15     | 15 9-10  |        | 11     | 11     | 24     |           | 9 19-20  | 15       | 23      | 21        |
| 16     | 15 9-10  |        | 11     | 11     | 24     |           | 9 19-21  | 15       | 23      | 22        |
| 15     | 15 10-10 |        | 11     | 11     | 24     |           | 10 19-22 | 14       | 23      | 22        |
| 17     | 15 9-9   |        | 11     | 12     | 24     |           | 9 19-23  | 15       | 23      | 21        |
| 16     | 15 9-10  |        | 12     | 11     | 25     |           | 9 19-23  | 16       | 23      | 22        |
| 16     | 16 9-10  |        | 11     | 11     | 24     |           | 10 19-23 | 15       | 23      | 20        |
| 16     | 15 9-10  |        | 11     | 11     | 24     |           | 10 19-20 | 15       | 23      | 23        |
| 16     | 15 9-10  |        | 11     | 11     | 23     |           | 9 19-23  | 15       | 23      | 21        |
| 16     | 16 9-10  |        | 11     | 11     | 24     |           | 9 19-21  | 15       | 24      | 22        |
| 15     | 16 9-10  |        | 11     | 12     | 23     |           | 9 19-23  | 16       | 23      | 21        |
| 15     | 18 9-10  |        | 11     | 11     | 24     |           | 9 23-23  | 14       | 23      | 21        |
| 16     | 17 9-9   |        | 12     | 11     | 24     |           | 9 19-23  | 15       | 23      | 22        |
| 17     | 17 9-10  |        | 11     | 11     | 24     |           | 9 19-23  | 16       | 24      | 21        |
| 16     | 14 9-10  |        | 11     | 11     | 25     |           | 9 19-23  | 17       | 23      | 22        |
| 16     | 16 9-10  |        | 11     | 11     | 24     |           | 9 19-23  | 15       | 23      | 22        |
| 16     | 15 9-10  |        | 11     | 11     | 24     |           | 9 19-23  | 15       | 23      | 22        |
| 16     | 17 9-10  |        | 11     | 11     | 24     |           | 10 19-23 | 16       | 23      | 22        |
| 16     | 14 10-10 |        | 11     | 11     | 24     |           | 9 19-23  | 16       | 23      | 22        |
| 16     | 15 9-10  |        | 11     | 11     | 24     |           | 9 19-23  | 16       | 23      | 21        |

|    |          |    |    |    |          |    |    |    |
|----|----------|----|----|----|----------|----|----|----|
| 19 | 15 9-10  | 12 | 11 | 24 | 9 19-23  | 16 | 23 | 22 |
| 17 | 17 9-10  | 12 | 11 | 24 | 9 19-23  | 16 | 23 | 20 |
| 15 | 16 9-10  | 12 | 11 | 24 | 8 19-23  | 15 | 24 | 21 |
| 16 | 15 9-10  | 12 | 11 | 24 | 9 19-23  | 16 | 24 | 22 |
| 15 | 16 9-10  | 11 | 11 | 24 | 9 19-23  | 16 | 23 | 22 |
| 16 | 14 9-10  | 11 | 11 | 23 | 9 19-23  | 15 | 23 | 22 |
| 15 | 15 9-10  | 11 | 11 | 25 | 9 19-23  | 16 | 23 | 22 |
| 16 | 14 9-9   | 11 | 11 | 24 | 9 19-23  | 17 | 23 | 22 |
| 17 | 15 9-10  | 10 | 12 | 24 | 10 19-23 | 15 | 23 | 22 |
| 15 | 15 9-10  | 11 | 11 | 24 | 9 19-23  | 16 | 23 | 21 |
| 17 | 16 9-10  | 11 | 11 | 24 | 9 19-23  | 15 | 23 | 21 |
| 15 | 15 9-10  | 11 | 11 | 23 | 9 19-21  | 15 | 23 | 22 |
| 15 | 15 9-10  | 11 | 11 | 24 | 9 19-23  | 16 | 23 | 21 |
| 15 | 15 9-10  | 11 | 11 | 24 | 9 19-23  | 16 | 23 | 22 |
| 17 | 16 9-10  | 11 | 11 | 24 | 9 19-23  | 15 | 23 | 21 |
| 15 | 15 9-10  | 11 | 11 | 23 | 9 19-23  | 15 | 23 | 21 |
| 16 | 15 9-10  | 10 | 11 | 24 | 9 21-21  | 16 | 23 | 22 |
| 14 | 14 9-10  | 11 | 11 | 25 | 9 19-23  | 14 | 23 | 21 |
| 17 | 14 9-9   | 12 | 11 | 24 | 9 19-23  | 15 | 23 | 22 |
|    | 15       | 12 | 11 | 24 | 9 19-23  | 15 | 23 | 22 |
| 15 | 15 9-10  | 11 | 11 | 24 | 9 19-24  | 16 | 23 | 21 |
| 15 | 15 9-10  | 11 | 11 | 24 | 9 19-23  | 16 | 23 | 21 |
|    | 15       | 10 | 12 | 24 | 9 19-23  | 14 | 23 | 21 |
| 17 | 15 9-10  | 11 | 11 | 24 | 9 19-23  | 15 | 24 | 22 |
| 15 | 15 9-10  | 11 | 11 | 24 | 9 19-23  | 16 | 23 | 21 |
| 16 | 15 9-10  | 10 | 12 | 24 | 9 19-23  | 15 | 23 | 21 |
| 16 | 16 9-10  | 11 | 11 | 24 | 9 19-23  | 16 | 23 | 22 |
| 16 | 15 9-10  | 13 | 11 |    | 9 19-23  | 17 | 23 | 22 |
| 17 | 15 10-10 | 10 | 12 | 24 | 9 19-23  | 15 | 23 | 20 |
| 15 | 15 9-10  | 11 | 11 | 24 | 9 19-22  | 18 | 23 | 21 |
| 15 | 15 9-10  | 11 | 11 | 24 | 9 19-23  | 16 | 23 | 22 |
| 14 | 15 9-10  | 11 | 11 | 24 | 9 19-23  | 14 | 23 | 22 |
| 17 | 16 9-10  | 12 | 11 | 24 | 9 19-22  | 16 | 24 | 23 |
| 16 | 17 9-10  | 11 | 11 | 24 | 9 19-23  | 16 | 23 | 22 |

|    |         |    |    |    |          |    |    |    |
|----|---------|----|----|----|----------|----|----|----|
| 15 | 17 9-9  | 11 | 11 | 24 | 9 19-23  | 16 | 23 | 22 |
| 16 | 15 8-9  | 11 | 11 | 24 | 9 19-23  | 15 | 23 | 20 |
| 17 | 18 9-10 | 10 | 11 | 24 | 9 19-24  | 16 | 23 | 21 |
| 16 | 15 9-10 | 11 | 11 |    | 9 19-23  | 16 | 23 | 21 |
| 16 | 15 9-10 | 11 | 11 | 24 | 9 19-23  | 16 | 23 | 21 |
| 17 | 15 9-10 | 11 | 11 | 24 | 9 19-23  | 16 | 23 | 21 |
| 15 | 16 9-9  | 11 | 11 | 24 | 9 19-23  | 14 | 23 | 22 |
| 15 | 15 9-10 | 11 | 11 | 24 | 9 19-23  | 17 | 23 | 21 |
| 16 | 9-10    | 11 | 12 |    | 9 19-23  | 16 | 24 | 21 |
| 16 | 15 9-10 | 11 | 11 | 24 | 9 19-23  | 16 | 23 | 21 |
| 16 | 15 9-10 | 11 | 11 | 24 | 9 19-23  | 16 | 23 | 20 |
| 16 | 15 9-10 | 11 | 11 | 24 | 9 19-23  | 16 | 23 | 21 |
| 16 | 15 9-10 |    | 11 | 24 | 9        | 17 | 23 |    |
| 16 | 15 9-10 | 11 | 11 | 24 | 9 19-23  | 15 | 23 | 21 |
| 16 | 15 9-10 | 11 | 11 | 24 | 9 19-23  | 15 | 23 | 21 |
| 15 | 15 9-10 | 11 | 11 | 24 | 9 19-23  | 16 | 23 | 21 |
| 16 | 16 9-10 | 11 | 11 | 24 | 9 19-23  | 16 | 23 | 21 |
| 16 | 15 9-10 | 11 | 11 | 24 | 9 19-23  | 15 | 23 | 20 |
| 16 | 15 9-10 | 11 | 11 | 24 | 9 19-22  | 16 | 23 | 23 |
| 16 | 14 9-10 | 11 |    | 24 | 19-23    |    |    | 21 |
| 17 | 16 9-9  | 11 |    | 24 | 19-23    |    |    | 22 |
| 16 | 15 9-10 | 11 | 11 | 24 | 9 19-23  | 15 | 23 | 22 |
| 16 | 15 9-10 | 11 | 11 | 24 | 9 19-23  | 16 | 23 | 20 |
| 16 | 15 9-10 | 11 | 11 |    | 9 19-23  | 16 | 23 | 23 |
| 16 | 15 9-10 | 11 | 11 | 24 | 10 19-23 | 16 | 23 | 21 |
| 16 | 15 9-10 | 11 | 11 | 24 | 9 19-23  | 16 | 23 | 21 |
|    | 15      |    |    | 24 |          |    |    |    |
| 15 | 15 9-10 | 11 | 11 | 24 | 9 19-23  | 16 | 23 | 23 |
| 16 | 15 9-10 | 11 | 11 | 24 | 9 19-23  | 16 | 23 | 21 |
| 16 | 15 9-10 | 11 |    | 24 | 19-23    |    |    | 21 |
| 16 | 15 9-10 | 11 | 11 | 24 | 9 19-23  | 16 | 23 | 21 |
| 16 | 16 9-9  | 11 | 11 | 24 | 9 19-23  | 16 | 23 | 20 |
| 16 | 15 9-10 | 11 | 11 | 24 | 9 19-23  | 16 | 23 | 21 |
| 15 | 15 9-10 |    | 11 | 24 | 9        | 16 | 23 |    |

|    |          |    |    |    |         |    |    |    |
|----|----------|----|----|----|---------|----|----|----|
| 16 | 15 9-9   | 12 | 11 | 24 | 9 19-23 | 16 | 23 | 21 |
| 16 | 15 9-9   |    | 11 | 24 | 9       | 16 | 23 |    |
| 16 | 15 9-10  | 12 | 11 | 24 | 9 19-23 | 18 | 23 | 21 |
| 16 | 15 9-10  |    | 11 | 24 | 9       | 15 | 23 |    |
| 16 | 15 9-10  | 12 | 11 | 24 | 9 19-23 | 16 | 23 | 21 |
| 17 | 16 9-10  | 12 | 11 | 24 | 9 19-23 | 16 | 23 | 22 |
| 16 | 15 10-10 | 11 | 11 | 24 | 9 19-23 | 15 | 23 | 21 |
| 16 | 15 9-10  | 11 | 11 | 24 | 9 19-23 | 16 | 23 | 21 |
| 17 | 15 9-10  | 11 | 11 | 24 | 9 19-23 | 16 | 23 | 21 |
| 16 | 15 9-11  | 11 | 11 | 24 | 9 19-23 | 17 | 23 | 22 |
| 16 | 15 9-10  | 11 | 11 | 24 | 9 19-23 | 16 | 23 | 21 |
| 16 | 15 9-10  |    |    | 24 |         |    |    |    |
| 16 | 15 9-9   | 12 | 11 | 24 | 9 19-23 | 16 | 23 | 21 |
| 16 | 15 9-10  | 12 | 11 | 24 | 9 19-23 | 16 | 23 | 21 |
| 15 | 15 9-10  | 11 | 11 | 24 | 9 19-23 | 16 | 23 | 21 |
| 16 | 15 9-10  | 11 | 11 | 24 | 9 19-23 | 16 | 23 | 21 |
| 16 | 15 9-10  | 11 | 11 | 24 | 9 19-23 | 16 | 23 | 21 |
| 16 | 15 9-10  | 11 | 11 | 24 | 9 19-23 | 17 | 23 | 21 |
| 16 | 15 9-10  | 11 |    | 24 | 19-23   |    |    | 21 |
| 16 | 15 9-10  | 11 | 11 | 24 | 9 19-23 | 16 | 23 | 21 |
| 16 | 15 9-10  | 11 | 11 | 24 | 9 19-23 | 17 | 23 | 21 |
| 16 | 16 9-10  | 11 | 11 | 24 | 9 19-23 | 16 | 23 | 19 |
| 16 | 15 9-10  | 11 | 11 | 24 | 9 19-23 | 16 | 23 | 21 |
| 16 | 15 9-10  | 11 | 11 | 24 | 9 19-23 | 16 | 23 | 21 |
| 16 | 15 9-10  | 11 | 11 | 24 | 9 19-23 | 15 | 23 | 21 |
| 16 | 15 9-10  |    | 11 | 24 | 9       | 16 | 23 |    |
| 16 | 15 9-10  | 11 |    | 24 | 19-23   |    |    | 21 |
| 15 | 15 9-10  | 12 | 11 | 24 | 9 19-23 | 16 | 23 | 21 |
| 16 | 15 9-10  |    | 11 | 24 | 9       | 15 | 23 |    |
| 16 | 15 9-10  | 11 | 11 | 24 | 9 19-23 | 16 | 23 | 21 |
| 16 | 15 9-10  | 11 | 11 | 24 | 9 19-23 | 15 | 23 | 21 |
| 15 | 15 9-10  | 11 | 11 | 24 | 9 19-23 | 16 | 23 | 21 |
| 16 | 15 9-10  |    | 11 | 24 | 9       | 15 | 23 |    |
| 17 | 15 9-10  | 11 | 11 | 24 | 9 19-23 | 16 | 23 | 21 |

|    |         |    |    |    |         |    |    |    |
|----|---------|----|----|----|---------|----|----|----|
| 16 | 15 9-10 | 10 | 11 | 24 | 9 19-23 | 16 | 23 | 21 |
| 16 | 15 9-10 | 11 | 11 | 24 | 9 19-23 | 15 | 24 | 22 |
| 16 | 15 9-10 | 11 | 11 | 24 | 9 19-23 | 16 | 23 | 21 |
| 17 | 15 9-10 | 10 | 11 | 24 | 9 19-23 | 15 | 23 | 21 |
| 16 | 15 9-10 | 11 | 11 | 24 | 9 19-23 | 16 | 23 | 21 |
| 16 | 15 9-10 | 11 | 11 | 23 | 9 19-23 | 15 | 23 | 22 |
| 16 | 16 9-10 | 11 | 11 | 24 | 9 19-23 | 16 | 23 | 21 |
| 16 | 15 9-10 |    | 11 | 24 | 9       | 15 | 23 |    |
| 15 | 15 9-10 | 11 | 11 | 24 | 9 19-23 | 16 | 23 | 21 |
| 16 | 16 9-10 | 11 | 12 | 24 | 9 19-23 | 16 | 23 | 21 |
| 16 | 15 9-10 | 11 | 11 | 24 | 9 19-23 | 16 | 23 | 20 |
| 16 | 15 9-10 |    | 11 | 24 | 9       | 16 | 23 |    |
| 15 | 15 9-9  | 12 | 11 | 24 | 9 19-23 | 16 | 24 | 22 |
| 15 | 15 9-10 |    | 11 |    | 9       | 16 | 24 |    |
| 16 | 15 9-10 | 11 | 11 | 24 | 9 19-23 | 14 | 23 | 20 |
| 16 | 16 9-10 | 11 | 11 | 24 | 9 19-23 | 14 | 23 | 22 |
| 16 | 14 9-10 | 11 | 11 | 24 | 9 19-24 | 17 | 23 | 22 |
| 17 | 14 9-10 | 11 | 11 | 24 | 9 19-23 | 16 | 23 | 21 |
| 18 | 15 9-9  |    | 11 | 24 | 9 19-23 | 16 | 23 | 22 |
| 16 | 19 9-10 | 11 | 11 | 24 | 9 19-23 | 15 | 26 | 21 |
| 16 | 15 9-10 | 11 | 11 | 25 | 9 19-23 | 16 | 23 | 22 |
| 15 | 15 9-10 | 11 | 11 | 24 | 9 19-23 | 16 | 23 | 22 |
| 16 | 15 9-10 | 11 | 11 | 24 | 9 19-23 | 17 | 23 | 23 |
| 17 | 15 9-10 | 10 | 12 | 24 | 9 19-23 | 15 | 23 | 21 |
| 16 | 16 9-10 | 11 | 11 | 25 | 9 19-23 | 16 | 23 | 21 |
| 17 | 16 9-10 | 10 | 12 | 24 | 9 19-23 | 15 | 23 | 21 |
| 16 | 15 9-10 | 11 | 11 | 23 | 9 19-23 | 15 | 23 | 21 |
| 16 | 17 9-10 | 11 | 11 | 24 | 9 19-23 | 16 | 24 | 21 |
| 15 | 14 9-10 | 11 | 11 | 23 | 9 19-25 | 16 | 23 | 22 |
| 17 | 15 9-9  | 11 | 11 | 24 | 9 19-23 | 15 | 23 | 23 |
| 16 | 12 9-10 | 12 | 11 |    | 9 19-23 | 17 | 23 | 22 |
| 16 | 17 9-10 | 12 | 11 | 24 | 9 19-23 | 16 | 23 | 21 |
| 17 | 15 9-10 | 11 | 11 |    | 9 19-23 | 15 | 23 | 21 |
| 16 | 14 9-10 | 11 | 11 | 24 | 9 19-23 | 17 | 23 | 22 |

|    |         |    |    |    |          |    |    |    |
|----|---------|----|----|----|----------|----|----|----|
| 16 | 18 9-10 | 11 | 11 | 24 | 9 19-23  | 17 | 25 | 21 |
| 15 | 18 9-10 | 11 | 11 | 24 | 9 19-23  | 16 | 25 | 21 |
| 16 | 16 9-10 | 11 | 12 | 24 | 9 19-23  | 16 | 24 | 22 |
| 16 | 15 9-10 | 10 | 11 |    | 9 19-23  | 16 | 26 | 21 |
| 16 | 15 9-10 | 11 | 10 | 25 | 9 19-23  | 16 | 23 | 21 |
| 16 | 16 9-10 | 11 | 11 | 24 | 9 19-23  | 16 | 23 | 22 |
|    | 15      | 12 |    | 24 | 19-23    |    |    | 22 |
| 16 | 15 9-10 | 11 | 11 | 25 | 9 19-23  | 16 | 23 | 21 |
| 16 | 17 9-10 | 11 | 11 | 24 | 9 19-23  | 16 | 23 | 21 |
| 15 | 16 9-10 | 11 | 11 | 25 | 9 19-23  | 15 | 24 | 22 |
| 17 | 17 9-10 | 10 | 11 | 24 | 9 19-22  | 15 | 25 | 21 |
| 17 | 16 9-10 | 11 | 11 | 24 | 9 19-23  | 16 | 24 | 21 |
| 16 | 13 9-10 | 12 | 11 | 24 | 9 19-23  | 16 | 23 | 21 |
| 15 | 16 9-10 | 11 | 11 | 24 | 9 19-23  | 15 | 23 | 22 |
| 16 | 16 9-10 | 10 | 11 | 24 | 10 19-23 | 15 | 23 | 21 |
| 16 | 16 9-10 | 10 | 12 | 25 | 9 19-23  | 16 | 23 | 20 |
| 16 | 15 9-10 | 13 | 11 | 24 | 9 19-23  | 15 | 23 | 20 |
| 17 | 14 9-9  | 11 | 11 | 25 | 9 19-23  | 15 | 23 | 21 |
| 17 | 15 9-10 | 13 | 11 | 25 | 9 19-23  | 14 | 23 | 21 |
| 17 | 15 9-10 | 12 | 11 | 25 | 9 19-22  | 15 | 23 | 21 |
| 17 | 16 9-10 | 10 | 12 | 24 | 9 19-23  | 14 | 23 | 21 |
| 17 | 15 9-10 | 11 | 11 | 25 | 9 19-23  | 15 | 23 | 21 |
| 17 | 15 9-10 | 10 | 12 | 24 | 9 19-22  | 15 | 23 | 21 |
| 16 | 15 9-10 | 11 | 11 | 24 | 9 19-23  | 15 | 23 | 20 |
|    | 15      |    | 11 |    | 9 19-23  | 15 | 23 | 20 |
| 15 | 15 9-10 | 11 | 11 | 25 | 9 19-23  | 14 | 23 | 22 |
|    | 15      | 10 | 12 | 25 | 9 19-23  | 15 | 23 | 21 |
| 17 | 17 9-10 | 12 | 11 | 24 | 9 19-23  | 16 | 23 | 20 |
| 17 | 15 9-10 | 12 | 11 | 24 | 9 19-23  | 16 | 23 | 22 |
| 16 | 15 9-10 | 11 | 11 | 25 | 9 19-23  | 15 | 23 | 21 |
| 18 | 16 9-10 | 11 | 11 | 25 | 9 19-23  | 15 | 23 | 21 |
| 15 | 9-9     |    | 11 |    | 9        | 15 | 23 |    |
| 17 | 15 9-10 | 11 | 11 | 24 | 9 19-23  | 15 | 23 | 22 |
| 16 | 15 9-10 | 10 | 12 | 24 | 9 19-23  | 15 | 23 | 21 |

|    |         |    |    |    |         |    |    |    |
|----|---------|----|----|----|---------|----|----|----|
| 16 | 15 9-10 | 10 | 11 | 24 | 9 19-23 | 16 | 23 | 22 |
| 17 | 15 9-10 | 10 | 12 | 24 | 9 19-23 | 15 | 23 | 21 |
|    | 14      | 10 | 12 | 24 | 9 19-23 | 15 | 23 | 20 |
| 17 | 15 9-10 | 10 | 12 | 24 | 9 19-23 | 15 | 23 | 21 |
| 17 | 15 9-10 |    | 11 | 25 | 9 19-23 | 15 | 23 | 21 |
| 16 | 16 9-10 | 10 | 12 | 24 | 9 19-23 | 16 | 23 | 22 |
|    | 16      | 10 | 11 | 24 | 9 19-23 | 15 | 23 | 21 |
| 17 | 15 9-10 | 10 | 12 | 24 | 9 19-23 | 15 | 23 | 21 |
| 17 | 15 9-10 | 11 | 12 | 24 | 9 19-23 | 15 | 23 | 21 |
| 17 | 15 9-10 | 10 | 12 | 24 | 9 19-23 | 15 | 23 | 20 |
| 17 | 15 9-10 | 10 | 12 | 24 | 9 19-23 | 15 | 23 | 20 |
|    | 15      |    | 12 | 24 | 9 19-22 | 15 | 23 | 21 |
| 18 | 14 9-10 | 10 | 12 | 24 | 9 19-23 | 15 | 23 | 21 |
| 17 | 15 9-10 | 10 | 12 | 24 | 9 19-23 | 15 | 23 | 21 |
| 15 | 17 9-10 | 11 | 11 | 23 | 9 23-23 | 15 | 23 | 21 |
| 15 | 16 9-10 | 11 | 11 | 24 | 9 19-22 | 17 | 23 | 21 |
| 15 | 15 9-10 | 11 | 11 | 24 | 9 19-22 | 16 | 23 | 21 |
| 15 | 15 9-10 | 11 | 11 |    | 9 19-23 | 16 | 23 | 22 |
| 17 | 15 9-10 | 11 | 11 | 24 | 9 19-22 | 15 | 24 | 21 |
| 17 | 15 9-10 | 11 |    | 24 | 19-23   |    |    | 21 |
| 16 | 16 9-10 | 11 | 11 | 24 | 9 19-23 | 16 | 23 | 20 |
| 16 | 16 9-10 | 10 |    | 24 | 19-23   |    |    | 21 |
| 17 | 15 9-10 | 11 | 11 | 24 | 9 19-23 | 16 | 23 | 21 |
| 17 | 16 9-10 | 11 | 11 | 24 | 9 19-23 | 16 | 23 | 22 |
| 16 | 14 9-10 | 12 | 11 | 24 | 9 19-23 | 15 | 23 | 21 |
| 16 | 16 9-10 | 12 | 11 | 24 | 9 19-23 | 14 | 23 | 21 |
| 15 | 17 9-11 | 11 | 11 | 24 | 9 19-23 | 16 | 23 | 21 |
| 16 | 16 9-10 | 11 | 11 | 24 | 9 19-24 | 16 | 23 | 21 |
| 17 | 16 9-11 | 11 | 11 | 24 | 9 19-23 | 17 | 23 | 21 |
| 17 | 16 9-10 | 11 |    | 24 | 19-23   |    |    | 21 |
| 16 | 16 9-10 | 11 | 11 | 24 | 9 19-21 | 16 | 23 | 21 |
| 17 | 16      | 11 |    | 24 | 19-23   |    |    | 21 |
| 16 | 16 9-9  | 11 | 11 | 24 | 9 19-23 | 17 | 23 | 21 |
| 16 | 16 9-10 | 11 | 11 | 24 | 9 19-23 | 15 | 23 | 21 |

|    |          |    |    |    |          |    |    |    |
|----|----------|----|----|----|----------|----|----|----|
| 15 | 17 9-10  | 11 | 11 | 24 | 9 19-23  | 15 | 23 | 21 |
| 16 | 16 9-10  | 11 | 11 | 24 | 9 19-23  | 16 | 23 | 21 |
| 17 | 15 9-10  | 11 | 11 | 24 | 9 19-23  | 15 | 23 | 21 |
| 17 | 16 9-10  | 11 | 11 | 24 | 9 19-23  | 16 | 23 | 21 |
| 17 | 17 9-10  | 11 | 11 | 23 | 9 19-23  | 16 | 23 | 21 |
| 18 | 16 9-9   | 11 | 11 | 24 | 9 19-23  | 16 | 23 | 21 |
| 18 | 16 9-9   | 11 | 11 | 24 | 9 19-23  | 17 | 23 | 21 |
| 17 | 17 9-10  | 11 | 11 | 24 | 9 19-23  | 16 | 23 | 21 |
| 16 | 17 9-10  | 11 | 11 | 24 | 9 19-23  | 16 | 23 | 22 |
| 16 | 18 9-10  | 11 | 11 | 24 | 9 19-23  | 16 | 23 | 21 |
| 16 | 16 9-9   | 12 | 11 | 24 | 9 19-23  | 16 | 23 | 20 |
| 16 | 16 9-9   | 11 | 11 | 24 | 9 19-23  | 16 | 23 | 21 |
| 17 | 17 9-10  | 11 | 11 | 24 | 9 19-23  | 16 | 23 | 21 |
| 16 | 17 9-9   | 12 | 11 | 24 | 9 19-23  | 16 | 23 | 21 |
| 16 | 17 9-10  | 13 | 12 |    | 9 19-23  | 16 | 23 | 21 |
| 16 | 15 9-10  | 11 | 11 | 24 | 9 19-23  | 16 | 23 | 21 |
| 17 | 16 9-10  | 11 | 11 | 24 | 9 19-23  | 17 | 23 | 21 |
| 16 | 17 9-10  | 11 | 12 | 24 | 9 19-23  | 16 | 23 | 21 |
| 17 | 16 9-10  | 11 | 11 | 24 | 9 19-23  | 15 | 24 | 21 |
| 16 | 16 9-9   | 11 | 11 | 24 | 9 19-23  | 15 | 23 | 21 |
| 16 | 16 9-10  | 11 | 11 | 24 | 9 19-23  | 16 | 23 | 21 |
| 17 | 17 9-9   | 11 | 11 | 24 | 9 19-19  | 15 | 23 | 21 |
| 16 | 16 9-10  | 10 | 11 | 24 | 9 18-23  | 14 | 23 | 22 |
| 16 | 15 9-10  | 11 | 11 | 24 | 9 19-23  | 15 | 23 | 22 |
| 16 | 16 9-10  | 11 | 11 | 24 | 10 19-23 | 16 | 23 | 20 |
| 16 | 18 9-10  | 11 | 11 | 24 | 9 19-23  | 16 | 24 | 21 |
| 18 | 17 10-10 | 11 | 11 | 24 | 9 19-23  | 15 | 23 | 21 |
|    | 16       | 11 | 11 |    | 9 19-23  | 16 | 23 | 21 |
|    | 17       | 11 | 11 | 24 | 9 19-23  | 16 | 23 | 21 |
|    | 19       | 11 |    | 24 | 19-23    |    |    | 21 |
|    | 17       | 11 | 11 | 24 | 9 19-23  | 16 | 23 | 21 |
| 16 | 16 10-10 | 10 | 11 | 24 | 9 19-23  | 16 | 23 | 21 |
| 17 | 16 9-10  | 11 | 11 | 24 | 9 19-24  | 15 | 23 | 21 |
| 15 | 16 9-10  | 11 | 11 | 24 | 9 19-23  | 15 | 23 | 21 |



|    |          |    |    |    |          |    |    |    |
|----|----------|----|----|----|----------|----|----|----|
| 16 | 16 9-10  | 12 | 11 | 24 | 9 19-23  | 17 | 23 | 20 |
| 16 | 17 9-10  | 11 | 11 | 24 | 9 19-23  | 16 | 23 | 21 |
| 15 | 17 9-9   | 11 | 11 | 24 | 9 19-23  | 16 | 23 | 21 |
| 16 | 18 9-10  | 12 | 11 | 24 | 9 19-23  | 16 | 23 | 21 |
| 15 | 16 9-10  | 11 | 11 | 24 | 9 19-23  | 14 | 23 | 21 |
| 16 | 18 9-10  | 11 | 11 | 24 | 9 19-23  | 16 | 23 | 22 |
| 16 | 17 9-10  | 11 |    | 24 | 19-23    |    |    | 22 |
| 17 | 16 9-10  | 11 | 11 | 24 | 9 19-22  | 16 | 23 | 21 |
| 17 | 15 9-10  | 11 | 11 | 24 | 9 19-23  | 16 | 23 | 21 |
| 17 | 16 9-10  | 11 | 11 | 24 | 9 19-23  | 16 | 23 | 21 |
| 17 | 16 10-10 | 10 | 11 | 24 | 9 19-23  | 16 | 23 | 20 |
| 16 | 16 9-10  | 11 | 11 | 24 | 9 19-23  | 16 | 23 | 21 |
| 16 | 15 9-10  | 11 | 11 | 24 | 9 19-23  | 16 | 23 | 21 |
| 16 | 16 9-10  | 11 | 11 | 24 | 9 19-23  | 15 | 23 | 21 |
| 17 | 16 9-10  | 10 | 11 | 24 | 9 19-23  | 16 | 23 | 20 |
| 15 | 17 9-10  | 11 | 11 | 24 | 9 19-23  | 16 | 23 | 21 |
| 16 | 16 9-10  | 11 |    | 24 | 19-23    |    |    | 21 |
| 16 | 17 9-9   | 11 | 12 | 24 | 9 19-23  | 15 | 23 | 21 |
| 17 | 16 9-9   | 11 | 11 | 24 | 9 19-23  | 16 | 23 | 21 |
| 18 | 16 9-10  | 11 | 11 | 24 | 10 19-23 | 15 | 23 | 21 |
