# Supplementary material for: Separating the post-Glacial coancestry of European and Asian Y chromosomes within haplogroup R1a
Source: Springer Nature journal article supplement (doi:10.1038/ejhg.2009.194), 2009-11-04
Supplement: 41431_2010_BFejhg2009194_MOESM23_ESM.doc [file 41431_2010_BFejhg2009194_MOESM23_ESM.doc]

**Supplementary Figure S2**. Median joining network of haplogroup R1a1a7 and R1a1a* haplotypes by three STR loci. The network displays variation at three STR loci (DYS391, DYS439, and DYS447) that show the highest discriminatory power between M458 A and G allele carriers by two criteria: difference at median type and low intragroup variance (var<0.5).
