# Supplementary material for: Separating the post-Glacial coancestry of European and Asian Y chromosomes within haplogroup R1a
Source: Springer Nature journal article supplement (doi:10.1038/ejhg.2009.194), 2009-11-04
Supplement: ejhg2009194x4.pdf [file ejhg2009194x4.pdf]

Browse Articles
| European Journal of Human Genetics


Skip to main content

Thank you for visiting nature.com. You are using a browser version with limited support for CSS. To obtain
the best experience, we recommend you use a more up to date browser (or turn off compatibility mode in
Internet Explorer). In the meantime, to ensure continued support, we are displaying the site without styles
and JavaScript.

Advertisement


- View all journals
- Search
- Log in

- Explore content
- About the journal
- Publish with us

- Sign up for alerts
- RSS feed


1. nature
2. european journal of human genetics
3. browse articles

# Browse Articles

## Filter By:

Article Type

All

- All
- Announcement (33)
- Article (3732)
- Book Review (98)
- Brief Communication (140)
- Clinical Utility Gene Card (158)
- Comment (101)
- Correction (66)
- Correspondence (44)
- Corrigendum (105)
- Editorial (70)
- Erratum (34)
- Letter (197)
- News and Commentary (102)
- Original Paper (304)
- Policy (98)
- Practical Genetics (47)
- Review (109)
- Review Article (78)
- Short Report (623)
- Viewpoint (67)

Year

All

- All
- 2024 (95)
- 2023 (240)
- 2022 (252)
- 2021 (230)
- 2020 (222)
- 2019 (249)
- 2018 (292)
- 2017 (200)
- 2016 (210)
- 2015 (285)
- 2014 (298)
- 2013 (319)
- 2012 (318)
- 2011 (283)
- 2010 (237)
- 2009 (247)
- 2008 (289)
- 2007 (209)
- 2006 (210)
- 2005 (195)

- ### The first genetically confirmed cohort of Facioscapulohumeral Muscular Dystrophy from Northern India

  - Venugopalan Y. Vishnu
  - Richard J. L. F. Lemmers
  - M. V. Padma Srivastava

  ArticleOpen Access25 Apr 2024
- ### Discovery of recessive effect of human polymerase δ proofreading deficiency through mutational analysis of POLD1-mutated normal and cancer cells

  - Maria A. Andrianova
  - Vladimir B. Seplyarskiy
  - Laura Valle

  ArticleOpen Access24 Apr 2024
- ### “Uninsurable because of a genetic test”: a qualitative study of consumer views about the use of genetic test results in Australian life insurance

  - Cassandra Muller
  - Lyndon Gallacher
  - Jane Tiller

  ArticleOpen Access19 Apr 2024
- ### Liminality between direct and family-mediated contact in the communication of genetic information to at-risk relatives

  - Álvaro Mendes
  - Ainsley J. Newson

  CommentOpen Access16 Apr 2024
- ### Outcomes of patients with Juvenile Polyposis-Hereditary Haemorrhagic Telangiectasia caused by pathogenic *SMAD4* variants in a pan-Scotland cohort

  - Madeline Pearson
  - Ruth McGowan
  - Jonathan Berg

  Brief CommunicationOpen Access16 Apr 2024
- ### A mutation in CCDC91, Homo sapiens coiled-coil domain containing 91 protein, cause autosomal-dominant acrokeratoelastoidosis

  - Yunlu Zhu
  - Yun Bai
  - Yeqiang Liu

  ArticleOpen Access16 Apr 2024
- ### Ethical and social implications of public–private partnerships in the context of genomic/big health data collection

  This paper reports on the findings of an international workshop organised by the UK-France+ Genomics and Ethics Network (UK-FR + GENE) in 2022. The focus of the workshop were the ethical and social issues raised by public-private partnerships in the context of large-scale genomics initiatives in France, Germany, the United Kingdom and Israel, i.e. collaborations where commercial entities are given access to publicly held genomic data. While the public sector relies on partnerships with commercial entities to exploit the full potential of the data it holds, such collaborations may have an impact on the return of benefits to the public sector and on public trust, and subsequently challenge the social contract. The first part of this paper explores the ways in which the four countries examined respond to the challenges posed to the social contract, and what safeguards they put in place to secure public trust. The second part presents three approaches to address the challenges of private-public partnerships in secondary data use. In conclusion, this paper offers a set of minimum requirements for these partnerships within solidarity-based publicly funded healthcare systems. These include the necessity of public-private partnerships to (1) contribute to the public benefit and minimise harm produced by the use of publicly held data; (2) avoid prioritisation of commercial interests over robust governance structures to guarantee benefits to the public and protect donors, especially marginalised groups; (3) side-step the pitfalls of the rhetoric of solidarity and be transparent about the challenges to return the benefits to ‘all’.

  - Ruth Horn
  - Jennifer Merchant
  - Eva Winkler

  Meeting ReportOpen Access16 Apr 2024
- ### Evaluation of 100 Dutch cases with 16p11.2 deletion and duplication syndromes; from clinical manifestations towards personalized treatment options

  - Niels Vos
  - Lotte Kleinendorst
  - Mieke M. van Haelst

  ArticleOpen Access11 Apr 2024
- ### Combined approaches, including long-read sequencing, address the diagnostic challenge of *HYDIN* in primary ciliary dyskinesia

  - Andrew Fleming
  - Miranda Galey
  - Deborah J. Morris-Rosendahl

  ArticleOpen Access11 Apr 2024
- ### Role of next generation sequencing in diagnosis and management of critically ill children with suspected monogenic disorder

  - Sameer Bhatia
  - Swasti Pal
  - Ratna Dua Puri

  Article11 Apr 2024
- ### Gene pool preservation across time and space In Mongolian-speaking Oirats

  - Natalia Balinova
  - Georgi Hudjašov
  - Alena Kushniarevich

  ArticleOpen Access11 Apr 2024
- ### Chromosome 20p11.2 deletions cause congenital hyperinsulinism via the loss of *FOXA2* or its regulatory elements

  - Thomas W. Laver
  - Matthew N. Wakeling
  - Sarah E. Flanagan

  ArticleOpen Access11 Apr 2024
- ### Further evidence supporting the role of *GTDC1* in glycine metabolism and neurodevelopmental disorders

  - Edoardo Errichiello
  - Mauro Lecca
  - Maria Clara Bonaglia

  ArticleOpen Access11 Apr 2024
- ### Artificial intelligence – the next generation of sequencing?

  - Alisdair McNeill

  Editorial05 Apr 2024
- ### Correction: Expansion of the neurodevelopmental phenotype of individuals with *EEF1A2* variants and genotype-phenotype study

  - Alix Paulet
  - Cavan Bennett-Ness
  - Lyse Ruaud

  Correction03 Apr 2024
- ### Dutch Pharmacogenetics Working Group (DPWG) guideline for the gene-drug interaction of *CYP2C9, HLA-A* and *HLA-B* with anti-epileptic drugs

  - Lisanne E. N. Manson
  - Marga Nijenhuis
  - Henk-Jan Guchelaar

  Article03 Apr 2024
- ### Overcoming barriers to single-cell RNA sequencing adoption in low- and middle-income countries

  - Tracy Boakye Serebour
  - Adam P. Cribbs
  - Sarah J. B. Snelling

  Review ArticleOpen Access02 Apr 2024
- ### De novo variants in *GABRA4* are associated with a neurological phenotype including developmental delay, behavioral abnormalities and epilepsy

  - Samin A. Sajan
  - Ralph Gradisch
  - Martin Krenn

  ArticleOpen Access02 Apr 2024
- ### A framework for the evaluation and reporting of incidental findings in clinical genomic testing

  - Carolyn M. Brown
  - Laura M. Amendola
  - Alison J. Coffey

  Article02 Apr 2024
- ### Pathogenicity of de novo *CACNA1D* Ca2+ channel variants predicted from sequence co-variation

  - Xuechen Tang
  - Nadine J. Ortner
  - Klaus R. Liedl

  ArticleOpen Access29 Mar 2024

- Previous page
- page 1
- page 2
- page 3
- …
- page 318
- Next page

## Explore content

- Research articles
- Reviews & Analysis
- News & Comment
- Current issue
- Collections

- Follow us on Twitter
- Sign up for alerts
- RSS feed


## About the journal

- Journal Information
- Open Access Fees and Funding
- About the Editors
- About the Partner
- Contact
- For Advertisers
- Subscribe


## Publish with us

- For Authors & Referees
- Language editing services
- Submit manuscript

## Search

Search articles by subject, keyword or author

Show results from

All journals
This journal

Search

Advanced search

### Quick links

- Explore articles by subject
- Find a job
- Guide to authors
- Editorial policies

European Journal of Human Genetics (*Eur J Hum Genet*)

ISSN 1476-5438 (online)

ISSN 1018-4813 (print)

## nature.com sitemap

### About Nature Portfolio

- About us
- Press releases
- Press office
- Contact us

### Discover content

- Journals A-Z
- Articles by subject
- protocols.io
- Nature Index

### Publishing policies

- Nature portfolio policies
- Open access

### Author & Researcher services

- Reprints & permissions
- Research data
- Language editing
- Scientific editing
- Nature Masterclasses
- Research Solutions

### Libraries & institutions

- Librarian service & tools
- Librarian portal
- Open research
- Recommend to library

### Advertising & partnerships

- Advertising
- Partnerships & Services
- Media kits
- Branded
  content

### Professional development

- Nature Careers
- Nature 
  Conferences

### Regional websites

- Nature Africa
- Nature China
- Nature India
- Nature Italy
- Nature Japan
- Nature Middle East

- Privacy
  Policy
- Use
  of cookies
- Your privacy choices/Manage cookies
- Legal
  notice
- Accessibility
  statement
- Terms & Conditions
- Your US state privacy rights

© 2024 Springer Nature Limited

xml version="1.0" encoding="UTF-8"?
